# Supplementary material for: Association between objectively measured physical activity and longitudinal changes in body composition in adolescents: the Tromsø study fit futures cohort
Source: PubMed Central journal article supplement — BMJ Open. 2020 Oct 7;10(10):e036991. doi: 10.1136/bmjopen-2020-036991 (PMC7542926; doi:10.1136/bmjopen-2020-036991), 2020-10-07
Supplement: bmjopen-2020-036991.draft_revisions.pdf [file bmjopen-2020-036991.draft_revisions.pdf]

# BMJ Open

BMJ Open is committed to open peer review. As part of this commitment we make the peer review history of every article we publish publicly available.

When an article is published we post the peer reviewers' comments and the authors' responses online. We also post the versions of the paper that were used during peer review. These are the versions that the peer review comments apply to.

The versions of the paper that follow are the versions that were submitted during the peer review process. They are not the versions of record or the final published versions. They should not be cited or distributed as the published version of this manuscript.

BMJ Open is an open access journal and the full, final, typeset and author-corrected version of record of the manuscript is available on our site with no access controls, subscription charges or pay-per-view fees (<http://bmjopen.bmj.com>).

If you have any questions on BMJ Open's open peer review process please email [info.bmjopen@bmj.com](mailto:info.bmjopen@bmj.com)

# BMJ Open

## The association between objectively measured physical activity and longitudinal changes in body composition in adolescents; The Tromsø Study Fit Futures Cohort.

|                               |                                                                                                                                                                                                                                                                                                                                                                                                                                                                                                                                                                                                                                                                                                                                                                                                                                                                                                                                                                                            |
|-------------------------------|--------------------------------------------------------------------------------------------------------------------------------------------------------------------------------------------------------------------------------------------------------------------------------------------------------------------------------------------------------------------------------------------------------------------------------------------------------------------------------------------------------------------------------------------------------------------------------------------------------------------------------------------------------------------------------------------------------------------------------------------------------------------------------------------------------------------------------------------------------------------------------------------------------------------------------------------------------------------------------------------|
| Journal:                      | <i>BMJ Open</i>                                                                                                                                                                                                                                                                                                                                                                                                                                                                                                                                                                                                                                                                                                                                                                                                                                                                                                                                                                            |
| Manuscript ID                 | bmjopen-2020-036991                                                                                                                                                                                                                                                                                                                                                                                                                                                                                                                                                                                                                                                                                                                                                                                                                                                                                                                                                                        |
| Article Type:                 | Original research                                                                                                                                                                                                                                                                                                                                                                                                                                                                                                                                                                                                                                                                                                                                                                                                                                                                                                                                                                          |
| Date Submitted by the Author: | 23-Jan-2020                                                                                                                                                                                                                                                                                                                                                                                                                                                                                                                                                                                                                                                                                                                                                                                                                                                                                                                                                                                |
| Complete List of Authors:     | Aars, Nils; UiT – The Arctic University of Norway, Department of Community Medicine; Nordlandssykehuset HF<br>Beldo, Sigurd; UiT Arctic University of Norway, School of Sport Sciences<br>Jacobsen, Bjarne; UiT – The Arctic University of Norway, Department of Community Medicine; UiT – The Arctic University of Norway, Centre for Sami Health Research<br>Horsch, Alexander; UiT – The Arctic University of Norway, Department of Computer Science<br>Morseth, Bente; UiT Arctic University of Norway, School of Sport Sciences; UiT – The Arctic University of Norway, Department of Community Medicine<br>Emaus, Nina; UiT The Arctic University of Norway, Department of Health and Care Sciences<br>Furberg, Anne-Sofie; UiT The Arctic University of Norway, Department of Community Medicine; Universitetssykehuset Nord-Norge, Department of Microbiology and Infection Control<br>Grimsgaard, Sameline; UiT The Arctic University of Norway, Department of Community Medicine |
| Keywords:                     | EPIDEMIOLOGY, PUBLIC HEALTH, SPORTS MEDICINE                                                                                                                                                                                                                                                                                                                                                                                                                                                                                                                                                                                                                                                                                                                                                                                                                                                                                                                                               |
|                               |                                                                                                                                                                                                                                                                                                                                                                                                                                                                                                                                                                                                                                                                                                                                                                                                                                                                                                                                                                                            |

SCHOLARONE™  
Manuscripts

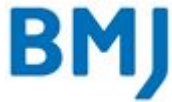

I, the Submitting Author has the right to grant and does grant on behalf of all authors of the Work (as defined in the below author licence), an exclusive licence and/or a non-exclusive licence for contributions from authors who are: i) UK Crown employees; ii) where BMJ has agreed a CC-BY licence shall apply, and/or iii) in accordance with the terms applicable for US Federal Government officers or employees acting as part of their official duties; on a worldwide, perpetual, irrevocable, royalty-free basis to BMJ Publishing Group Ltd ("BMJ") its licensees and where the relevant Journal is co-owned by BMJ to the co-owners of the Journal, to publish the Work in this journal and any other BMJ products and to exploit all rights, as set out in our [licence](#).

The Submitting Author accepts and understands that any supply made under these terms is made by BMJ to the Submitting Author unless you are acting as an employee on behalf of your employer or a postgraduate student of an affiliated institution which is paying any applicable article publishing charge ("APC") for Open Access articles. Where the Submitting Author wishes to make the Work available on an Open Access basis (and intends to pay the relevant APC), the terms of reuse of such Open Access shall be governed by a Creative Commons licence – details of these licences and which [Creative Commons](#) licence will apply to this Work are set out in our licence referred to above.

Other than as permitted in any relevant BMJ Author's Self Archiving Policies, I confirm this Work has not been accepted for publication elsewhere, is not being considered for publication elsewhere and does not duplicate material already published. I confirm all authors consent to publication of this Work and authorise the granting of this licence.

1  
2  
3  
4 1 **The association between objectively measured physical activity and longitudinal**  
5  
6  
7 2 **changes in body composition in adolescents; The Tromsø Study Fit Futures Cohort.**  
8  
9

10  
11 3 Nils Abel Aars<sup>1, 2\*</sup>  
12

13  
14  
15 4 Sigurd Beldo<sup>3</sup>  
16

17  
18  
19 5 Bjarne K Jacobsen<sup>1, 4</sup>  
20  
21

22  
23 6 Alexander Horsch<sup>5</sup>  
24  
25

26  
27 7 Bente Morseth<sup>3, 1</sup>  
28  
29

30  
31 8 Nina Emaus<sup>6</sup>  
32  
33

34  
35 9 Anne-Sofie Furberg<sup>1, 7</sup>  
36  
37

38  
39 10 Sameline Grimsgaard<sup>1</sup>  
40  
41

42  
43  
44 11  
45  
46

47  
48 12 **Affiliations**  
49

50  
51  
52 13 1. Department of Community Medicine, UiT the Arctic University of Norway, Tromsø,  
53  
54

55  
56 14 Norway  
57  
58  
59  
60

- 1  
2  
3  
4 1 2. Nordland Hospital, Bodø, Norway.  
5  
6  
7  
8 2 3. School of Sport Sciences, UiT the Arctic University of Norway, Alta, Norway  
9  
10  
11  
12 3 4. Centre for Sami Health Research, Department of Community Medicine, UiT the  
13  
14  
15 4 Arctic University of Norway, Tromsø, Norway  
16  
17  
18  
19 5 5. Department of Computer Science, UiT the Arctic University of Norway, Tromsø,  
20  
21  
22  
23 6 Norway  
24  
25  
26  
27 7 6. Department of Health and Care Sciences, UiT the Arctic University of Norway,  
28  
29  
30 8 Tromsø, Norway  
31  
32  
33  
34 9 7. Department of Microbiology and Infection Control, University Hospital of North  
35  
36  
37  
38 10 Norway, Tromsø, Norway  
39  
40  
41  
42 11 \* Corresponding author. Correspondence to [nils.a.aars@uit.no](mailto:nils.a.aars@uit.no)  
43  
44  
45  
46 12 Nils Abel Aars  
47  
48  
49  
50 13 Department of Community Medicine  
51  
52  
53  
54 14 UiT the Arctic University of Norway  
55  
56  
57  
58 15 9037 Tromsø, Norway.  
59  
60

1  
2  
3  
4  
5  
6  
7  
8  
9  
10  
11  
12  
13  
14  
15  
16  
17  
18  
19  
20  
21  
22  
23  
24  
25  
26  
27  
28  
29  
30  
31  
32  
33  
34  
35  
36  
37  
38  
39  
40  
41  
42  
43  
44  
45  
46  
47  
48  
49  
50  
51  
52  
53  
54  
55  
56  
57  
58  
59  
60

1

2

For peer review only

1  
2  
3  
4 1 **Abstract**

5  
6  
7 2 **Objectives:** Physical activity may play an important role in deterring the world-wide  
8  
9  
10  
11 3 obesity epidemic. This study explored the effect of objectively measured physical  
12  
13  
14 4 activity on changes in body composition over two years of follow up in an adolescent  
15  
16  
17  
18 5 population in Northern Norway.

19  
20  
21  
22 6 **Design:** A longitudinal study of adolescents (60.5% girls, mean age 16 at baseline)  
23  
24  
25  
26 7 participating in the Fit Futures studies 1 (2010-11) and 2 (2012-13).  
27  
28  
29

30 8 **Setting:** Upper secondary high schools in neighboring municipalities of Tromsø and  
31  
32  
33 9 Balsfjord, northern Norway.  
34  
35  
36

37 10 **Participants:** Students participating in both studies and under the age of 18 at  
38  
39  
40  
41 11 baseline, and with valid measurement of both exposure and outcomes. Physical  
42  
43  
44 12 activity was measured using a hip-worn accelerometer, and provided measurements  
45  
46  
47  
48 13 of minutes per day spent in sedentary-, light and moderate-to-vigorous physical  
49  
50  
51 14 activity.  
52  
53  
54

55 15 **Primary- and secondary outcomes:** Change in objectively measured body mass index  
56  
57  
58  
59 16 and waist circumference, and change in dual-energy x-ray absorptiometry measured  
60

1 fat mass index, lean mass index and appendicular lean mass index between baseline  
2 and follow-up. Differences in measures of physical activity at baseline between sexes  
3 was also compared.

4 **Results:** Boys had significantly higher physical activity volume ( $p=0.01$ ) and spent  
5 more minutes in moderate physical activity (MVPA) than girls (6.4 minutes,  $p < 0.01$ ).

6 In multivariate regression analyses there was no significant association between  
7 either measure of physical activity and changes in body composition in boys. In girls  
8 there was a significant association between sedentary- and light activity and changes  
9 in lean mass index ( $p < 0.01$ ) and appendicular lean mass index ( $p = 0.05$ ).

10 **Conclusions:** In this cohort of Norwegian adolescents, sedentary and light physical  
11 activity were associated with changes in indices of lean mass in girls, but not boys.  
12 Minutes spent in moderate-to-vigorous physical activity was not associated with  
13 changes in either measure of body composition in neither boys nor girls.

#### 14 **Strengths and limitations of this study**

- 15 • This study used objective measures of physical activity.



- 1  
2  
3  
4 1 • The study included objectively measured weight, height and waist  
5  
6  
7 2 circumference, and dual-energy x-ray absorptiometry (DXA) measures of fat-  
8  
9  
10 3 and lean mass.  
11  
12  
13  
14 4 • We were not able to fully adjust for nutrition and not for pubertal development.  
15  
16  
17 5 • The 431 participants with complete data from both baseline and follow-up  
18  
19  
20 6 represents 41% of those attending Fit Futures 1, indicating a degree of  
21  
22  
23  
24 7 selection.  
25  
26  
27  
28 8  
29  
30  
31  
32 9  
33  
34  
35  
36  
37  
38  
39  
40  
41  
42  
43  
44  
45  
46  
47  
48  
49  
50  
51  
52  
53  
54  
55  
56  
57  
58  
59  
60

## 1 Background

2 The potential of physical activity to prevent or treat a number of diseases has been  
3 highlighted by the World Health Organization,[1] with inactivity accounting for 9% of  
4 worldwide premature mortality.[2] Public health guidelines state that adolescents  
5 should engage in Moderate-to-Vigorous Physical Activity (MVPA)  $\geq$  60 minutes per  
6 day,[3] but in 2011, only 50% of Norwegian 15 year olds met these  
7 recommendations.[4] During adolescence there is a decline in both total physical  
8 activity and MVPA,[5, 6] and many quit or reduce participation in organized sports.[7]  
9 As of 2013, the prevalence of overweight and obesity (Body Mass Index (BMI)  $\geq$  25  
10 kg/m<sup>2</sup>) in Norwegians aged <20 years appear to be stabilizing at around 20% in boys  
11 and 16% in girls - comparable to the Nordic countries.[8] This is lower than in the  
12 United States (around 29% in boys and girls) [8], but the health effects for those  
13 concerned may still be substantial over the long term.[9]  
14 While physical activity has many positive health effects, its relationship with adiposity  
15 is less clear and it has proven difficult to determine causality, direction and magnitude  
16 of this relationship.[10] Cross-sectional research typically shows a strong negative

1  
2  
3  
4 1 association between physical activity and weight status,[11] but temporality cannot be  
5  
6  
7 2 ascertained using such study designs.[12] Longitudinal studies may ascertain if lower  
8  
9  
10 3 physical activity precedes excess weight gain, but a review found no evidence for a  
11  
12  
13  
14 4 relationship between objectively measured physical activity and body fat gain in  
15  
16  
17 5 adolescents.[12] The lack of congruent results may in part be explained by the  
18  
19  
20  
21 6 diverse and inadequate measures of both exposure and outcome used in research of  
22  
23  
24 7 the association between physical activity and body composition.[10, 11]  
25  
26  
27  
28 8 Although many methods to measure physical activity are available, the most common  
29  
30  
31  
32 9 and most feasible is self-report which commonly overestimates the total amount of  
33  
34  
35  
36 10 physical activity.[13] Body composition is most commonly assessed using BMI, but  
37  
38  
39 11 BMI does not distinguish between fat- and muscle mass.[14] This has the potential to  
40  
41  
42 12 cause misclassification of overweight status and may attenuate a true association  
43  
44  
45  
46 13 between physical activity and fat or muscle mass. Thus, in the current study, we  
47  
48  
49 14 sought to overcome these limitations by applying objective measures of both physical  
50  
51  
52  
53 15 activity and specific measures of body composition. Our aim was to investigate the  
54  
55  
56 16 association between objectively measured physical activity and changes in five  
57  
58  
59 17 different measures of body composition (body mass index, waist circumference, fat

1  
2  
3  
4 1 mass index, lean mass index and appendicular lean mass index) over two years of  
5  
6  
7 2 follow-up in a cohort of Norwegian adolescents.  
8  
9

#### 10 11 3 12 13 14 15 4 **Methods and materials** 16

17  
18  
19 5 We used data from the first and second Fit Futures cohort studies, performed in  
20  
21  
22  
23 6 2010-2011 and 2012-2013, respectively. The first study invited all students (n=1,117)  
24  
25  
26 7 in their first year of upper secondary high school in the neighboring municipalities of  
27  
28  
29  
30 8 Tromsø and Balsfjord in northern Norway, and had a participation of 93%. The study  
31  
32  
33 9 was repeated two years later, when the students were in their last year of upper  
34  
35  
36  
37 10 secondary high school or had started as apprentices if they studied vocational  
38  
39  
40 11 subjects. The second study included 868 participants, giving an attendance of 77%.  
41  
42  
43  
44 12 Altogether 735 adolescents attended both surveys. We excluded those aged  $\geq 18$   
45  
46  
47 13 years of age at baseline (n = 38). Some participants (n = 240) did not have valid  
48  
49  
50  
51 14 measurements of physical activity at baseline, and were therefore not included in the  
52  
53  
54 15 study. We also excluded those with missing data on outcomes or variables included  
55  
56  
57  
58  
59  
60

1  
2  
3 1 in the model (n = 26). Thus, 431 participants were included in the present study  
4  
5  
6  
7 2 (60.3% girls).  
8  
9

10  
11 3 Students were granted leave of absence from school to attend an examination at the  
12  
13  
14 4 Clinical Research Unit at the University Hospital of Northern Norway in both surveys.  
15  
16

17  
18 5 The participants signed a letter of informed consent and attended a clinical  
19  
20  
21 6 examination where they also answered a questionnaire. Those under the age of 16  
22  
23  
24  
25 7 brought a letter of consent signed by their parent or guardian.  
26  
27

28  
29 8 All measurements were performed by trained personnel. Height was measured to the  
30  
31  
32 9 nearest centimeter and weight to the nearest 100 gram, wearing light clothing and  
33  
34  
35  
36 10 using an automatic electronic scale/stadiometer (Jenix DS 102 stadiometer, Dong  
37  
38  
39  
40 11 Sahn Jenix, Seoul, Korea). Body mass index was calculated as body weight in  
41  
42  
43 12 kilograms/height in meters<sup>2</sup>. Waist circumference was measured to the nearest 0.1  
44  
45  
46  
47 13 centimeter at the height of the umbilicus. Fat and soft tissue lean mass in grams was  
48  
49  
50 14 estimated by whole-body dual energy X-ray absorptiometry (DXA) (GE Lunar  
51  
52  
53  
54 15 Prodigy, Lunar Corporation, Madison, WI, USA). Fat mass comprises all fat, while  
55  
56  
57 16 soft tissue lean mass comprises all bodily tissue except fat and skeletal mass. These  
58  
59  
60

1 variables were used to calculate fat mass index (FMI, fat mass in kilograms/height in  
2 meters<sup>2</sup>) and lean mass index (LMI, lean mass in kilograms/height in meters<sup>2</sup>). In  
3 addition we calculated appendicular lean mass index (aLMI), which is the sum of soft  
4 tissue lean mass in kilograms in all four extremities divided by height in meters<sup>2</sup>.  
5 Although most commonly used in studies of sarcopenia in elderly,[15] this variable is  
6 arguably more specific to skeletal muscle mass than total lean mass index. The  
7 ability of DXA to detect changes in appendicular lean mass in young adolescents is  
8 good, and has been validated against Magnetic Resonance Imaging (MRI).[16]  
9 Physical activity was objectively measured using the ActiGraph GT3X accelerometer  
10 (ActiGraph, LLC, Pensacola, USA). Participants were instructed to wear the device  
11 on their right hip for seven consecutive days, and to remove it only when showering,  
12 swimming or sleeping. The ActiLife software was used to initialize the accelerometer  
13 and download data, which was imported into the Quality Control & Analysis Tool  
14 (QCAT) for data processing. This software was developed by the research group of  
15 professor Horsch in Matlab (The MathWorks, Inc., Massachusetts, USA) for  
16 processing of accelerometer data. The accelerometer was set in raw data mode, with  
17 a sampling frequency of 30 Hertz and with normal filtering epochs of 10 seconds.

1  
2  
3  
4 1 Data collection was initiated at 14:00 hours the first day, and concluded at 23:58 on  
5  
6  
7 2 the 8<sup>th</sup> day of measurement. We excluded data from the first day of measurement to  
8  
9  
10 3 reduce reactivity bias. The criteria for a valid measurement of physical activity was  
11  
12  
13  
14 4 wear time of  $\geq$  four consecutive days, with  $\geq$  ten hours wear time per day. This has  
15  
16  
17 5 been demonstrated as representative of activity over a full week.[17] The triaxial  
18  
19  
20  
21 6 algorithm developed by Hecht et al. was used to calculate wear time.[18] Minutes per  
22  
23  
24 7 day in sedentary (0 – 99 CPM), light (100 – 1951 CPM), moderate (1952 – 5723  
25  
26  
27 8 CPM) and vigorous ( $\geq$  5724 CPM) physical activity was determined using the cut-offs  
28  
29  
30  
31 9 developed by Freedson.[19] The device collected data in both uniaxial- and triaxial  
32  
33  
34  
35 10 mode, but in the present study only the uniaxial data had been processed and  
36  
37  
38 11 therefore available. Studies have shown that uniaxial data recorded from the GT3X  
39  
40  
41  
42 12 correlate well with uniaxial data recorded from previous ActiGraph models.[20]  
43  
44  
45  
46 13 Baseline characteristics were presented as means with standard deviation (SD) or  
47  
48  
49 14 prevalence in percentages with number of subjects (n). Sex-specific difference in  
50  
51  
52  
53 15 body composition between baseline and follow-up was tested using a paired samples  
54  
55  
56 16 t-test. The difference in physical activity between sexes was tested using a two-  
57  
58  
59  
60 17 sample t-test, while sex differences in categories of minutes spent in MVPA was

1 tested using a chi-square test. Difference in linear trend across categories of minutes  
2 spent in MVPA was tested using STATA's non-parametric test for trend, developed  
3 by Cuzick.[21] Linear regression was used to determine the effect of baseline  
4 physical activity on change in body composition, i.e., the change in BMI, waist  
5 circumference, FMI, LMI and aLMI from the first to the second Fit Futures Study.  
6 We used three different predictors of change in body composition, performing three  
7 sets of analyses, with first; minutes per day spent in sedentary activity (Table 2)  
8 second; minutes per day spent in light activity (Table 3) and third; minutes per day  
9 spent in MVPA (Table 4). We divided the continuous variables sedentary- and light  
10 activity by 30 and the continuous variable MVPA by 15 before inclusion in the  
11 models, thus presenting the beta coefficient for change in outcome per 30 minutes of  
12 sedentary- or light activity, or per 15 minutes of MVPA, with 95% confidence intervals  
13 and a p-value. In model 1 we adjusted for the baseline measurement of the outcome.  
14 In the adjusted models (models 2) we also included time between measurements  
15 (mean: 730 days) and baseline values of device wear time, age in half years and  
16 questionnaire data on screen time on weekdays (how many hours per weekday the  
17 students spent in front of a computer or television - answers ranged from none to



1  
2  
3 1 more than ten hours per weekday) and regularity of eating breakfast as an indicator  
4  
5  
6  
7 2 of healthy meal patterns (answers ranging from rarely/never to every day). In the  
8  
9  
10 3 analyses of sedentary- and light activity we also adjusted for minutes spent in MVPA  
11  
12  
13  
14 4 (models 3). In a subset of analyses (Appendix tables 1 and 2) we repeated the  
15  
16  
17 5 analyses performed in Table 2 and 3, adjusting also for self-reported pubertal status  
18  
19  
20  
21 6 measured by either pubertal development scale (boys) or age at menarche (girls).  
22  
23  
24 7 These analyses included the 143 boys and 256 girls with valid data on pubertal  
25  
26  
27  
28 8 status. In all the analyses, a p-value of  $< 0.05$  was considered statistically significant.  
29  
30  
31  
32 9 All analyses were performed sex-specific as decided a-priori, using STATA version  
33  
34  
35  
36 10 14 (StataCorp. 2015. *Stata Statistical Software: Release 14*. College Station, TX:  
37  
38  
39 11 StataCorp LP.).  
40  
41  
42

## 43 12 **Patient and public involvement**

44  
45  
46  
47 13 No patients were involved in this study.  
48  
49  
50

## 51 14 **Results**

52  
53  
54  
55 15 Table 1 displays the participants' body composition measurements at baseline and  
56  
57  
58  
59 16 follow-up, as well as physical activity measurements at baseline. Boys had a  
60

1 statistically significant increase in all measures of body composition. Girls had a  
 2 statistically significant increase in body weight, BMI, fat mass in kg and FMI, but not  
 3 in LMI and appendicular lean mass. Boys were statistically significantly more  
 4 physically active than girls in some aspects, with higher mean counts per minute  
 5 ( $p=0.01$ ) and more minutes in MVPA ( $p<0.01$ ). Time spent in sedentary- or light  
 6 intensities did not differ significantly between sexes. Twenty-seven percent of boys  
 7 and 17% of girls complied with the recommendations of 60 minutes per day  
 8 Moderate-to-Vigorous Physical Activity (MVPA).

Table 1. Characteristics of the longitudinal cohort of the Tromsø Study; Fit Futures 2010-11 and 2012-13 <sup>◇</sup>.

|                                                        | Boys (n = 171) |              | Girls (n = 260) |              |
|--------------------------------------------------------|----------------|--------------|-----------------|--------------|
|                                                        | FF1            | FF2          | FF1             | FF2          |
| Age (years)                                            | 16.0 (0.4)     | 18.2 (0.4)   | 16.1 (0.4)      | 18.1 (0.4)   |
| Height (cm)                                            | 177.1 (6.6)    | 179.0 (6.5)* | 165.4 (6.6)     | 166.1 (6.6)* |
| Body weight (kg)                                       | 69.0 (12.3)    | 74.3 (13.0)* | 60.8 (10.8)     | 63.4 (11.6)* |
| Body mass index (BMI kg/m <sup>2</sup> )               | 22.0 (3.5)     | 23.2 (3.7)*  | 22.2 (3.7)      | 23.0 (4.0)*  |
| Waist circumference (cm)                               | 81.0 (10.3)    | 83.9 (10.9)* | 76.7 (9.8)      | 78.0 (10.8)* |
| Total Body Fat Mass (kg)                               | 13.3 (9.4)     | 15.6 (10.4)* | 19.9 (8.3)      | 21.7 (9.1)*  |
| Fat Mass Index (FMI kg/m <sup>2</sup> )                | 4.2 (3.0)      | 4.9 (3.2)*   | 7.3 (3.0)       | 7.9 (3.3)*   |
| Total Body Lean Mass (kg)                              | 54.0 (6.5)     | 56.4 (6.9)*  | 38.9 (4.5)      | 39.3 (4.7)*  |
| Lean Mass Index (LMI kg/m <sup>2</sup> )               | 17.2 (1.6)     | 17.6 (1.8)*  | 14.2 (1.3)      | 14.2 (1.4)   |
| Appendicular Lean Mass (kg)                            | 25.3 (3.4)     | 26.2 (3.6)*  | 17.4 (2.3)      | 17.4 (2.3)   |
| Appendicular Lean Mass Index (aLMI kg/m <sup>2</sup> ) | 8.1 (0.9)      | 8.2 (0.9)*   | 6.4 (0.7)       | 6.3 (0.7)*   |

|                                          |                  |  |                            |  |
|------------------------------------------|------------------|--|----------------------------|--|
| Accelerometer variables                  |                  |  |                            |  |
| Wear time per valid day                  | 14.2 (1.2)       |  | 14.1 (1.1)                 |  |
| Counts per minute                        | 362.9<br>(137.5) |  | 334.0 (111.9) <sup>∞</sup> |  |
| Minutes per day in different intensities |                  |  |                            |  |
| Sedentary (cpm 0 – 99)                   | 573.3 (77.3)     |  | 565.3 (63.2)               |  |
| Light (cpm 100 – 1951)                   | 230.5 (58.8)     |  | 236.2 (48.4)               |  |
| Moderate (cpm 1952 – 5723)               | 45.8 (20.6)      |  | 40.2 (17.7) <sup>∞</sup>   |  |
| Vigorous (cpm ≥ 5724)                    | 3.7 (5.8)        |  | 2.9 (4.1) <sup>∞</sup>     |  |
| MVPA <sup>#</sup> (cpm ≥ 1952)           | 49.5 (23.4)      |  | 43.1 (19.6) <sup>∞</sup>   |  |
| Proportion of minutes in MVPA/day        |                  |  |                            |  |
| 0 – 29 minutes                           | 20.5 (35)        |  | 26.5 (69)                  |  |
| 30 – 59 minutes                          | 52.6 (90)        |  | 56.2 (146)                 |  |
| ≥ 60 minutes                             | 26.9 (46)        |  | 17.3 (45) <sup>§</sup>     |  |

1 ∎: Values are means with standard deviation (SD) or prevalence in percentages (n). BMI: body weight  
 2 in kg/height in meters<sup>2</sup>, FMI: fat mass in kg/height in meters<sup>2</sup>, LMI: lean mass in kg/height in meters<sup>2</sup>,  
 3 aLMI: appendicular lean mass in kg/height in meters<sup>2</sup>. Data on physical activity in FF2 was not  
 4 available.

5 \*: Significantly different from baseline measurement ( $p < 0.05$ )

6 ∞: Significantly different from boys (mean).

7 #: MVPA: moderate to vigorous physical activity, using cut-offs suggested by Freedson.[19]

8 §: significantly different linear trend from boys ( $p < 0.05$ )

9 Table 2 displays the association between minutes spent in sedentary activity at  
 10 baseline and changes in body composition between baseline and follow-up. There  
 11 was no association between sedentary activity and changes in BMI, waist  
 12 circumference and FMI in neither boys nor girls. In girls, but not in boys, there was a

- 1 significant association between minutes spent in sedentary activity at baseline and  
 2 changes in both LMI ( $p < 0.01$ ) and aLMI ( $p = 0.02$ ). Adjustment for covariates and  
 3 MVPA slightly attenuated the association with aLMI ( $p = 0.05$ ).

Table 2. Association between minutes per day spent in sedentary activity (CPM 0 – 99) at baseline and changes in body composition#.

|                              | Boys (n = 171) |             |         | Girls (n = 260) |              |         |
|------------------------------|----------------|-------------|---------|-----------------|--------------|---------|
|                              | Beta           | 95% CI      | p value | Beta            | 95% CI       | p value |
| $\Delta$ BMI                 |                |             |         |                 |              |         |
| Model 1                      | -0.02          | -0.13, 0.09 | 0.76    | -0.05           | -0.15, 0.05  | 0.33    |
| Model 2                      | -0.02          | -0.17, 0.12 | 0.75    | -0.11           | -0.24, 0.03  | 0.12    |
| Model 3                      | 0.01           | -0.17, 0.20 | 0.88    | -0.11           | -0.27, 0.05  | 0.16    |
| $\Delta$ waist circumference |                |             |         |                 |              |         |
| Model 1                      | 0.17           | -0.21, 0.56 | 0.37    | -0.01           | -0.41, 0.40  | 0.96    |
| Model 2                      | 0.27           | -0.24, 0.78 | 0.30    | -0.33           | -0.87, 0.20  | 0.22    |
| Model 3                      | 0.42           | -0.23, 1.07 | 0.20    | -0.44           | -1.06, 0.18  | 0.17    |
| $\Delta$ FMI                 |                |             |         |                 |              |         |
| Model 1                      | 0.00           | -0.10, 0.10 | 0.99    | -0.01           | -0.11, 0.08  | 0.83    |
| Model 2                      | -0.02          | -0.16, 0.11 | 0.74    | -0.06           | -0.18, 0.07  | 0.36    |
| Model 3                      | 0.00           | -0.17, 0.17 | 0.98    | -0.05           | -0.20, 0.09  | 0.48    |
| $\Delta$ LMI                 |                |             |         |                 |              |         |
| Model 1                      | 0.00           | -0.05, 0.05 | 0.88    | -0.06           | -0.09, -0.02 | <0.01   |
| Model 2                      | 0.01           | -0.06, 0.07 | 0.77    | -0.07           | -0.12, -0.02 | <0.01   |
| Model 3                      | 0.02           | -0.06, 0.10 | 0.63    | -0.08           | -0.13, -0.03 | <0.01   |

| $\Delta$ aLMI |      |             |      |       |                  |      |
|---------------|------|-------------|------|-------|------------------|------|
| Model 1       | 0.00 | -0.03, 0.03 | 0.84 | -0.02 | -0.04, -<br>0.00 | 0.02 |
| Model 2       | 0.00 | -0.03, 0.04 | 0.81 | -0.03 | -0.05, -<br>0.01 | 0.02 |
| Model 3       | 0.01 | -0.04, 0.05 | 0.71 | -0.03 | -0.06, 0.00      | 0.05 |

#: The table displays the association between minutes spent in sedentary activity and difference in BMI ( $\text{kg}/\text{m}^2$ ), waist circumference, FMI (fat mass in  $\text{kg}/\text{m}^2$ ), LMI (lean mass in  $\text{kg}/\text{m}^2$ ) and aLMI (appendicular lean mass in  $\text{kg}/\text{m}^2$ ) between Fit Futures 1 (2010-2011) and Fit Futures 2 (2012-2013). The models give the beta coefficient for 30 minutes increase in sedentary activity. All models were adjusted for baseline values of the outcome. In model 2 also adjusted for time between measurements and baseline values of screen time on weekdays, study specialisation, age in half-years, regularity of eating breakfast and device wear time. In Model 3 adjusted also for minutes spent in Moderate-to-vigorous physical activity ( $\text{CPM} \geq 1952$ ).

Table 3 displays the association between minutes spent in light activity at baseline and changes in body composition between baseline and follow-up. There was no association between the exposure and either outcome in boys. In girls there was some evidence to suggest an association with change in waist circumference ( $p = 0.05$ ), but the association was attenuated after adjustments ( $p = 0.17$ ). Minutes spent in light physical activity was also associated with changes in LMI ( $p < 0.01$  (Models 2 and 3)) and aLMI ( $p = 0.04$  (Model 2) and  $0.05$  (Model 3)).

Table 3. Association between minutes per day spent in light activity (CPM 100 – 1951) at baseline and changes in body composition#.

|                              | Boys (n = 171) |             |         | Girls (n = 260) |             |         |
|------------------------------|----------------|-------------|---------|-----------------|-------------|---------|
|                              | Beta           | 95% CI      | p value | Beta            | 95% CI      | p value |
| $\Delta$ BMI                 |                |             |         |                 |             |         |
| Model 1                      | 0.04           | -0.11, 0.18 | 0.60    | 0.05            | -0.09, 0.19 | 0.47    |
| Model 2                      | 0.01           | -0.17, 0.18 | 0.93    | 0.12            | -0.04, 0.27 | 0.13    |
| Model 3                      | -0.01          | -0.20, 0.17 | 0.88    | 0.11            | -0.05, 0.27 | 0.16    |
| $\Delta$ waist circumference |                |             |         |                 |             |         |
| Model 1                      | -0.11          | -0.62, 0.40 | 0.68    | 0.54            | 0.01, 1.07  | 0.05    |
| Model 2                      | -0.38          | -1.00, 0.23 | 0.22    | 0.43            | -0.19, 1.05 | 0.17    |
| Model 3                      | -0.42          | -1.07, 0.23 | 0.20    | 0.44            | -0.19, 1.06 | 0.17    |
| $\Delta$ FMI                 |                |             |         |                 |             |         |
| Model 1                      | 0.03           | -0.10, 0.16 | 0.67    | 0.02            | -0.10, 0.15 | 0.71    |
| Model 2                      | 0.01           | -0.15, 0.18 | 0.87    | 0.06            | -0.09, 0.20 | 0.43    |
| Model 3                      | -0.00          | -0.17, 0.17 | 0.98    | 0.05            | -0.09, 0.20 | 0.49    |
| $\Delta$ LMI                 |                |             |         |                 |             |         |
| Model 1                      | -0.01          | -0.07, 0.06 | 0.84    | 0.04            | -0.01, 0.09 | 0.08    |
| Model 2                      | -0.02          | -0.09, 0.06 | 0.67    | 0.08            | 0.03, 0.13  | <0.01   |
| Model 3                      | -0.02          | -0.10, 0.06 | 0.63    | 0.08            | 0.03, 0.13  | <0.01   |
| $\Delta$ aLMI                |                |             |         |                 |             |         |

|         |       |                |      |      |             |      |
|---------|-------|----------------|------|------|-------------|------|
| Model 1 | 0.00  | -0.03,<br>0.04 | 0.87 | 0.02 | -0.01, 0.04 | 0.16 |
| Model 2 | -0.01 | -0.05,<br>0.04 | 0.73 | 0.03 | 0.00, 0.06  | 0.04 |
| Model 3 | -0.01 | -0.05,<br>0.04 | 0.70 | 0.03 | -0.00, 0.06 | 0.05 |

#: The table displays the association between minutes spent in light activity and difference in BMI (kg/m<sup>2</sup>), waist circumference, FMI (fat mass in kg/m<sup>2</sup>), LMI (lean mass in kg/m<sup>2</sup>) and aLMI (appendicular lean mass in kg/m<sup>2</sup>) between Fit Futures 1 (2010-2011) and Fit Futures 2 (2012-2013). The models give the beta coefficient for 30 minutes increase in light activity. All models were adjusted for baseline values of the outcome. In model 2 also adjusted for time between measurements and baseline values of screen time on weekdays, study specialisation, age in half-years, regularity of eating breakfast and device wear time. In Model 3 adjusted also for minutes spent in Moderate-to-vigorous physical activity (CPM  $\geq$  1952).

Table 4 displays the association between minutes in MVPA at baseline and changes in body composition between baseline and follow-up. There was no association between time spent in MVPA and changes in either measure of body composition for either sex.

Table 4. Association between minutes per day spent in MVPA (CPM  $\geq$  1952) at baseline and changes in body composition#.

|              | Boys (n = 171) |                |         | Girls (n = 260) |             |         |
|--------------|----------------|----------------|---------|-----------------|-------------|---------|
|              | Beta           | 95% CI         | p value | Beta            | 95% CI      | p value |
| $\Delta$ BMI |                |                |         |                 |             |         |
| Model 1      | 0.11           | -0.07,<br>0.30 | 0.22    | -0.00           | -0.17, 0.16 | 0.97    |
| Model 2      | 0.08           | -0.13,<br>0.29 | 0.47    | 0.07            | -0.11, 0.25 | 0.47    |

|                              |       |             |      |       |             |      |  |
|------------------------------|-------|-------------|------|-------|-------------|------|--|
| $\Delta$ waist circumference |       |             |      |       |             |      |  |
| Model 1                      | 0.25  | -0.39, 0.89 | 0.44 | -0.03 | -0.68, 0.63 | 0.94 |  |
| Model 2                      | -0.02 | -0.75, 0.71 | 0.95 | 0.02  | -0.70, 0.74 | 0.96 |  |
| $\Delta$ FMI                 |       |             |      |       |             |      |  |
| Model 1                      | 0.02  | -0.15, 0.19 | 0.83 | -0.01 | -0.17, 0.14 | 0.86 |  |
| Model 2                      | 0.06  | -0.14, 0.25 | 0.57 | 0.05  | -0.12, 0.22 | 0.54 |  |
| $\Delta$ LMI                 |       |             |      |       |             |      |  |
| Model 1                      | 0.07  | -0.02, 0.15 | 0.11 | 0.03  | -0.03, 0.09 | 0.33 |  |
| Model 2                      | 0.01  | -0.08, 0.10 | 0.86 | 0.02  | -0.04, 0.09 | 0.44 |  |
| $\Delta$ aLMI                |       |             |      |       |             |      |  |
| Model 1                      | 0.03  | -0.02, 0.08 | 0.19 | 0.02  | -0.01, 0.05 | 0.13 |  |
| Model 2                      | 0.00  | -0.05, 0.05 | 0.92 | 0.02  | -0.01, 0.05 | 0.18 |  |

#: The table displays the association between minutes spent in moderate-to-vigorous physical activity (MVPA) and difference in BMI (kg/m<sup>2</sup>), waist circumference, FMI (fat mass in kg/m<sup>2</sup>), LMI (lean mass in kg/m<sup>2</sup>) and aLMI (appendicular lean mass in kg/m<sup>2</sup>) between Fit Futures 1 (2010-2011) and Fit Futures 2 (2012-2013). The models give the beta coefficient for 15 minutes increase in MVPA. Both models were adjusted for baseline values of the outcome. In model 2 also adjusted for time between measurements and baseline values of screen time on weekdays, study specialisation, age in half-years, regularity of eating breakfast and device wear time.

In Appendix Table 1-3, the analyses which gave the results displayed in Tables 2-4 were repeated with adjustment for pubertal development in those with complete data.



1  
2  
3  
4 1 Overall, adjustment for pubertal development had no substantial impact on an  
5  
6  
7 2 association between sedentary, light and moderate-to-vigorous physical activity and  
8  
9  
10 3 changes in body composition for either sex in complete case analyses. However, the  
11  
12  
13  
14 4 association between minutes spent in sedentary activity- and light activity and  
15  
16  
17 5 changes in appendicular lean mass index was no longer significant for girls in Model  
18  
19  
20  
21 6 3. The point estimates did not differ from those from analyses without adjustments for  
22  
23  
24  
25 7 pubertal development, however.  
26  
27

## 28 8 **Discussion**

29  
30  
31  
32 9 In this longitudinal population-based study of Norwegian adolescents there were no  
33  
34  
35  
36 10 associations between objectively measured physical activity and change in BMI,  
37  
38  
39  
40 11 waist circumference and FMI for either sex at two years of follow up. Both boys and  
41  
42  
43 12 girls had statistically significant increases in the measures of body composition  
44  
45  
46 13 (except lean mass index and appendicular lean mass in girls). Objectively measured  
47  
48  
49  
50 14 physical activity did not predict changes in boys. In girls there was a weak  
51  
52  
53  
54 15 association between minutes spent in sedentary- and light physical activity and  
55  
56  
57 16 changes in indices of lean mass.  
58  
59  
60

1  
2  
3  
4 1 Although the magnitude of change differed, both sexes experienced increases in  
5  
6  
7 2 measures of body composition. In boys, FMI increased by 0.7 units, (+ 16.7%),  
8  
9  
10 3 whereas LMI increased by 0.4 units (+ 2.3 %) from baseline. Similar relative  
11  
12  
13  
14 4 changes were observed in girls, (FMI +8.2 %) and (LMI + 0.7%), indicating that FMI  
15  
16  
17 5 increases more than LMI during late adolescence. We observed statistically  
18  
19  
20  
21 6 significant differences in minutes spent in moderate ( $p < 0.01$ ) and vigorous ( $p =$   
22  
23  
24 7 0.04) intensity between boys and girls, but time spent in other intensity levels did not  
25  
26  
27  
28 8 differ. Discrepancies in physical activity by sex is consistent with previous  
29  
30  
31 9 research.[22, 23] Differences in changes in body composition by sex are biologically  
32  
33  
34  
35 10 determined during adolescence, with sex hormones resulting in fat mass accrual in  
36  
37  
38 11 girls and lean mass accrual in boys.[24, 25] The observation that sedentary- and light  
39  
40  
41  
42 12 activity predicted changes in indices of lean mass in girls, but not boys, may be  
43  
44  
45 13 explained by these expected biological differences. Physical activity may have  
46  
47  
48  
49 14 somewhat greater potential to influence lean mass accrual in girls than in boys during  
50  
51  
52 15 this period, as fat-free mass is relatively stable in girls in late adolescence whereas it  
53  
54  
55  
56 16 increases up to 18 years of age in boys.[26]  
57  
58  
59  
60

1  
2  
3  
4 1 In the present study sedentary- and light activity had opposing effects on lean mass  
5  
6  
7 2 in girls. In a study using iso-temporal substitution models, positive prospective effects  
8  
9  
10 3 on fat mass was found when substituting 30 minutes of sedentary activity with MVPA,  
11  
12  
13  
14 4 but not when substituted with light activity.[27] We did not use such modelling  
15  
16  
17 5 techniques, but it is reasonable that sedentary- and light physical activity have  
18  
19  
20  
21 6 opposing effects on lean mass.[28] Sedentary- and light activity was correlated ( $r = -$   
22  
23  
24 7 0.39), but minutes spent in different intensity levels are not directly a function of each  
25  
26  
27  
28 8 other as wear time in the participants varies between individuals. Based on wear time  
29  
30  
31 9 inclusion criteria, the theoretical time span for wear time lies between 10 and 24  
32  
33  
34  
35 10 hours. Thus, minutes spent in sedentary activity may not be deduced from the sum of  
36  
37  
38  
39 11 minutes spent in other intensities and vice versa, but it is plausible that higher wear  
40  
41  
42  
43 12 time results in more sedentary time. This was evident in an exploratory analyses on  
44  
45  
46 13 the same cohort (not included in the present study), where higher wear time was  
47  
48  
49 14 significantly associated with more sedentary activity and less light activity ( $p < 0.01$ ).  
50  
51  
52 15 Adjusting for wear time (Models 2) did not change the associations substantially for  
53  
54  
55  
56 16 sedentary activity (Table 2), but had some effect on the associations with light  
57  
58  
59 17 physical activity (Table 3). Because of the inverse relationship between minutes  
60

1  
2  
3  
4 1 spent sedentary and in light activity, it is not possible to determine whether it is  
5  
6  
7 2 sedentary time or light activity-time that is associated with change in LMI. The  
8  
9  
10 3 practical consequences are nevertheless that being active increases lean mass in  
11  
12  
13  
14 4 girls.

15  
16  
17  
18 5 When interpreting results, we must acknowledge the limitations of DXA in the  
19  
20  
21 6 estimation of lean mass, which can be affected by both biological factors and  
22  
23  
24  
25 7 measurement error.[29] Because the relative increase in lean mass was small, only  
26  
27  
28 8 slight differences in for instance individual hydration status at the two time-points may  
29  
30  
31  
32 9 influence estimates and thus the association.

33  
34  
35  
36 10 There was no associations between objectively measured physical activity and  
37  
38  
39 11 change in BMI, waist circumference and FMI for either sex. It may be that the  
40  
41  
42  
43 12 negative effects of less physical activity have not yet had time to manifest themselves  
44  
45  
46  
47 13 in a population still undergoing physiological changes as a result of natural growth,  
48  
49  
50 14 especially considering the relatively short follow-up. Our results are in line with a  
51  
52  
53  
54 15 systematic review suggesting that objectively measured PA is not an important  
55  
56  
57 16 predictor of change in adiposity in children, adolescents and adults.[12] In contrast,  
58  
59  
60

1  
2  
3  
4 1 another systematic review found a protective effect of physical activity on adiposity in  
5  
6  
7 2 adolescents.[10] There were however several methodological weaknesses in the  
8  
9  
10 3 included studies of this review, particularly regarding the validity of the measurement  
11  
12  
13  
14 4 of both physical activity and body composition. In contrast, our study employed  
15  
16  
17 5 robust measures of both these exposures- and outcomes, a combination which is  
18  
19  
20  
21 6 lacking in much past research on the association between the two.[10-12]  
22  
23  
24  
25 7 In adolescents, physical activity is influenced by friends, family and other social  
26  
27  
28 8 support,[30] and is less stable than in adults.[31-33] Follow-up data on objectively  
29  
30  
31  
32 9 measured physical activity was not available in the present study. Observations from  
33  
34  
35  
36 10 the same cohort showed that change in self-reported physical activity between  
37  
38  
39 11 baseline and follow-up was a stronger predictor of change in body composition than  
40  
41  
42 12 self-reported baseline physical activity[34]. Other studies have suggested that  
43  
44  
45  
46 13 change in activity during follow-up might obscure an association with body  
47  
48  
49 14 composition.[35, 36] In a subset of analyses, one of four in both the highest and  
50  
51  
52  
53 15 lowest categories of MVPA at baseline reported decreased (high MVPA at baseline)  
54  
55  
56 16 and increased (low MVPA at baseline) self-reported physical activity at follow up,  
57  
58  
59  
60 17 thus indicating that physical activity in adolescents is fluctuant. These two

1 observations, assuming that measurement of both MVPA and self-reported hours per  
2 week of physical activity are representative of actual physical activity behavior at the  
3 time, work in opposing directions with regard to the effect of physical activity on  
4 changes in adiposity. This phenomenon is known as regression dilution bias and  
5 may flatten the regression slope and cause an underestimate of the actual  
6 association.[37] With an annual decline in total physical activity of 7% in adolescents,  
7 researchers must consider the possibility that measured physical activity has a “best  
8 before-date”. It remains questionable whether baseline measurements of a fluctuant  
9 behavior such as physical activity is representative of actual habits during the period  
10 of follow-up. It may be that the measurement represents current, but not future (or  
11 even prior) habits.[12, 38] This has implications for longitudinal studies of the  
12 relationship between physical activity and body composition.[36]

### 14 Strengths and limitations

15 The primary strength of this study are objective measures of both exposure and  
16 outcome, and the use of tissue-specific measures of body composition. Some

1  
2  
3  
4 1 limitations have to be considered. As the Fit Futures study did not include a validated  
5  
6  
7 2 food frequency questionnaire or similar instrument for nutritional assessment, we  
8  
9  
10 3 were not able to fully adjust for the potential confounding effects of nutrition and  
11  
12  
13  
14 4 changes in food habits of adolescents on changes in body composition.

15  
16  
17 5 Accelerometer-measured physical activity has limitations. A hip worn accelerometer  
18  
19  
20 6 such as the ActiGraph GT3X is not able to correctly measure cycling and  
21  
22  
23  
24 7 swimming.[39] Furthermore, accelerometers are dependent on user-compliance, and  
25  
26  
27 8 non-wear time therefore affects the amount of activity which is actually measured.

28  
29  
30  
31 9 Subjective judgement determines data management and analyses, e.g. the decision  
32  
33  
34  
35 10 to exclude participants with wear time < 10 hours and < 4 consecutive days, is a  
36  
37  
38 11 trade-off between quality of data and the number of participants with valid data. We  
39  
40  
41  
42 12 lacked complete data on physical activity and adjustment variables in 212  
43  
44  
45 13 participants, but changes in BMI, waist circumference, FMI, LMI (except in girls,  $p =$   
46  
47  
48 14 0.04) and aLMI were not significantly different between those with- and without  
49  
50  
51  
52 15 complete exposure data. Lastly, although longitudinal observational studies are  
53  
54  
55  
56 16 superior to cross-sectional studies to examine causation, they are also susceptible to  
57  
58  
59  
60

1  
2  
3  
4 1 directional bias, since participants may avoid physical activity because they are  
5  
6  
7 2 overweight, and not be overweight because they are inactive.[40, 41]  
8  
9  
10  
11 3  
12  
13  
14

#### 15 4 **Conclusion**

16  
17  
18  
19 5 Objectively measured physical activity was not significantly associated with change in  
20  
21  
22  
23 6 objectively measured BMI, waist circumference or FMI after two years in this cohort  
24  
25  
26 7 of Norwegian adolescents. There was evidence to suggest that sedentary- and light  
27  
28  
29  
30 8 activity affected indices of lean mass in girls, but not boys.  
31  
32  
33  
34 9  
35  
36  
37  
38 10  
39  
40  
41  
42  
43  
44  
45  
46  
47  
48  
49  
50  
51  
52  
53  
54  
55  
56  
57  
58  
59  
60



## 1 Acknowledgements

2  
3  
4  
5  
6  
7  
8 2 The authors thank the participants in the study, as well as the staff at the Clinical  
9  
10  
11 3 Research Unit at the University Hospital of North Norway for data collection and  
12  
13  
14 4 clinical measurements. We also thank the Fit Futures Steering Committee in both  
15  
16  
17  
18 5 studies.  
19  
20  
21

## 22 Footnotes

### 23 Contributors

24  
25  
26  
27  
28  
29  
30 8 NAA wrote the draft of the manuscript, which was revised and edited by all authors  
31  
32  
33  
34 9 several times during the process. SB produced the accelerometer variables in close  
35  
36  
37  
38 10 collaboration with AH, who wrote the software which converted raw accelerometer  
39  
40  
41 11 data to variables. BKJ contributed to the statistical analyses, and BM specifically  
42  
43  
44  
45 12 contributed to the discussion of physical activity. NE and ASF were among the  
46  
47  
48 13 principal investigators in FF1 and FF2 and contributed significantly to the acquisition  
49  
50  
51 14 of data. SG formulated the research question and conceived the study. All authors  
52  
53  
54  
55 15 have substantially contributed to the study, and have read and approved the final  
56  
57  
58 16 manuscript.  
59  
60

1  
2  
3  
4 1 Funding  
5  
6  
7

8 2 This particular manuscript has not received any specific funding, while the Fit Futures  
9  
10  
11 3 surveys were funded by, *inter alia*, the Northern Norway Regional Health Authority  
12  
13  
14 4 and UiT – The Arctic University of Norway, Tromsø, the National Public Health  
15  
16  
17  
18 5 Institute, Oslo, and the Troms County Council.  
19  
20  
21

22 6 Competing interests  
23  
24  
25

26 7 The authors declare that they have no competing interests.  
27  
28  
29

30 8 Consent for publication  
31  
32  
33

34 9 Not applicable  
35  
36  
37

38  
39 10 Ethics approval  
40  
41  
42

43 11 This study was approved by The Regional Committee of Medical and Health  
44  
45  
46 12 Research Ethics (2014/1666/REK nord).  
47  
48  
49

50 13 Data availability statement  
51  
52  
53  
54  
55  
56  
57  
58  
59  
60

1  
2  
3  
4  
5  
6  
7  
8  
9  
10  
11  
12  
13  
14  
15  
16  
17  
18  
19  
20  
21  
22  
23  
24  
25  
26  
27  
28  
29  
30  
31  
32  
33  
34  
35  
36  
37  
38  
39  
40  
41  
42  
43  
44  
45  
46  
47  
48  
49  
50  
51  
52  
53  
54  
55  
56  
57  
58  
59  
60

- 1 The data that support the findings of this study are available from UiT – The Arctic
- 2 University of Norway. Restrictions apply to the availability of these data, which were
- 3 used under license for the current study, and are thus not publicly available.

For peer review only

## 1 References

- 1 1. World Health Organization. Global action plan on physical activity 2018–2030:  
2 more active people for a healthier world. Geneva 2018.
- 3 2. Lee IM, Shiroma EJ, Lobelo F, et al. Effect of physical inactivity on major non-  
4 communicable diseases worldwide: an analysis of burden of disease and life  
5 expectancy. *Lancet* 2012;380:219-29.
- 6 3. World Health Organization. Global Recommendations on Physical Activity for  
7 Health. WHO Guidelines. Geneva 2010.
- 8 4. Kolle E SJ, Hansen BH, Anderssen SA. [Fysisk aktivitet blant 6-, 9- og 15-åringer i  
9 Norge. Resultater fra en kartlegging i 2011]. The Norwegian Directorate of Health,  
10 Oslo, Norway. 2012.
- 11 5. Dumith SC, Gigante DP, Domingues MR, et al. Physical activity change during  
12 adolescence: a systematic review and a pooled analysis. *Int J Epidemiol.*  
13 2011;40:685-98.
- 14 6. Collings PJ, Wijndaele K, Corder K, et al. Magnitude and determinants of change  
15 in objectively-measured physical activity, sedentary time and sleep duration from  
16

- 1  
2  
3  
4 1 ages 15 to 17.5y in UK adolescents: the ROOTS study. *Int J Behav Nutr Phys Act.*  
5  
6  
7 2 2015;12:61.  
8  
9  
10 3 7. Crane J, Temple V. A systematic review of dropout from organized sport among  
11  
12  
13  
14 4 children and youth. *Eur Phys Educ Rev.* 2015;21:114-31.  
15  
16  
17 5 8. Ng M, Fleming T, Robinson M, et al. Global, regional, and national prevalence of  
18  
19  
20  
21 6 overweight and obesity in children and adults during 1980-2013: a systematic  
22  
23  
24 7 analysis for the Global Burden of Disease Study 2013. *Lancet.* 2014;384:766-81.  
25  
26  
27  
28 8 9. NCD Risk Factor Collaboration (NCD-RisC). Worldwide trends in body-mass  
29  
30  
31 9 index, underweight, overweight, and obesity from 1975 to 2016: a pooled analysis of  
32  
33  
34  
35 10 2416 population-based measurement studies in 128.9 million children, adolescents,  
36  
37  
38  
39 11 and adults. *Lancet.* 2017. doi:10.1016/S0140-6736(17)32129-3.  
40  
41  
42 12 10. Reichert FF, Baptista Menezes AM, Wells JC, et al. Physical activity as a  
43  
44  
45 13 predictor of adolescent body fatness: a systematic review. *Sports Med.* 2009;39:279-  
46  
47  
48  
49 14 94.  
50  
51  
52 15 11. Jimenez-Pavon D, Kelly J, Reilly JJ. Associations between objectively measured  
53  
54  
55  
56 16 habitual physical activity and adiposity in children and adolescents: Systematic  
57  
58  
59 17 review. *Int J Pediatr Obes.* 2010;5:3-18.  
60

- 1  
2  
3  
4 1 12. Wilks DC, Besson H, Lindroos AK, et al. Objectively measured physical activity  
5  
6  
7 2 and obesity prevention in children, adolescents and adults: a systematic review of  
8  
9  
10 3 prospective studies. *Obes Rev.* 2011;12:e119-29.  
11  
12  
13  
14 4 13. Dyrstad SM, Hansen BH, Holme IM, et al. Comparison of self-reported versus  
15  
16  
17 5 accelerometer-measured physical activity. *Med Sci Sports Exerc.* 2014;46:99-106.  
18  
19  
20  
21 6 14. Aars NA, Jacobsen BK, Furberg AS, et al. Self-reported physical activity during  
22  
23  
24 7 leisure time was favourably associated with body composition in Norwegian  
25  
26  
27 8 adolescents. *Acta Paediatr.* 2018. doi:10.1111/apa.14660.  
28  
29  
30  
31 9 15. Goulding A, Taylor RW, Grant AM, et al. Relationships of appendicular LMI and  
32  
33  
34 10 total body LMI to bone mass and physical activity levels in a birth cohort of New  
35  
36  
37 11 Zealand five-year olds. *Bone.* 2009;45:455-9.  
38  
39  
40  
41  
42 12 16. Bridge P, Pocock NA, Nguyen T, et al. Validation of longitudinal DXA changes in  
43  
44  
45 13 body composition from pre- to mid-adolescence using MRI as reference. *J Clin*  
46  
47  
48 14 *Densitom.* 2011;14:340-7.  
49  
50  
51  
52 15 17. Trost SG, Pate RR, Freedson PS, et al. Using objective physical activity  
53  
54  
55 16 measures with youth: how many days of monitoring are needed? *Med Sci Sports*  
56  
57  
58 17 *Exerc.* 2000;32:426-31.  
59  
60

- 1  
2  
3  
4 1 18. Hecht A, Ma S, Porszasz J, et al. Methodology for using long-term accelerometry  
5  
6  
7 2 monitoring to describe daily activity patterns in COPD. *COPD*. 2009;6:121-9.  
8  
9  
10 3 19. Freedson PS, Melanson E, Sirard J. Calibration of the Computer Science and  
11  
12  
13 4 Applications, Inc. accelerometer. *Med Sci Sports Exerc*. 1998;30:777-81.  
14  
15  
16  
17 5 20. Sasaki JE, John D, Freedson PS. Validation and comparison of ActiGraph activity  
18  
19  
20 6 monitors. *J Sci Med Sport*. 2011;14:411-6.  
21  
22  
23  
24 7 21. Cuzick J. A Wilcoxon-type test for trend. *Stat Med*. 1985;4:87-90.  
25  
26  
27  
28 8 22. Kolle E, Steene-Johannessen J, Andersen LB, et al. Objectively assessed  
29  
30  
31 9 physical activity and aerobic fitness in a population-based sample of Norwegian 9-  
32  
33  
34 10 and 15-year-olds. *Scand J Med Sci Sports*. 2010;20:e41-7.  
35  
36  
37  
38 11 23. Van Hecke L, Loyen A, Verloigne M, et al. Variation in population levels of  
39  
40  
41 12 physical activity in European children and adolescents according to cross-European  
42  
43  
44 13 studies: a systematic literature review within DEDIPAC. *Int J Behav Nutr Phys Act*.  
45  
46  
47 14 2016;13:70.  
48  
49  
50  
51  
52 15 24. Baxter-Jones AD, Eisenmann JC, Mirwald RL, et al. The influence of physical  
53  
54  
55 16 activity on lean mass accrual during adolescence: a longitudinal analysis. *J Appl*  
56  
57  
58 17 *Physiol (1985)*. 2008;105:734-41.  
59  
60

- 1  
2  
3  
4 1 25. Wohlfahrt-Veje C, Tinggaard J, Winther K, et al. Body fat throughout childhood in  
5  
6  
7 2 2647 healthy Danish children: agreement of BMI, waist circumference, skinfolds with  
8  
9  
10 3 dual X-ray absorptiometry. *Eur J Clin Nutr.* 2014;68:664-70.  
11  
12  
13  
14 4 26. Siervogel RM, Demerath EW, Schubert C, et al. Puberty and body composition.  
15  
16  
17 5 *Horm Res.* 2003;60:36-45.  
18  
19  
20  
21 6 27. Sardinha LB, Marques A, Minderico C, et al. Cross-sectional and prospective  
22  
23  
24 7 impact of reallocating sedentary time to physical activity on children's body  
25  
26  
27 8 composition. *Pediatr Obes.* 2017;12:373-9.  
28  
29  
30  
31 9 28. Kenney WL, Wilmore JH, Costill DL. Physiology of sport and exercise. Seventh  
32  
33  
34 10 edition. Champaign, IL: Human Kinetics; 2020.  
35  
36  
37  
38 11 29. Lohman TG, Milliken LA. ACSM's body composition assessment. Champaign, IL:  
39  
40  
41 12 Human Kinetics; 2020.  
42  
43  
44  
45 13 30. Mendonca G, Cheng LA, Melo EN, et al. Physical activity and social support in  
46  
47  
48 14 adolescents: a systematic review. *Health Educ Res.* 2014;29:822-39.  
49  
50  
51  
52 15 31. Telama R, Yang X. Decline of physical activity from youth to young adulthood in  
53  
54  
55 16 Finland. *Med Sci Sports Exerc.* 2000;32:1617-22.  
56  
57  
58  
59  
60



- 1  
2  
3  
4 1 32. Varma VR, Dey D, Leroux A, et al. Re-evaluating the effect of age on physical  
5  
6  
7 2 activity over the lifespan. *Prev Med.* 2017;101:102-8.  
8  
9  
10 3 33. Caspersen CJ, Pereira MA, Curran KM. Changes in physical activity patterns in  
11  
12  
13 4 the United States, by sex and cross-sectional age. *Med Sci Sports Exerc.*  
14  
15  
16  
17 5 2000;32:1601-9.  
18  
19  
20  
21 6 34. Aars NA, Jacobsen BK, Morseth B, et al. Longitudinal changes in body  
22  
23  
24 7 composition and waist circumference by self-reported levels of physical activity in  
25  
26  
27  
28 8 leisure among adolescents: the Tromsø study, Fit Futures. *BMC Sports Sci Med*  
29  
30  
31 9 *Rehabil.* 2019;11:37.  
32  
33  
34  
35 10 35. O'Loughlin J, Gray-Donald K, Paradis G, et al. One- and two-year predictors of  
36  
37  
38 11 excess weight gain among elementary schoolchildren in multiethnic, low-income,  
39  
40  
41  
42 12 inner-city neighborhoods. *Am J Epidemiol.* 2000;152:739-46.  
43  
44  
45 13 36. Collings PJ, Wijndaele K, Corder K, et al. Objectively measured physical activity  
46  
47  
48 14 and longitudinal changes in adolescent body fatness: an observational cohort study.  
49  
50  
51  
52 15 *Pediatr Obes.* 2016;11:107-14.  
53  
54  
55  
56 16 37. Hutcheon JA, Chiolero A, Hanley JA. Random measurement error and regression  
57  
58  
59 17 dilution bias. *BMJ.* 2010;340:c2289.  
60

- 1  
2  
3  
4 1 38. Kettaneh A, Oppert JM, Heude B, et al. Changes in physical activity explain  
5  
6  
7 2 paradoxical relationship between baseline physical activity and adiposity changes in  
8  
9  
10 3 adolescent girls: the FLVS II study. *Int J Obes (Lond)*. 2005;29:586-93.  
11  
12  
13 4 39. Herman Hansen B, Bortnes I, Hildebrand M, et al. Validity of the ActiGraph GT1M  
14  
15  
16  
17 5 during walking and cycling. *J Sports Sci*. 2014;32:510-6.  
18  
19  
20 6 40. van Sluijs EM, Sharp SJ, Ambrosini GL, et al. The independent prospective  
21  
22  
23  
24 7 associations of activity intensity and dietary energy density with adiposity in young  
25  
26  
27  
28 8 adolescents. *Br J Nutr*. 2016;115:921-9.  
29  
30  
31 9 41. Hjorth MF, Chaput JP, Ritz C, et al. Fatness predicts decreased physical activity  
32  
33  
34  
35 10 and increased sedentary time, but not vice versa: support from a longitudinal study in  
36  
37  
38  
39 11 8- to 11-year-old children. *Int J Obes (Lond)*. 2014;38:959-65.  
40  
41  
42  
43 12  
44  
45  
46  
47  
48  
49  
50  
51  
52  
53  
54  
55  
56  
57  
58  
59  
60

## Appendix

Appendix Table 1. Association between minutes per day spent in sedentary activity (CPM 0 – 99) at baseline and changes in body composition, adjusted for puberty#.

|                              | Boys (n = 143) |             |         | Girls (n = 256) |              |         |
|------------------------------|----------------|-------------|---------|-----------------|--------------|---------|
|                              | Beta           | 95% CI      | p value | Beta            | 95% CI       | p value |
| $\Delta$ BMI                 |                |             |         |                 |              |         |
| Model 1                      | -0.02          | -0.14, 0.09 | 0.70    | -0.05           | -0.15, 0.05  | 0.32    |
| Model 2                      | -0.02          | -0.17, 0.13 | 0.82    | -0.10           | -0.24, 0.03  | 0.14    |
| Model 3                      | 0.02           | -0.18, 0.22 | 0.85    | -0.10           | -0.26, 0.06  | 0.20    |
| $\Delta$ waist circumference |                |             |         |                 |              |         |
| Model 1                      | 0.12           | -0.27, 0.51 | 0.55    | -0.01           | -0.42, 0.40  | 0.96    |
| Model 2                      | 0.24           | -0.28, 0.76 | 0.37    | -0.38           | -0.92, 0.16  | 0.16    |
| Model 3                      | 0.38           | -0.30, 1.05 | 0.27    | -0.52           | -1.15, 0.11  | 0.10    |
| $\Delta$ FMI                 |                |             |         |                 |              |         |
| Model 1                      | -0.01          | -0.12, 0.09 | 0.84    | -0.01           | -0.11, 0.08  | 0.80    |
| Model 2                      | -0.02          | -0.16, 0.13 | 0.83    | -0.06           | -0.18, 0.07  | 0.36    |
| Model 3                      | 0.01           | -0.18, 0.19 | 0.96    | -0.05           | -0.20, 0.10  | 0.49    |
| $\Delta$ LMI                 |                |             |         |                 |              |         |
| Model 1                      | 0.00           | -0.05, 0.06 | 0.90    | -0.06           | -0.09, -0.02 | < 0.01  |
| Model 2                      | 0.00           | -0.07, 0.08 | 0.90    | -0.07           | -0.11, -0.02 | < 0.01  |
| Model 3                      | 0.02           | -0.07, 0.10 | 0.73    | -0.07           | -0.13, -0.02 | < 0.01  |
| $\Delta$ aLMI                |                |             |         |                 |              |         |
| Model 1                      | -0.00          | -0.03, 0.03 | 0.91    | -0.02           | -0.04, 0.00  | 0.02    |

|         |      |             |      |       |                  |      |
|---------|------|-------------|------|-------|------------------|------|
| Model 2 | 0.00 | -0.04, 0.04 | 0.97 | -0.03 | -0.05, -<br>0.00 | 0.03 |
| Model 3 | 0.01 | -0.04, 0.06 | 0.65 | -0.03 | -0.05, 0.00      | 0.08 |

#: The table displays the association between minutes spent in sedentary activity and difference in BMI (kg/m<sup>2</sup>), waist circumference, FMI (fat mass in kg/m<sup>2</sup>), LMI (lean mass in kg/m<sup>2</sup>) and aLMI (appendicular lean mass in kg/m<sup>2</sup>) between Fit Futures 1 (2010-2011) and Fit Futures 2 (2012-2013). The models give the beta coefficient for 30 minutes increase in sedentary activity. All models were adjusted for baseline values of the outcome. In model 2 also adjusted for time between measurements and baseline values of pubertal development (pds (boys) and age at menarche (girls)), screen time on weekdays, study specialisation, age in half-years, regularity of eating breakfast and device wear time. In Model 3 adjusted also for minutes spent in Moderate-to-vigorous physical activity (CPM ≥ 1952).

Appendix Table 2. Association between minutes per day spent in light activity (CPM 100 – 1951) at baseline and changes in body composition, adjusted for puberty#.

|                              | Boys ( n = 143) |             |         | Girls (n = 256) |             |         |
|------------------------------|-----------------|-------------|---------|-----------------|-------------|---------|
|                              | Beta            | 95% CI      | p value | Beta            | 95% CI      | p value |
| $\Delta$ BMI                 |                 |             |         |                 |             |         |
| Model 1                      | 0.05            | -0.10, 0.20 | 0.53    | 0.04            | -0.10, 0.18 | 0.56    |
| Model 2                      | 0.00            | -0.18, 0.19 | 0.98    | 0.11            | -0.05, 0.27 | 0.17    |
| Model 3                      | -0.02           | -0.22, 0.18 | 0.85    | 0.10            | -0.06, 0.26 | 0.20    |
| $\Delta$ waist circumference |                 |             |         |                 |             |         |
| Model 1                      | -0.01           | -0.53, 0.51 | 0.97    | 0.53            | -0.01, 1.06 | 0.05    |
| Model 2                      | -0.34           | -0.97, 0.29 | 0.29    | 0.51            | -0.11, 1.13 | 0.11    |
| Model 3                      | -0.38           | -1.05, 0.30 | 0.27    | 0.52            | -0.11, 1.15 | 0.11    |
| $\Delta$ FMI                 |                 |             |         |                 |             |         |
| Model 1                      | 0.05            | -0.09, 0.18 | 0.51    | 0.02            | -0.11, 0.14 | 0.80    |
| Model 2                      | 0.01            | -0.16, 0.18 | 0.93    | 0.06            | -0.09, 0.20 | 0.43    |
| Model 3                      | -0.01           | -0.19, 0.18 | 0.96    | 0.05            | -0.10, 0.20 | 0.49    |
| $\Delta$ LMI                 |                 |             |         |                 |             |         |
| Model 1                      | -0.01           | -0.08, 0.06 | 0.84    | 0.04            | -0.01, 0.09 | 0.09    |
| Model 2                      | -0.01           | -0.10, 0.07 | 0.80    | 0.08            | 0.02, 0.13  | < 0.01  |

|  |               |       |                |      |      |             |        |
|--|---------------|-------|----------------|------|------|-------------|--------|
|  | Model 3       | -0.02 | -0.10,<br>0.07 | 0.73 | 0.07 | 0.02, 0.13  | < 0.01 |
|  | $\Delta$ aLMI |       |                |      |      |             |        |
|  | Model 1       | 0.00  | -0.04,<br>0.04 | 0.93 | 0.02 | -0.01, 0.04 | 0.19   |
|  | Model 2       | -0.01 | -0.05,<br>0.04 | 0.78 | 0.03 | -0.00, 0.06 | 0.06   |
|  | Model 3       | -0.01 | -0.06,<br>0.04 | 0.65 | 0.03 | -0.00, 0.05 | 0.08   |

#: The table displays the association between minutes spent in light activity and difference in BMI (kg/m<sup>2</sup>), waist circumference, FMI (fat mass in kg/m<sup>2</sup>), LMI (lean mass in kg/m<sup>2</sup>) and aLMI (appendicular lean mass in kg/m<sup>2</sup>) between Fit Futures 1 (2010-2011) and Fit Futures 2 (2012-2013). The models give the beta coefficient for 30 minutes increase in light activity. All models were adjusted for baseline values of the outcome. In model 2 also adjusted for time between measurements and baseline values of pubertal development (pds (boys) and age at menarche (girls)), screen time on weekdays, study specialisation, age in half-years, regularity of eating breakfast and device wear time. In Model 3 adjusted also for minutes spent in Moderate-to-vigorous physical activity (CPM  $\geq$  1952).

Appendix Table 3. Association between minutes per day spent in MVPA (CPM  $\geq$  1952) at baseline and changes in body composition, adjusted for puberty<sup>#</sup>.

|                              | Boys (n = 143) |             |         | Girls (n = 256) |             |         |
|------------------------------|----------------|-------------|---------|-----------------|-------------|---------|
|                              | Beta           | 95% CI      | p value | Beta            | 95% CI      | p value |
| $\Delta$ BMI                 |                |             |         |                 |             |         |
| Model 1                      | 0.11           | -0.08, 0.31 | 0.24    | -0.01           | -0.17, 0.16 | 0.95    |
| Model 2                      | 0.06           | -0.15, 0.28 | 0.55    | 0.07            | -0.12, 0.25 | 0.48    |
| $\Delta$ waist circumference |                |             |         |                 |             |         |
| Model 1                      | 0.28           | -0.38, 0.95 | 0.40    | -0.03           | -0.69, 0.63 | 0.94    |
| Model 2                      | -0.03          | -0.77, 0.72 | 0.95    | -0.00           | -0.72, 0.72 | 0.99    |
| $\Delta$ FMI                 |                |             |         |                 |             |         |
| Model 1                      | 0.02           | -0.16, 0.20 | 0.80    | -0.01           | -0.17, 0.14 | 0.86    |
| Model 2                      | 0.04           | -0.16, 0.24 | 0.68    | 0.05            | -0.12, 0.22 | 0.55    |
| $\Delta$ LMI                 |                |             |         |                 |             |         |
| Model 1                      | 0.08           | -0.02, 0.17 | 0.11    | 0.03            | -0.03, 0.09 | 0.35    |
| Model 2                      | 0.01           | -0.09, 0.11 | 0.81    | 0.02            | -0.04, 0.09 | 0.49    |
| $\Delta$ aLMI                |                |             |         |                 |             |         |
| Model 1                      | 0.05           | -0.01, 0.10 | 0.09    | 0.02            | -0.01, 0.05 | 0.14    |
| Model 2                      | 0.02           | -0.04, 0.07 | 0.60    | 0.02            | -0.01, 0.05 | 0.20    |

1  
2  
3 #: The table displays the association between minutes spent in moderate-to-vigorous physical activity  
4 (MVPA) and difference in BMI (kg/m<sup>2</sup>), waist circumference, FMI (fat mass in kg/m<sup>2</sup>), LMI (lean mass  
5 in kg/m<sup>2</sup>) and aLMI (appendicular lean mass in kg/m<sup>2</sup>) between Fit Futures 1 (2010-2011) and Fit  
6 Futures 2 (2012-2013). The models give the beta coefficient for 15 minutes increase in MVPA. Both  
7 models were adjusted for baseline values of the outcome. In model 2 also adjusted for time between  
8 measurements and baseline values of pubertal development (pds (boys) and age at menarche (girls)),  
9 screen time on weekdays, study specialisation, age in half-years, regularity of eating breakfast and  
10 device wear time.  
11  
12  
13  
14  
15  
16  
17  
18  
19  
20  
21  
22  
23  
24  
25  
26  
27  
28  
29  
30  
31  
32  
33  
34  
35  
36  
37  
38  
39  
40  
41  
42  
43  
44  
45  
46  
47  
48  
49  
50  
51  
52  
53  
54  
55  
56  
57  
58  
59  
60



**STROBE** statement for submitted manuscript entitled “*The association between objectively measured physical activity and longitudinal changes in body composition in adolescents; The Tromsø Study Fit Futures Cohort.*”

|                           | <b>Item No</b> | <b>Recommendation</b>                                                                                                     |
|---------------------------|----------------|---------------------------------------------------------------------------------------------------------------------------|
| <b>Title and abstract</b> | 1              | (a) P. 1, lines 1-2.<br>(b) P. 3, lines 1-23                                                                              |
| <b>Introduction</b>       |                |                                                                                                                           |
| Background/rationale      | 2              | P. 5, lines 1-25 and P. 6, lines 1-3.                                                                                     |
| Objectives                | 3              | P. 6, lines 3-8.                                                                                                          |
| <b>Methods</b>            |                |                                                                                                                           |
| Study design              | 4              | P. 6, lines 11-12.                                                                                                        |
| Setting                   | 5              | P. 6, lines 12-17 and P. 6, lines 22-23.                                                                                  |
| Participants              | 6              | (a) P. 6, lines 18-21.                                                                                                    |
| Variables                 | 7              | P. 8, lines 7-10, lines 15-25. P. 9, lines 1-14.                                                                          |
| Data sources/ measurement | 8*             | P. 6, lines 22-24. P. 7, lines 3-25. P. 8, lines 1-11.                                                                    |
| Bias                      | 9              | P. 9, lines 10-14.                                                                                                        |
| Study size                | 10             | P. 6, lines 17-21.                                                                                                        |
| Quantitative variables    | 11             | P. 9, lines 1-3.                                                                                                          |
| Statistical methods       | 12             | (a) P. 8, lines 14-25 and P. 9, lines 1-16.<br>(b) P. 9, lines 10-15.<br>(c) P. 6, lines 17-21.<br>(e) P. 17, lines 22-25 |
| <b>Results</b>            |                |                                                                                                                           |
| Participants              | 13*            | (a) P. 6, lines 12-21.<br>(b) See (a).                                                                                    |
| Descriptive data          | 14*            | (a) See Table 1.<br>(b) See 13a<br>(c) See Table 1.                                                                       |
| Outcome data              | 15*            | See Table 1.                                                                                                              |
| Main results              | 16             | (a) See Tables and P. 9, lines 4-15.<br>(b) See Table 1.                                                                  |
| Other analyses            | 17             | P. 9, lines 11-15, and P. 16, lines 19-22. P. 17, lines 22-25.                                                            |
| <b>Discussion</b>         |                |                                                                                                                           |
| Key results               | 18             | P. 14, lines 4-10.                                                                                                        |
| Limitations               | 19             | P. 15, lines 20-24. P. 17, lines 2-8 and 11-25. P. 18, lines 1-3.                                                         |
| Interpretation            | 20             | P. 14, lines 11 – 24. P. 15, 1-24. P. 16, lines 1-25. P. 17, lines 1-8.                                                   |
| Generalisability          | 21             |                                                                                                                           |
| <b>Other information</b>  |                |                                                                                                                           |
| Funding                   | 22             | P. 19, lines 15-19.                                                                                                       |

# BMJ Open

## The association between objectively measured physical activity and longitudinal changes in body composition in adolescents; The Tromsø Study Fit Futures Cohort.

|                                 |                                                                                                                                                                                                                                                                                                                                                                                                                                                                                                                                                                                                                                                                                                                                                                                                                                                                                                                                                                                            |
|---------------------------------|--------------------------------------------------------------------------------------------------------------------------------------------------------------------------------------------------------------------------------------------------------------------------------------------------------------------------------------------------------------------------------------------------------------------------------------------------------------------------------------------------------------------------------------------------------------------------------------------------------------------------------------------------------------------------------------------------------------------------------------------------------------------------------------------------------------------------------------------------------------------------------------------------------------------------------------------------------------------------------------------|
| Journal:                        | <i>BMJ Open</i>                                                                                                                                                                                                                                                                                                                                                                                                                                                                                                                                                                                                                                                                                                                                                                                                                                                                                                                                                                            |
| Manuscript ID                   | bmjopen-2020-036991.R1                                                                                                                                                                                                                                                                                                                                                                                                                                                                                                                                                                                                                                                                                                                                                                                                                                                                                                                                                                     |
| Article Type:                   | Original research                                                                                                                                                                                                                                                                                                                                                                                                                                                                                                                                                                                                                                                                                                                                                                                                                                                                                                                                                                          |
| Date Submitted by the Author:   | 29-Apr-2020                                                                                                                                                                                                                                                                                                                                                                                                                                                                                                                                                                                                                                                                                                                                                                                                                                                                                                                                                                                |
| Complete List of Authors:       | Aars, Nils; UiT – The Arctic University of Norway, Department of Community Medicine; Nordlandssykehuset HF<br>Beldo, Sigurd; UiT Arctic University of Norway, School of Sport Sciences<br>Jacobsen, Bjarne; UiT – The Arctic University of Norway, Department of Community Medicine; UiT – The Arctic University of Norway, Centre for Sami Health Research<br>Horsch, Alexander; UiT – The Arctic University of Norway, Department of Computer Science<br>Morseth, Bente; UiT Arctic University of Norway, School of Sport Sciences; UiT – The Arctic University of Norway, Department of Community Medicine<br>Emaus, Nina; UiT The Arctic University of Norway, Department of Health and Care Sciences<br>Furberg, Anne-Sofie; UiT The Arctic University of Norway, Department of Community Medicine; Universitetssykehuset Nord-Norge, Department of Microbiology and Infection Control<br>Grimsgaard, Sameline; UiT The Arctic University of Norway, Department of Community Medicine |
| <b>Primary Subject Heading</b>: | Public health                                                                                                                                                                                                                                                                                                                                                                                                                                                                                                                                                                                                                                                                                                                                                                                                                                                                                                                                                                              |
| Secondary Subject Heading:      | Sports and exercise medicine, Epidemiology                                                                                                                                                                                                                                                                                                                                                                                                                                                                                                                                                                                                                                                                                                                                                                                                                                                                                                                                                 |
| Keywords:                       | EPIDEMIOLOGY, PUBLIC HEALTH, SPORTS MEDICINE                                                                                                                                                                                                                                                                                                                                                                                                                                                                                                                                                                                                                                                                                                                                                                                                                                                                                                                                               |
|                                 |                                                                                                                                                                                                                                                                                                                                                                                                                                                                                                                                                                                                                                                                                                                                                                                                                                                                                                                                                                                            |

SCHOLARONE™  
Manuscripts



I, the Submitting Author has the right to grant and does grant on behalf of all authors of the Work (as defined in the below author licence), an exclusive licence and/or a non-exclusive licence for contributions from authors who are: i) UK Crown employees; ii) where BMJ has agreed a CC-BY licence shall apply, and/or iii) in accordance with the terms applicable for US Federal Government officers or employees acting as part of their official duties; on a worldwide, perpetual, irrevocable, royalty-free basis to BMJ Publishing Group Ltd ("BMJ") its licensees and where the relevant Journal is co-owned by BMJ to the co-owners of the Journal, to publish the Work in this journal and any other BMJ products and to exploit all rights, as set out in our [licence](#).

The Submitting Author accepts and understands that any supply made under these terms is made by BMJ to the Submitting Author unless you are acting as an employee on behalf of your employer or a postgraduate student of an affiliated institution which is paying any applicable article publishing charge ("APC") for Open Access articles. Where the Submitting Author wishes to make the Work available on an Open Access basis (and intends to pay the relevant APC), the terms of reuse of such Open Access shall be governed by a Creative Commons licence – details of these licences and which [Creative Commons](#) licence will apply to this Work are set out in our licence referred to above.

Other than as permitted in any relevant BMJ Author's Self Archiving Policies, I confirm this Work has not been accepted for publication elsewhere, is not being considered for publication elsewhere and does not duplicate material already published. I confirm all authors consent to publication of this Work and authorise the granting of this licence.

1  
2  
3  
4 1 **The association between objectively measured physical activity and longitudinal**  
5  
6  
7 2 **changes in body composition in adolescents; The Tromsø Study Fit Futures Cohort.**  
8  
9

10  
11 3 Nils Abel Aars<sup>1, 2\*</sup>  
12

13  
14  
15 4 Sigurd Beldo<sup>3</sup>  
16

17  
18  
19 5 Bjarne K Jacobsen<sup>1, 4</sup>  
20  
21

22  
23 6 Alexander Horsch<sup>5</sup>  
24  
25

26  
27 7 Bente Morseth<sup>3, 1</sup>  
28  
29

30  
31 8 Nina Emaus<sup>6</sup>  
32  
33

34  
35 9 Anne-Sofie Furberg<sup>1, 7</sup>  
36  
37

38  
39 10 Sameline Grimsgaard<sup>1</sup>  
40  
41

42  
43  
44 11  
45  
46

47  
48 12 **Affiliations**  
49

50  
51  
52 13 1. Department of Community Medicine, UiT the Arctic University of Norway, Tromsø,  
53  
54

55  
56 14 Norway  
57  
58  
59  
60

- 1  
2  
3  
4 1 2. Nordland Hospital, Bodø, Norway.  
5  
6  
7  
8 2 3. School of Sport Sciences, UiT the Arctic University of Norway, Alta, Norway  
9  
10  
11  
12 3 4. Centre for Sami Health Research, Department of Community Medicine, UiT the  
13  
14  
15 4 Arctic University of Norway, Tromsø, Norway  
16  
17  
18  
19 5 5. Department of Computer Science, UiT the Arctic University of Norway, Tromsø,  
20  
21  
22 6 Norway  
23  
24  
25  
26  
27 7 6. Department of Health and Care Sciences, UiT the Arctic University of Norway,  
28  
29  
30 8 Tromsø, Norway  
31  
32  
33  
34 9 7. Department of Microbiology and Infection Control, University Hospital of North  
35  
36  
37 10 Norway, Tromsø, Norway  
38  
39  
40  
41  
42 11 \* Corresponding author. Correspondence to [nils.a.aars@uit.no](mailto:nils.a.aars@uit.no)  
43  
44  
45  
46 12 Nils Abel Aars  
47  
48  
49  
50 13 Department of Community Medicine  
51  
52  
53  
54 14 UiT the Arctic University of Norway  
55  
56  
57  
58 15 9037 Tromsø, Norway.  
59  
60

1  
2  
3  
4  
5  
6  
7  
8  
9  
10  
11  
12  
13  
14  
15  
16  
17  
18  
19  
20  
21  
22  
23  
24  
25  
26  
27  
28  
29  
30  
31  
32  
33  
34  
35  
36  
37  
38  
39  
40  
41  
42  
43  
44  
45  
46  
47  
48  
49  
50  
51  
52  
53  
54  
55  
56  
57  
58  
59  
60

1

2

For peer review only

1  
2  
3  
4 1 **Abstract**

5  
6  
7 2 **Objectives:** Physical activity may play an important role in deterring the world-wide  
8  
9  
10  
11 3 obesity epidemic. This study aimed to determine if objectively measured physical  
12  
13  
14 4 activity in first year of upper secondary high school predicted changes in body  
15  
16  
17  
18 5 composition over two years of follow up in a cohort of Norwegian adolescents (n  
19  
20  
21 6 =431).

22  
23  
24  
25 7 **Design:** A longitudinal study of adolescents (60.3% girls, mean age 16 (SD 0.4) at  
26  
27  
28  
29 8 baseline) participating in the Fit Futures studies 1 (2010-11) and 2 (2012-13).

30  
31  
32  
33 9 **Setting:** All eight upper secondary high schools in neighbouring municipalities of  
34  
35  
36  
37 10 Tromsø and Balsfjord, Northern Norway.

38  
39  
40  
41 11 **Participants:** Students participating in both studies and under the age of 18 at  
42  
43  
44 12 baseline, and with valid measurement of physical activity at baseline and body  
45  
46  
47  
48 13 composition at both time points.

49  
50  
51  
52 14 **Primary- and secondary outcomes:** Change in objectively measured body mass index  
53  
54  
55 15 and waist circumference, and change in dual-energy x-ray absorptiometry measured  
56  
57  
58  
59 16 fat mass index, lean mass index and appendicular lean mass index between baseline  
60

1 and follow-up. Differences in physical activity at baseline between sexes was also  
2 compared.

3 **Results:** At baseline, boys had significantly higher physical activity volume ( $p=0.01$ )  
4 and spent on average 6.4 (95% CI: 2.1, 10.6) more minutes in moderate-to-vigorous  
5 physical activity (MVPA) than girls ( $p < 0.01$ ). In multivariate regression analyses  
6 there was no significant association between either measure of baseline physical  
7 activity and changes in body composition parameters in boys. In girls there was a  
8 significant association between sedentary- and light activity and changes in lean  
9 mass index ( $p < 0.01$ ) and appendicular lean mass index ( $p = 0.05$ ).

10 **Conclusions:** In this cohort of Norwegian adolescents, sedentary and light physical  
11 activity were associated with changes in indices of lean mass in girls, but not boys.  
12 Minutes spent in moderate-to-vigorous physical activity was not associated with  
13 changes in either measure of body composition in either sex.

#### 14 **Strengths and limitations of this study**

- 15 • This study used objective measures of physical activity.



- 1  
2  
3  
4 1 • The study included objectively measured weight, height and waist  
5  
6  
7 2 circumference, and dual-energy x-ray absorptiometry (DXA) measures of fat-  
8  
9  
10 3 and lean mass.  
11  
12  
13  
14 4 • We were not able to fully adjust for nutrition and not for pubertal development.  
15  
16  
17 5 • The 431 participants with complete data from both baseline and follow-up  
18  
19  
20 6 represents 41% of those attending Fit Futures 1, indicating a degree of  
21  
22  
23  
24 7 selection.  
25  
26  
27  
28 8  
29  
30  
31  
32 9  
33  
34  
35  
36  
37  
38  
39  
40  
41  
42  
43  
44  
45  
46  
47  
48  
49  
50  
51  
52  
53  
54  
55  
56  
57  
58  
59  
60

## 1 Background

2 The potential of physical activity to prevent or treat a number of diseases has been  
3 highlighted by the World Health Organization,[1] with inactivity accounting for 9% of  
4 worldwide premature mortality.[2] Public health guidelines state that adolescents  
5 should engage in Moderate-to-Vigorous Physical Activity (MVPA)  $\geq$  60 minutes per  
6 day,[3] but in 2011, only 50% of Norwegian 15 year olds met these  
7 recommendations.[4] During adolescence there is a decline in both total physical  
8 activity and MVPA,[5, 6] and many quit or reduce participation in organized sports.[7]  
9 As of 2013, the prevalence of overweight and obesity (Body Mass Index (BMI)  $\geq$  25  
10 kg/m<sup>2</sup>) in Norwegians aged <20 years appear to be stabilizing at around 20% in boys  
11 and 16% in girls - comparable to the Nordic countries.[8] This is lower than in the  
12 United States (around 29% in boys and girls) [8], but the health effects for those  
13 concerned may still be substantial over the long term.[9]  
14 While physical activity has many positive health effects, its relationship with adiposity  
15 is less clear and it has proven difficult to determine causality, direction and magnitude  
16 of this relationship.[10] Cross-sectional research typically shows a strong inverse

1  
2  
3  
4 1 association between physical activity and weight status,[11] but temporality cannot be  
5  
6  
7 2 ascertained using such study designs.[12] Longitudinal studies may ascertain if lower  
8  
9  
10 3 physical activity precedes excess weight gain, but a review found no evidence for a  
11  
12  
13  
14 4 relationship between objectively measured physical activity and body fat gain in  
15  
16  
17 5 adolescents.[12] The lack of congruent results may in part be explained by the  
18  
19  
20  
21 6 diverse and inadequate measures of both exposure and outcome used in research of  
22  
23  
24 7 the association between physical activity and body composition.[10, 11]  
25  
26  
27  
28 8 Although many methods to measure physical activity are available, the most common  
29  
30  
31  
32 9 and most feasible is self-report which commonly overestimates the total amount of  
33  
34  
35  
36 10 physical activity.[13] Body composition is most commonly assessed using BMI, but  
37  
38  
39 11 BMI does not distinguish between fat- and muscle mass.[14] This has the potential to  
40  
41  
42  
43 12 cause misclassification of overweight status and may attenuate a true association  
44  
45  
46 13 between physical activity and fat or muscle mass. Thus, in the current study, we  
47  
48  
49  
50 14 sought to overcome these limitations by applying objective measures of both physical  
51  
52  
53 15 activity and specific measures of body composition. Our aim was to investigate the  
54  
55  
56  
57 16 association between objectively measured physical activity and changes in five  
58  
59  
60 17 different measures of body composition (body mass index, waist circumference, fat

1  
2  
3  
4 1 mass index, lean mass index and appendicular lean mass index) over two years of  
5  
6  
7 2 follow-up in a cohort of Norwegian adolescents.  
8  
9  
10  
11  
12  
13  
14

#### 15 4 **Methods and materials**

16  
17  
18  
19 5 We used data from the first and second Fit Futures cohort studies, performed in  
20  
21  
22  
23 6 2010-2011 and 2012-2013, respectively. The first study invited all students (n=1,117)  
24  
25  
26 7 in their first year of upper secondary high school in the neighbouring municipalities of  
27  
28  
29  
30 8 Tromsø and Balsfjord in Northern Norway, and had a participation of 93%. The study  
31  
32  
33  
34 9 was repeated two years later, when the students were in their last year of upper  
35  
36  
37 10 secondary high school or had started as apprentices if they studied vocational  
38  
39  
40  
41 11 subjects. The second study included 868 participants, giving an attendance of 77%.  
42  
43  
44 12 All eight upper secondary high schools in the two municipalities participated in both  
45  
46  
47 13 studies. Altogether 735 adolescents attended both surveys. For the present study we  
48  
49  
50  
51 14 excluded those aged  $\geq 18$  years of age at baseline (n = 38). Some participants (n =  
52  
53  
54 15 240) did not have valid measurements of physical activity at baseline, and were  
55  
56  
57  
58 16 therefore not included in the study. We also excluded those with missing data on  
59  
60

1  
2  
3  
4 1 change in body composition parameters or variables included in the model (n = 26).  
5  
6  
7 2 Thus, 431 participants were included in the present study (60.3% girls).  
8  
9  
10  
11 3 Students were granted leave of absence from school to attend an examination at the  
12  
13  
14 4 Clinical Research Unit at the University Hospital of Northern Norway in both surveys.  
15  
16  
17  
18 5 The participants attended a clinical examination where they also completed a  
19  
20  
21 6 questionnaire, which included questions on lifestyle, screen time, dietary habits etc.  
22  
23  
24  
25 7 The participants signed a letter of informed consent, and those under the age of 16  
26  
27  
28 8 brought a letter of consent signed by their parent or guardian.  
29  
30  
31  
32  
33 9 All measurements were performed by trained personnel. Height was measured to the  
34  
35  
36 10 nearest centimeter and weight to the nearest 100 gram, wearing light clothing and  
37  
38  
39  
40 11 using an automatic electronic scale/stadiometer (Jenix DS 102 stadiometer, Dong  
41  
42  
43 12 Sahn Jenix, Seoul, Korea). Body mass index was calculated as body weight in  
44  
45  
46 13 kilograms/height in meters<sup>2</sup>. Waist circumference was measured to the nearest 0.1  
47  
48  
49  
50 14 centimeter at the height of the umbilicus. Fat and soft tissue lean mass in grams was  
51  
52  
53  
54 15 estimated by whole-body dual energy X-ray absorptiometry (DXA) (GE Lunar  
55  
56  
57 16 Prodigy, Lunar Corporation, Madison, WI, USA). Fat mass comprises all fat, while  
58  
59  
60

1  
2  
3  
4 1 soft tissue lean mass comprises all bodily tissue except fat and skeletal mass. These  
5  
6  
7 2 variables were used to calculate fat mass index (FMI, fat mass in kilograms/height in  
8  
9  
10 3 meters<sup>2</sup>) and lean mass index (LMI, lean mass in kilograms/height in meters<sup>2</sup>). In  
11  
12  
13  
14 4 addition we calculated appendicular lean mass index (aLMI), which is the sum of soft  
15  
16  
17 5 tissue lean mass in kilograms in all four extremities divided by height in meters<sup>2</sup>.  
18  
19  
20  
21 6 Although most commonly used in studies of sarcopenia in elderly,[15] this variable is  
22  
23  
24 7 arguably more specific to skeletal muscle mass than total lean mass index. The  
25  
26  
27 8 ability of DXA to detect changes in appendicular lean mass in young adolescents is  
28  
29  
30  
31 9 good, and has been validated against Magnetic Resonance Imaging (MRI).[16]  
32  
33  
34  
35 10 Physical activity was objectively measured using the ActiGraph GT3X accelerometer  
36  
37  
38  
39 11 (ActiGraph, LLC, Pensacola, USA). Participants were instructed to wear the device  
40  
41  
42 12 on their right hip for seven consecutive days, and to remove it only when showering,  
43  
44  
45  
46 13 swimming or sleeping. The ActiLife software was used to initialize the accelerometer  
47  
48  
49  
50 14 and download data, which was imported into the Quality Control & Analysis Tool  
51  
52  
53 15 (QCAT) for data processing. This software was developed by the research group of  
54  
55  
56 16 professor Horsch in Matlab (The MathWorks, Inc., Massachusetts, USA) for  
57  
58  
59  
60 17 processing of accelerometer data. The accelerometer was set in raw data mode, with

1 a sampling frequency of 30 Hertz and with normal filtering epochs of 10 seconds.

2 Data collection was initiated at 14:00 hours the first day, and concluded at 23:58 on

3 the 8<sup>th</sup> day of measurement. We excluded data from the first day of measurement to

4 reduce reactivity bias. The criteria for a valid measurement of physical activity was

5 wear time of  $\geq$  four consecutive days, with  $\geq$  ten hours wear time per day. This has

6 been demonstrated as representative of activity over a full week.[17] The triaxial

7 algorithm developed by Hecht et al. was used to calculate wear time.[18] Minutes per

8 day in sedentary (0 – 99 CPM), light (100 – 1951 CPM), moderate (1952 – 5723

9 CPM) and vigorous ( $\geq$  5724 CPM) physical activity was determined using the cut-offs

10 developed by Freedson.[19] The choice of these cut-offs enables direct comparisons

11 as the cohort ages, and although these cut-offs are not commonly used for

12 adolescents, we consider the bodily proportions of an adolescent to resemble that of

13 an adult in terms of measured acceleration. The device collected data in both

14 uniaxial- and triaxial mode, but in the present study only the uniaxial data had been

15 processed and therefore available. Studies have shown that uniaxial data recorded

16 from the GT3X correlate well with uniaxial data recorded from previous ActiGraph

1  
2  
3  
4 1 models.[20] Data on objectively measured physical activity was only available from  
5  
6  
7 2 Fit Futures 1.  
8  
9  
10  
11 3 Baseline characteristics were presented as means with standard deviation (SD) or  
12  
13  
14 4 prevalence in percentages with number of subjects (n) (Table 1). Sex-specific  
15  
16  
17  
18 5 difference in body composition between baseline and follow-up was tested using a  
19  
20  
21 6 paired samples t-test. The difference in physical activity between sexes was tested  
22  
23  
24  
25 7 using a two-sample t-test, while sex differences in categories of minutes spent in  
26  
27  
28 8 MVPA was tested using a chi-square test. Difference in linear trend across categories  
29  
30  
31 9 of minutes spent in MVPA was tested using STATA's non-parametric test for trend,  
32  
33  
34  
35 10 developed by Cuzick.[21] Linear regression was used to determine the effect of  
36  
37  
38  
39 11 baseline physical activity on change in body composition, i.e., the change in BMI,  
40  
41  
42 12 waist circumference, FMI, LMI and aLMI from the first to the second Fit Futures  
43  
44  
45  
46 13 Study.

47  
48  
49  
50 14 We used three different predictors of change in body composition, performing three  
51  
52  
53 15 sets of analyses, with first; minutes per day spent in sedentary activity (Table 2)  
54  
55  
56  
57 16 second; minutes per day spent in light activity (Table 3) and third; minutes per day  
58  
59  
60



1  
2  
3 1 spent in MVPA (Table 4). We divided the continuous variables sedentary- and light  
4  
5  
6  
7 2 activity by 30 and the continuous variable MVPA by 15 before inclusion in the  
8  
9  
10 3 models, thus presenting the beta coefficient for change in body composition  
11  
12  
13  
14 4 parameter per 30 minutes of sedentary- or light activity, or per 15 minutes of MVPA,  
15  
16  
17 5 with 95% confidence intervals and a p-value. In model 1 we adjusted for the baseline  
18  
19  
20 6 measurement of the body composition parameter. In the adjusted models (models 2)  
21  
22  
23  
24 7 we also included time between measurements (mean (SD): 730 (74) days) and  
25  
26  
27  
28 8 baseline values of device wear time, age in half years and questionnaire data on  
29  
30  
31 9 screen time on weekdays (how many hours per weekday the students spent in front  
32  
33  
34  
35 10 of a computer or television - answers ranged from none to more than ten hours per  
36  
37  
38  
39 11 weekday) and regularity of eating breakfast as an indicator of healthy meal patterns  
40  
41  
42 12 (answers ranging from rarely/never to every day). In the analyses of sedentary- and  
43  
44  
45 13 light activity we also adjusted for minutes spent in MVPA (models 3). In a subset of  
46  
47  
48  
49 14 analyses (Appendix tables 1 and 2) we repeated the analyses performed in Table 2  
50  
51  
52 15 and 3, adjusting also for self-reported pubertal status measured by either pubertal  
53  
54  
55  
56 16 development scale (boys) or age at menarche (girls). These analyses included the  
57  
58  
59  
60

1  
2  
3  
4 1 143 boys and 256 girls with valid data on pubertal status. In all the analyses, a p-  
5  
6  
7 2 value of  $< 0.05$  was considered statistically significant.  
8  
9

10  
11 3 All analyses were performed sex-specific as decided a-priori, using STATA version  
12  
13  
14 4 14 (StataCorp. 2015. *Stata Statistical Software: Release 14*. College Station, TX:  
15  
16  
17  
18 5 StataCorp LP.).  
19  
20

## 21 22 6 **Patient and public involvement**

23  
24  
25  
26 7 Participating schools were consulted and included in the design phase of the study.  
27  
28  
29

## 30 31 8 **Results**

32  
33  
34 9 Table 1 displays the participants' body composition measurements at baseline and  
35  
36  
37  
38 10 follow-up, as well as physical activity measurements at baseline. Boys had a  
39  
40  
41  
42 11 statistically significant increase in all measures of body composition. Girls had a  
43  
44  
45 12 statistically significant increase in body weight, BMI, fat mass in kg and FMI, but not  
46  
47  
48  
49 13 in LMI and appendicular lean mass. Boys were statistically significantly more  
50  
51  
52 14 physically active than girls in some aspects, with higher mean counts per minute  
53  
54  
55 15 ( $p=0.01$ ) and more minutes in MVPA ( $p<0.01$ ). Time spent in sedentary- or light  
56  
57  
58  
59 16 intensities did not differ significantly between sexes. Twenty-seven percent of boys  
60

1 and 17% of girls complied with the recommendations of 60 minutes per day

2 Moderate-to-Vigorous Physical Activity (MVPA).

3

4

5

6

7

8

9

Table 1. Characteristics of the longitudinal cohort of the Tromsø Study; Fit Futures 2010-11 and 2012-13 <sup>◇</sup>.

|                                          | Boys (n = 171) |              | Girls (n = 260) |              |
|------------------------------------------|----------------|--------------|-----------------|--------------|
|                                          | FF1            | FF2          | FF1             | FF2          |
| Age (years)                              | 16.0 (0.4)     | 18.2 (0.4)   | 16.1 (0.4)      | 18.1 (0.4)   |
| Height (cm)                              | 177.1 (6.6)    | 179.0 (6.5)* | 165.4 (6.6)     | 166.1 (6.6)* |
| Body weight (kg)                         | 69.0 (12.3)    | 74.3 (13.0)* | 60.8 (10.8)     | 63.4 (11.6)* |
| Body mass index (BMI kg/m <sup>2</sup> ) | 22.0 (3.5)     | 23.2 (3.7)*  | 22.2 (3.7)      | 23.0 (4.0)*  |
| Waist circumference (cm)                 | 81.0 (10.3)    | 83.9 (10.9)* | 76.7 (9.8)      | 78.0 (10.8)* |
| Total Body Fat Mass (kg)                 | 13.3 (9.4)     | 15.6 (10.4)* | 19.9 (8.3)      | 21.7 (9.1)*  |
| Fat Mass Index (FMI kg/m <sup>2</sup> )  | 4.2 (3.0)      | 4.9 (3.2)*   | 7.3 (3.0)       | 7.9 (3.3)*   |
| Total Body Lean Mass (kg)                | 54.0 (6.5)     | 56.4 (6.9)*  | 38.9 (4.5)      | 39.3 (4.7)*  |

|                                                        |                  |             |                            |            |
|--------------------------------------------------------|------------------|-------------|----------------------------|------------|
| Lean Mass Index (LMI kg/m <sup>2</sup> )               | 17.2 (1.6)       | 17.6 (1.8)* | 14.2 (1.3)                 | 14.2 (1.4) |
| Appendicular Lean Mass (kg)                            | 25.3 (3.4)       | 26.2 (3.6)* | 17.4 (2.3)                 | 17.4 (2.3) |
| Appendicular Lean Mass Index (aLMI kg/m <sup>2</sup> ) | 8.1 (0.9)        | 8.2 (0.9)*  | 6.4 (0.7)                  | 6.3 (0.7)* |
| Accelerometer variables                                |                  |             |                            |            |
| Wear time per valid day                                | 14.2 (1.2)       |             | 14.1 (1.1)                 |            |
| Counts per minute                                      | 362.9<br>(137.5) |             | 334.0 (111.9) <sup>∞</sup> |            |
| Minutes per day in different intensities               |                  |             |                            |            |
| Sedentary (cpm 0 – 99)                                 | 573.3 (77.3)     |             | 565.3 (63.2)               |            |
| Light (cpm 100 – 1951)                                 | 230.5 (58.8)     |             | 236.2 (48.4)               |            |
| Moderate (cpm 1952 – 5723)                             | 45.8 (20.6)      |             | 40.2 (17.7) <sup>∞</sup>   |            |
| Vigorous (cpm ≥ 5724)                                  | 3.7 (5.8)        |             | 2.9 (4.1) <sup>∞</sup>     |            |
| MVPA <sup>#</sup> (cpm ≥ 1952)                         | 49.5 (23.4)      |             | 43.1 (19.6) <sup>∞</sup>   |            |
| Meeting MVPA guidelines per day                        |                  |             |                            |            |
| 0 – 29 minutes                                         | 35 (20.5)        |             | 69 (26.5)                  |            |
| 30 – 59 minutes                                        | 90 (52.6)        |             | 146 (56.2)                 |            |
| ≥ 60 minutes                                           | 46 (26.9)        |             | 45 (17.3) <sup>§</sup>     |            |

1 ◇: Values are means with standard deviation (SD) or n (prevalence in percentages). BMI: body weight  
 2 in kg/height in meters<sup>2</sup>, FMI: fat mass in kg/height in meters<sup>2</sup>, LMI: lean mass in kg/height in meters<sup>2</sup>,  
 3 aLMI: appendicular lean mass in kg/height in meters<sup>2</sup>. Data on physical activity in FF2 was not  
 4 available.

5 \*: Significantly different from baseline measurement (p < 0.05)

6 ∞: Significantly different from boys (mean).

7 #: MVPA: moderate to vigorous physical activity, using cut-offs suggested by Freedson.[19]

8 §: significantly different linear trend from boys (p<0.05)

9

10 Table 2 displays the association between minutes spent in sedentary activity at  
 11 baseline and changes in body composition between baseline and follow-up. There

1 was no association between sedentary activity and changes in BMI, waist  
 2 circumference and FMI in neither boys nor girls. In girls, but not in boys, there was a  
 3 significant association between minutes spent in sedentary activity at baseline and  
 4 changes in both LMI ( $p < 0.01$ ) and aLMI ( $p = 0.02$ ). Adjustment for covariates and  
 5 MVPA slightly attenuated the association with aLMI ( $p = 0.05$ ).

Table 2. Association between minutes per day spent in sedentary activity (CPM 0 – 99) at baseline and changes in body composition#.

|                              | Boys (n = 171) |             |         | Girls (n = 260) |              |         |
|------------------------------|----------------|-------------|---------|-----------------|--------------|---------|
|                              | Beta           | 95% CI      | p value | Beta            | 95% CI       | p value |
| $\Delta$ BMI                 |                |             |         |                 |              |         |
| Model 1                      | -0.02          | -0.13, 0.09 | 0.76    | -0.05           | -0.15, 0.05  | 0.33    |
| Model 2                      | -0.02          | -0.17, 0.12 | 0.75    | -0.11           | -0.24, 0.03  | 0.12    |
| Model 3                      | 0.01           | -0.17, 0.20 | 0.88    | -0.11           | -0.27, 0.05  | 0.16    |
| $\Delta$ waist circumference |                |             |         |                 |              |         |
| Model 1                      | 0.17           | -0.21, 0.56 | 0.37    | -0.01           | -0.41, 0.40  | 0.96    |
| Model 2                      | 0.27           | -0.24, 0.78 | 0.30    | -0.33           | -0.87, 0.20  | 0.22    |
| Model 3                      | 0.42           | -0.23, 1.07 | 0.20    | -0.44           | -1.06, 0.18  | 0.17    |
| $\Delta$ FMI                 |                |             |         |                 |              |         |
| Model 1                      | 0.00           | -0.10, 0.10 | 0.99    | -0.01           | -0.11, 0.08  | 0.83    |
| Model 2                      | -0.02          | -0.16, 0.11 | 0.74    | -0.06           | -0.18, 0.07  | 0.36    |
| Model 3                      | 0.00           | -0.17, 0.17 | 0.98    | -0.05           | -0.20, 0.09  | 0.48    |
| $\Delta$ LMI                 |                |             |         |                 |              |         |
| Model 1                      | 0.00           | -0.05, 0.05 | 0.88    | -0.06           | -0.09, -0.02 | <0.01   |

|               |      |             |      |       |                  |       |
|---------------|------|-------------|------|-------|------------------|-------|
| Model 2       | 0.01 | -0.06, 0.07 | 0.77 | -0.07 | -0.12, -<br>0.02 | <0.01 |
| Model 3       | 0.02 | -0.06, 0.10 | 0.63 | -0.08 | -0.13, -<br>0.03 | <0.01 |
| $\Delta$ aLMI |      |             |      |       |                  |       |
| Model 1       | 0.00 | -0.03, 0.03 | 0.84 | -0.02 | -0.04, -<br>0.00 | 0.02  |
| Model 2       | 0.00 | -0.03, 0.04 | 0.81 | -0.03 | -0.05, -<br>0.01 | 0.02  |
| Model 3       | 0.01 | -0.04, 0.05 | 0.71 | -0.03 | -0.06, 0.00      | 0.05  |

#: The table displays the association between minutes spent in sedentary activity and difference in BMI (kg/m<sup>2</sup>), waist circumference, FMI (fat mass in kg/m<sup>2</sup>), LMI (lean mass in kg/m<sup>2</sup>) and aLMI (appendicular lean mass in kg/m<sup>2</sup>) between Fit Futures 1 (2010-2011) and Fit Futures 2 (2012-2013). The models give the beta coefficient for 30 minutes increase in sedentary activity. All models were adjusted for baseline values of the body composition parameter. In model 2 also adjusted for time between measurements and baseline values of screen time on weekdays, study specialisation, age in half-years, regularity of eating breakfast and device wear time. In Model 3 adjusted also for minutes spent in Moderate-to-vigorous physical activity (CPM  $\geq$  1952).

Table 3 displays the association between minutes spent in light activity at baseline and changes in body composition between baseline and follow-up. There was no association between the exposure and either body composition parameter in boys. In girls there was some evidence to suggest an association with change in waist circumference ( $p = 0.05$ ), but the association was attenuated after adjustments ( $p = 0.17$ ). Minutes spent in light physical activity was also associated with changes in LMI ( $p < 0.01$  (Models 2 and 3)) and aLMI ( $p = 0.04$  (Model 2) and  $0.05$  (Model 3)).

Table 3. Association between minutes per day spent in light activity (CPM 100 – 1951) at baseline and changes in body composition#.

|                              | Boys (n = 171) |             |         | Girls (n = 260) |             |         |
|------------------------------|----------------|-------------|---------|-----------------|-------------|---------|
|                              | Beta           | 95% CI      | p value | Beta            | 95% CI      | p value |
| $\Delta$ BMI                 |                |             |         |                 |             |         |
| Model 1                      | 0.04           | -0.11, 0.18 | 0.60    | 0.05            | -0.09, 0.19 | 0.47    |
| Model 2                      | 0.01           | -0.17, 0.18 | 0.93    | 0.12            | -0.04, 0.27 | 0.13    |
| Model 3                      | -0.01          | -0.20, 0.17 | 0.88    | 0.11            | -0.05, 0.27 | 0.16    |
| $\Delta$ waist circumference |                |             |         |                 |             |         |
| Model 1                      | -0.11          | -0.62, 0.40 | 0.68    | 0.54            | 0.01, 1.07  | 0.05    |
| Model 2                      | -0.38          | -1.00, 0.23 | 0.22    | 0.43            | -0.19, 1.05 | 0.17    |
| Model 3                      | -0.42          | -1.07, 0.23 | 0.20    | 0.44            | -0.19, 1.06 | 0.17    |
| $\Delta$ FMI                 |                |             |         |                 |             |         |
| Model 1                      | 0.03           | -0.10, 0.16 | 0.67    | 0.02            | -0.10, 0.15 | 0.71    |
| Model 2                      | 0.01           | -0.15, 0.18 | 0.87    | 0.06            | -0.09, 0.20 | 0.43    |
| Model 3                      | -0.00          | -0.17, 0.17 | 0.98    | 0.05            | -0.09, 0.20 | 0.49    |
| $\Delta$ LMI                 |                |             |         |                 |             |         |
| Model 1                      | -0.01          | -0.07, 0.06 | 0.84    | 0.04            | -0.01, 0.09 | 0.08    |
| Model 2                      | -0.02          | -0.09, 0.06 | 0.67    | 0.08            | 0.03, 0.13  | <0.01   |

|  |               |       |             |      |      |             |       |
|--|---------------|-------|-------------|------|------|-------------|-------|
|  | Model 3       | -0.02 | -0.10, 0.06 | 0.63 | 0.08 | 0.03, 0.13  | <0.01 |
|  | $\Delta$ aLMI |       |             |      |      |             |       |
|  | Model 1       | 0.00  | -0.03, 0.04 | 0.87 | 0.02 | -0.01, 0.04 | 0.16  |
|  | Model 2       | -0.01 | -0.05, 0.04 | 0.73 | 0.03 | 0.00, 0.06  | 0.04  |
|  | Model 3       | -0.01 | -0.05, 0.04 | 0.70 | 0.03 | -0.00, 0.06 | 0.05  |

#: The table displays the association between minutes spent in light activity and difference in BMI (kg/m<sup>2</sup>), waist circumference, FMI (fat mass in kg/m<sup>2</sup>), LMI (lean mass in kg/m<sup>2</sup>) and aLMI (appendicular lean mass in kg/m<sup>2</sup>) between Fit Futures 1 (2010-2011) and Fit Futures 2 (2012-2013). The models give the beta coefficient for 30 minutes increase in light activity. All models were adjusted for baseline values of the body composition parameter. In model 2 also adjusted for time between measurements and baseline values of screen time on weekdays, study specialisation, age in half-years, regularity of eating breakfast and device wear time. In Model 3 adjusted also for minutes spent in Moderate-to-vigorous physical activity (CPM  $\geq$  1952).

Table 4 displays the association between minutes in MVPA at baseline and changes in body composition between baseline and follow-up. There was no association between time spent in MVPA and changes in either measure of body composition for either sex.

Table 4. Association between minutes per day spent in MVPA (CPM  $\geq$  1952) at baseline and changes in body composition#.

|  | Boys (n = 171) |        |         | Girls (n = 260) |        |         |
|--|----------------|--------|---------|-----------------|--------|---------|
|  | Beta           | 95% CI | p value | Beta            | 95% CI | p value |
|  |                |        |         |                 |        |         |



|                              |       |             |      |       |             |      |  |
|------------------------------|-------|-------------|------|-------|-------------|------|--|
| $\Delta$ BMI                 |       |             |      |       |             |      |  |
| Model 1                      | 0.11  | -0.07, 0.30 | 0.22 | -0.00 | -0.17, 0.16 | 0.97 |  |
| Model 2                      | 0.08  | -0.13, 0.29 | 0.47 | 0.07  | -0.11, 0.25 | 0.47 |  |
| $\Delta$ waist circumference |       |             |      |       |             |      |  |
| Model 1                      | 0.25  | -0.39, 0.89 | 0.44 | -0.03 | -0.68, 0.63 | 0.94 |  |
| Model 2                      | -0.02 | -0.75, 0.71 | 0.95 | 0.02  | -0.70, 0.74 | 0.96 |  |
| $\Delta$ FMI                 |       |             |      |       |             |      |  |
| Model 1                      | 0.02  | -0.15, 0.19 | 0.83 | -0.01 | -0.17, 0.14 | 0.86 |  |
| Model 2                      | 0.06  | -0.14, 0.25 | 0.57 | 0.05  | -0.12, 0.22 | 0.54 |  |
| $\Delta$ LMI                 |       |             |      |       |             |      |  |
| Model 1                      | 0.07  | -0.02, 0.15 | 0.11 | 0.03  | -0.03, 0.09 | 0.33 |  |
| Model 2                      | 0.01  | -0.08, 0.10 | 0.86 | 0.02  | -0.04, 0.09 | 0.44 |  |
| $\Delta$ aLMI                |       |             |      |       |             |      |  |
| Model 1                      | 0.03  | -0.02, 0.08 | 0.19 | 0.02  | -0.01, 0.05 | 0.13 |  |
| Model 2                      | 0.00  | -0.05, 0.05 | 0.92 | 0.02  | -0.01, 0.05 | 0.18 |  |

#: The table displays the association between minutes spent in moderate-to-vigorous physical activity (MVPA) and difference in BMI ( $\text{kg}/\text{m}^2$ ), waist circumference, FMI (fat mass in  $\text{kg}/\text{m}^2$ ), LMI (lean mass in  $\text{kg}/\text{m}^2$ ) and aLMI (appendicular lean mass in  $\text{kg}/\text{m}^2$ ) between Fit Futures 1 (2010-2011) and Fit Futures 2 (2012-2013). The models give the beta coefficient for 15 minutes increase in MVPA. Both models were adjusted for baseline values of the body composition parameter. In model 2 also adjusted for time between measurements and baseline values of screen time on weekdays, study specialisation, age in half-years, regularity of eating breakfast and device wear time.

1  
2  
3  
4 1  
5  
6  
7  
8 2 In Appendix Tables 1-3, we present sub-analyses restricted to those with complete  
9  
10  
11 3 data on pubertal development, confirming the results displayed in Tables 2-4 also  
12  
13  
14 4 after adjustments for pubertal development. Overall, adjustment for pubertal  
15  
16  
17  
18 5 development had no substantial impact on an association between sedentary, light  
19  
20  
21  
22 6 and moderate-to-vigorous physical activity and changes in body composition for  
23  
24  
25 7 either sex in complete case analyses. However, the association between minutes  
26  
27  
28 8 spent in sedentary activity- and light activity and changes in appendicular lean mass  
29  
30  
31  
32 9 index was no longer significant for girls in Model 3. The point estimates did not differ  
33  
34  
35 10 from those from analyses without adjustments for pubertal development, however.  
36  
37  
38  
39

## 40 **Discussion**

41  
42  
43  
44 12 In this longitudinal population-based study of Norwegian adolescents there were in  
45  
46  
47 13 both boys and girls no associations between objectively measured physical activity at  
48  
49  
50  
51 14 baseline and two-year changes in BMI, waist circumference and FMI. Both boys and  
52  
53  
54 15 girls had statistically significant increases in the measures of body composition  
55  
56  
57  
58 16 (except lean mass index and appendicular lean mass in girls). Objectively measured  
59  
60

1  
2  
3  
4 1 physical activity did not predict changes in boys. In girls there was a weak  
5  
6  
7 2 association between minutes spent in sedentary- and light physical activity and  
8  
9  
10 3 changes in indices of lean mass.  
11  
12  
13  
14 4 Although the magnitude of change differed, both sexes experienced increases in  
15  
16  
17  
18 5 measures of body composition. In boys, FMI increased by 0.7 units, (+ 16.7%),  
19  
20  
21  
22 6 whereas LMI increased by 0.4 units (+ 2.3 %) from baseline. Similar relative changes  
23  
24  
25 7 were observed in girls, (FMI +8.2 %) and (LMI + 0.7%), indicating that FMI increases  
26  
27  
28 8 relatively more than LMI during late adolescence. We observed statistically significant  
29  
30  
31  
32 9 differences in minutes spent in moderate ( $p < 0.01$ ) and vigorous ( $p = 0.04$ ) intensity  
33  
34  
35  
36 10 between boys and girls, but time spent in other intensity levels did not differ.  
37  
38  
39 11 Differences in physical activity by sex is consistent with previous research.[22, 23]  
40  
41  
42 12 Differences in changes in body composition by sex are biologically determined during  
43  
44  
45  
46 13 adolescence, with sex hormones resulting in fat mass accrual in girls and lean mass  
47  
48  
49  
50 14 accrual in boys.[24, 25] The observation that sedentary- and light activity predicted  
51  
52  
53  
54 15 changes in indices of lean mass in girls, but not boys, may be explained by these  
55  
56  
57  
58 16 expected biological differences. Physical activity may have somewhat greater  
59  
60  
61 17 potential to influence lean mass accrual in girls than in boys during this period, as fat-

1  
2  
3  
4 1 free mass is relatively stable in girls in late adolescence whereas it increases up to  
5  
6  
7 2 18 years of age in boys.[26]  
8  
9  
10  
11 3 In the present study sedentary- and light activity had opposing effects on lean mass  
12  
13  
14 4 in girls. In a study using iso-temporal substitution models, positive prospective effects  
15  
16  
17  
18 5 on fat mass was found when substituting 30 minutes of sedentary activity with MVPA,  
19  
20  
21  
22 6 but not when substituted with light activity.[27] We did not use such modelling  
23  
24  
25 7 techniques, but it is reasonable that sedentary- and light physical activity have  
26  
27  
28 8 opposing effects on lean mass.[28] Sedentary- and light activity was correlated ( $r = -$   
29  
30  
31  
32 9 0.39), but minutes spent in different intensity levels are not directly a function of each  
33  
34  
35  
36 10 other as wear time in the participants varies between individuals. Based on wear time  
37  
38  
39 11 inclusion criteria, the theoretical time span for wear time lies between 10 and 24  
40  
41  
42 12 hours. Thus, minutes spent in sedentary activity may not be deduced from the sum of  
43  
44  
45  
46 13 minutes spent in other intensities and vice versa, but it is plausible that higher wear  
47  
48  
49 14 time results in more sedentary time. This was evident in an exploratory analyses on  
50  
51  
52  
53 15 the same cohort (not included in the present study), where higher wear time was  
54  
55  
56 16 significantly associated with more sedentary activity and less light activity ( $p < 0.01$ ).  
57  
58  
59 17 Adjusting for wear time (Models 2) did not change the associations substantially for

1  
2  
3  
4 1 sedentary activity (Table 2), but had some effect on the associations with light  
5  
6  
7 2 physical activity (Table 3). Because of the inverse relationship between minutes  
8  
9  
10 3 spent sedentary and in light activity, it is not possible to determine whether it is  
11  
12  
13  
14 4 sedentary time or light activity-time that is associated with change in LMI. The  
15  
16  
17 5 practical consequences are nevertheless that being active increases lean mass in  
18  
19  
20  
21 6 girls.

22  
23  
24  
25 7 When interpreting results, we must acknowledge the limitations of DXA in the  
26  
27  
28 8 estimation of lean mass, which can be affected by both biological factors and  
29  
30  
31  
32 9 measurement error.[29] Because the relative increase in lean mass was small, only  
33  
34  
35 10 slight differences in for instance individual hydration status at the two time-points may  
36  
37  
38  
39 11 influence estimates and thus the association.

40  
41  
42  
43 12 There was no associations between objectively measured physical activity and  
44  
45  
46 13 change in BMI, waist circumference and FMI for either sex. It may be that the  
47  
48  
49  
50 14 negative effects of less physical activity have not yet had time to manifest themselves  
51  
52  
53 15 in a population still undergoing physiological changes as a result of natural growth,  
54  
55  
56  
57 16 especially considering the relatively short 2-year follow-up. Our results are in line with  
58  
59  
60

1 a systematic review suggesting that objectively measured PA is not an important  
2 predictor of change in adiposity in children, adolescents and adults.[12] In contrast,  
3 another systematic review found a protective effect of physical activity on adiposity in  
4 adolescents.[10] There were however several methodological weaknesses in the  
5 included studies of this review, particularly regarding the validity of the measurement  
6 of both physical activity and body composition. In contrast, our study employed  
7 robust measures of both these exposures- and outcomes, a combination which is  
8 lacking in much past research on the association between the two.[10-12]

9 In adolescents, physical activity is influenced by friends, family and other social  
10 support,[30] and is less stable than in adults.[31-33] Follow-up data on objectively  
11 measured physical activity was not available in the present study, but some evidence  
12 suggests that the decline in physical activity is steeper prior to the onset of  
13 adolescence.[34] Reductions in level of physical activity during the transition from  
14 adolescence to young adulthood nevertheless often occur.[35] Prior observations  
15 from the same cohort showed that change in self-reported physical activity between  
16 baseline and follow-up was a stronger predictor of change in body composition than  
17 self-reported baseline physical activity.[36] Other studies have suggested that

1  
2  
3  
4 1 change in activity during follow-up might obscure an association with body  
5  
6  
7 2 composition.[37, 38] In a sub-analyses, one of four in both the highest and lowest  
8  
9  
10 3 categories of MVPA at baseline reported decreased (high MVPA at baseline) and  
11  
12  
13  
14 4 increased (low MVPA at baseline) self-reported physical activity at follow up, thus  
15  
16  
17 5 indicating that physical activity in adolescents is fluctuant. These two observations,  
18  
19  
20  
21 6 assuming that measurement of both MVPA and self-reported hours per week of  
22  
23  
24 7 physical activity are representative of actual physical activity behaviour at the time,  
25  
26  
27  
28 8 work in opposing directions with regard to the effect of physical activity on changes in  
29  
30  
31 9 adiposity. This phenomenon is known as regression dilution bias and may flatten the  
32  
33  
34  
35 10 regression slope and cause an underestimate of the actual association.[39] With an  
36  
37  
38 11 annual decline in total physical activity of 7% in adolescents, researchers must  
39  
40  
41  
42 12 consider the possibility that measured physical activity has a “best before-date”. It  
43  
44  
45  
46 13 remains questionable whether baseline measurements of a fluctuant behaviour such  
47  
48  
49 14 as physical activity is representative of actual habits during the period of follow-up. It  
50  
51  
52 15 may be that the measurement represents current, but not future (or even prior)  
53  
54  
55  
56 16 habits.[12, 40] This has implications for longitudinal studies of the relationship  
57  
58  
59 17 between physical activity and body composition.[38]  
60

1  
2  
3  
4 1  
5  
6  
78 2 Strengths and limitations  
9

10  
11 3 The primary strength of this study are objective measures of both physical activity  
12  
13  
14  
15 4 and body composition parameters, and the inclusion of tissue-specific measures of  
16  
17  
18  
19 5 body composition. Some limitations have to be considered. As the Fit Futures study  
20  
21  
22 6 did not include a validated food frequency questionnaire or similar instrument for  
23  
24  
25  
26 7 nutritional assessment, we were not able to fully adjust for the potential confounding  
27  
28  
29 8 effects of nutrition and changes in food habits of adolescents on changes in body  
30  
31  
32  
33 9 composition. Accelerometer-measured physical activity has limitations. A hip worn  
34  
35  
36 10 accelerometer such as the ActiGraph GT3X is not able to correctly measure cycling  
37  
38  
39  
40 11 and swimming.[41] Furthermore, accelerometers are dependent on user-compliance,  
41  
42  
43  
44 12 and non-wear time therefore affects the amount of activity which is actually  
45  
46  
47 13 measured. Subjective judgement determines data management and analyses, e.g.  
48  
49  
50 14 the decision to exclude participants with wear time < 10 hours and < 4 consecutive  
51  
52  
53  
54 15 days, is a trade-off between quality of data and the number of participants with valid  
55  
56  
57 16 data. We lacked complete data on physical activity and adjustment variables in 212  
58  
59  
60



1  
2  
3  
4 1 participants, but changes in BMI, waist circumference, FMI, LMI (except in girls,  $p =$   
5  
6  
7 2 0.04) and aLMI were not significantly different between those with- and without  
8  
9  
10 3 complete exposure data. Furthermore, of those with valid data concerning both  
11  
12  
13  
14 4 physical activity and body composition parameters at baseline, close to 25% did not  
15  
16  
17 5 attend the follow up. Although longitudinal observational studies are superior to  
18  
19  
20  
21 6 cross-sectional studies to examine causation, they are also susceptible to directional  
22  
23  
24 7 bias, since participants may avoid physical activity because they are overweight, and  
25  
26  
27  
28 8 not be overweight because they are inactive.[42-44] Finally, as the participants were  
29  
30  
31  
32 9 16 years old, much may already have happened both to the level of physical activity  
33  
34  
35 10 and the different measures of body composition prior to participation. In light of this, 2  
36  
37  
38 11 years of follow-up may be a short time frame to determine the potential effects of  
39  
40  
41  
42 12 physical activity on changes in the different body composition parameters.  
43  
44  
45

46 13  
47  
48  
49

## 50 14 **Conclusion**

51  
52  
53  
54 15 Objectively measured physical activity was not significantly associated with change in  
55  
56  
57  
58 16 objectively measured BMI, waist circumference or FMI after two years in this cohort  
59  
60

1  
2  
3  
4 1 of Norwegian adolescents. There was evidence to suggest that sedentary- and light  
5  
6  
7 2 activity affected indices of lean mass in girls, but not boys.  
8  
9  
10  
11 3  
12  
13  
14  
15 4  
16  
17  
18  
19  
20  
21  
22  
23  
24  
25  
26  
27  
28  
29  
30  
31  
32  
33  
34  
35  
36  
37  
38  
39  
40  
41  
42  
43  
44  
45  
46  
47  
48  
49  
50  
51  
52  
53  
54  
55  
56  
57  
58  
59  
60

For peer review only

## 1 Acknowledgements

2  
3  
4  
5  
6  
7  
8 2 The authors thank the participants in the study, as well as the staff at the Clinical  
9  
10  
11 3 Research Unit at the University Hospital of North Norway for data collection and  
12  
13  
14 4 clinical measurements. We also thank the Fit Futures Steering Committee in both  
15  
16  
17  
18 5 studies.

## 6 Footnotes

### 7 Contributors

8 NAA wrote the draft of the manuscript, which was revised and edited by all authors  
9  
10 several times during the process. SB produced the accelerometer variables in close  
11  
12 collaboration with AH, who wrote the software which converted raw accelerometer  
13  
14 data to variables. BKJ contributed to the statistical analyses, and BM specifically  
15  
16 contributed to the discussion of physical activity. NE and ASF were among the  
17  
18 principal investigators in FF1 and FF2 and contributed significantly to the acquisition  
19  
20 of data. SG formulated the research question and conceived the study. All authors  
21  
22 have substantially contributed to the study, and have read and approved the final  
23  
24 manuscript.

1  
2  
3 1 Funding  
4  
5

6  
7 2 This particular manuscript has not received any specific funding.  
8  
9

10  
11 3 Competing interests  
12  
13

14  
15 4 The authors declare that they have no competing interests.  
16  
17

18  
19 5 Consent for publication  
20  
21

22  
23 6 Not applicable  
24  
25

26  
27 7 Ethics approval  
28  
29

30  
31 8 This study was approved by The Regional Committee of Medical and Health  
32  
33  
34  
35  
36 9 Research Ethics (2014/1666/REK nord).  
37  
38

39  
40 10 Data availability statement  
41  
42

43  
44 11 The data that support the findings of this study are available from UiT – The Arctic  
45  
46  
47 12 University of Norway. Restrictions apply to the availability of these data, which were  
48  
49  
50  
51 13 used under license for the current study, and are thus not publicly available.  
52  
53  
54  
55  
56  
57  
58  
59  
60

## 1 References

1. World Health Organization. Global action plan on physical activity 2018–2030: more active people for a healthier world. Geneva 2018.
2. Lee IM, Shiroma EJ, Lobelo F, et al. Effect of physical inactivity on major non-communicable diseases worldwide: an analysis of burden of disease and life expectancy. *Lancet* 2012;380:219-29.
3. World Health Organization. Global Recommendations on Physical Activity for Health. WHO Guidelines. Geneva 2010.
4. Kolle E SJ, Hansen BH, Anderssen SA. [Fysisk aktivitet blant 6-, 9- og 15-åringer i Norge. Resultater fra en kartlegging i 2011]. The Norwegian Directorate of Health, Oslo, Norway. 2012.
5. Dumith SC, Gigante DP, Domingues MR, et al. Physical activity change during adolescence: a systematic review and a pooled analysis. *Int J Epidemiol.* 2011;40:685-98.
6. Collings PJ, Wijndaele K, Corder K, et al. Magnitude and determinants of change in objectively-measured physical activity, sedentary time and sleep duration from

- 1  
2  
3  
4 1 ages 15 to 17.5y in UK adolescents: the ROOTS study. *Int J Behav Nutr Phys Act.*  
5  
6  
7 2 2015;12:61.  
8  
9  
10 3 7. Crane J, Temple V. A systematic review of dropout from organized sport among  
11  
12  
13 4 children and youth. *Eur Phys Educ Rev.* 2015;21:114-31.  
14  
15  
16  
17 5 8. Ng M, Fleming T, Robinson M, et al. Global, regional, and national prevalence of  
18  
19  
20 6 overweight and obesity in children and adults during 1980-2013: a systematic  
21  
22  
23 7 analysis for the Global Burden of Disease Study 2013. *Lancet.* 2014;384:766-81.  
24  
25  
26  
27 8 9. NCD Risk Factor Collaboration (NCD-RisC). Worldwide trends in body-mass  
28  
29  
30 9 index, underweight, overweight, and obesity from 1975 to 2016: a pooled analysis of  
31  
32  
33 10 2416 population-based measurement studies in 128.9 million children, adolescents,  
34  
35  
36  
37 11 and adults. *Lancet.* 2017. doi:10.1016/S0140-6736(17)32129-3.  
38  
39  
40  
41 12 10. Reichert FF, Baptista Menezes AM, Wells JC, et al. Physical activity as a  
42  
43  
44 13 predictor of adolescent body fatness: a systematic review. *Sports Med.* 2009;39:279-  
45  
46  
47 14 94.  
48  
49  
50  
51  
52 15 11. Jimenez-Pavon D, Kelly J, Reilly JJ. Associations between objectively measured  
53  
54  
55 16 habitual physical activity and adiposity in children and adolescents: Systematic  
56  
57  
58 17 review. *Int J Pediatr Obes.* 2010;5:3-18.  
59  
60

- 1  
2  
3  
4 1 12. Wilks DC, Besson H, Lindroos AK, et al. Objectively measured physical activity  
5  
6  
7 2 and obesity prevention in children, adolescents and adults: a systematic review of  
8  
9  
10 3 prospective studies. *Obes Rev.* 2011;12:e119-29.  
11  
12  
13  
14 4 13. Dyrstad SM, Hansen BH, Holme IM, et al. Comparison of self-reported versus  
15  
16  
17 5 accelerometer-measured physical activity. *Med Sci Sports Exerc.* 2014;46:99-106.  
18  
19  
20  
21 6 14. Aars NA, Jacobsen BK, Furberg AS, et al. Self-reported physical activity during  
22  
23  
24 7 leisure time was favourably associated with body composition in Norwegian  
25  
26  
27 8 adolescents. *Acta Paediatr.* 2018. doi:10.1111/apa.14660.  
28  
29  
30  
31 9 15. Goulding A, Taylor RW, Grant AM, et al. Relationships of appendicular LMI and  
32  
33  
34 10 total body LMI to bone mass and physical activity levels in a birth cohort of New  
35  
36  
37 11 Zealand five-year olds. *Bone.* 2009;45:455-9.  
38  
39  
40  
41  
42 12 16. Bridge P, Pocock NA, Nguyen T, et al. Validation of longitudinal DXA changes in  
43  
44  
45 13 body composition from pre- to mid-adolescence using MRI as reference. *J Clin*  
46  
47  
48 14 *Densitom.* 2011;14:340-7.  
49  
50  
51  
52 15 17. Trost SG, Pate RR, Freedson PS, et al. Using objective physical activity  
53  
54  
55 16 measures with youth: how many days of monitoring are needed? *Med Sci Sports*  
56  
57  
58 17 *Exerc.* 2000;32:426-31.  
59  
60

- 1  
2  
3  
4 1 18. Hecht A, Ma S, Porszasz J, et al. Methodology for using long-term accelerometry  
5  
6  
7 2 monitoring to describe daily activity patterns in COPD. *COPD*. 2009;6:121-9.  
8  
9  
10 3 19. Freedson PS, Melanson E, Sirard J. Calibration of the Computer Science and  
11  
12  
13 4 Applications, Inc. accelerometer. *Med Sci Sports Exerc*. 1998;30:777-81.  
14  
15  
16  
17 5 20. Sasaki JE, John D, Freedson PS. Validation and comparison of ActiGraph activity  
18  
19  
20 6 monitors. *J Sci Med Sport*. 2011;14:411-6.  
21  
22  
23  
24 7 21. Cuzick J. A Wilcoxon-type test for trend. *Stat Med*. 1985;4:87-90.  
25  
26  
27  
28 8 22. Kolle E, Steene-Johannessen J, Andersen LB, et al. Objectively assessed  
29  
30  
31 9 physical activity and aerobic fitness in a population-based sample of Norwegian 9-  
32  
33  
34 10 and 15-year-olds. *Scand J Med Sci Sports*. 2010;20:e41-7.  
35  
36  
37  
38 11 23. Van Hecke L, Loyen A, Verloigne M, et al. Variation in population levels of  
39  
40  
41 12 physical activity in European children and adolescents according to cross-European  
42  
43  
44 13 studies: a systematic literature review within DEDIPAC. *Int J Behav Nutr Phys Act*.  
45  
46  
47 14 2016;13:70.  
48  
49  
50  
51  
52 15 24. Baxter-Jones AD, Eisenmann JC, Mirwald RL, et al. The influence of physical  
53  
54  
55 16 activity on lean mass accrual during adolescence: a longitudinal analysis. *J Appl*  
56  
57  
58 17 *Physiol (1985)*. 2008;105:734-41.  
59  
60



- 1  
2  
3  
4 1 25. Wohlfahrt-Veje C, Tinggaard J, Winther K, et al. Body fat throughout childhood in  
5  
6  
7 2 2647 healthy Danish children: agreement of BMI, waist circumference, skinfolds with  
8  
9  
10 3 dual X-ray absorptiometry. *Eur J Clin Nutr.* 2014;68:664-70.  
11  
12  
13  
14 4 26. Siervogel RM, Demerath EW, Schubert C, et al. Puberty and body composition.  
15  
16  
17 5 *Horm Res.* 2003;60:36-45.  
18  
19  
20  
21 6 27. Sardinha LB, Marques A, Minderico C, et al. Cross-sectional and prospective  
22  
23  
24 7 impact of reallocating sedentary time to physical activity on children's body  
25  
26  
27 8 composition. *Pediatr Obes.* 2017;12:373-9.  
28  
29  
30  
31 9 28. Kenney WL, Wilmore JH, Costill DL. Physiology of sport and exercise. Seventh  
32  
33  
34 10 edition. Champaign, IL: Human Kinetics; 2020.  
35  
36  
37  
38 11 29. Lohman TG, Milliken LA. ACSM's body composition assessment. Champaign, IL:  
39  
40  
41 12 Human Kinetics; 2020.  
42  
43  
44  
45 13 30. Mendonca G, Cheng LA, Melo EN, et al. Physical activity and social support in  
46  
47  
48 14 adolescents: a systematic review. *Health Educ Res.* 2014;29:822-39.  
49  
50  
51  
52 15 31. Telama R, Yang X. Decline of physical activity from youth to young adulthood in  
53  
54  
55 16 Finland. *Med Sci Sports Exerc.* 2000;32:1617-22.  
56  
57  
58  
59  
60

- 1  
2  
3  
4 1 32. Varma VR, Dey D, Leroux A, et al. Re-evaluating the effect of age on physical  
5  
6  
7 2 activity over the lifespan. *Prev Med.* 2017;101:102-8.  
8  
9  
10 3 33. Caspersen CJ, Pereira MA, Curran KM. Changes in physical activity patterns in  
11  
12  
13 4 the United States, by sex and cross-sectional age. *Med Sci Sports Exerc.*  
14  
15  
16  
17 5 2000;32:1601-9.  
18  
19  
20  
21 6 34. Farooq MA, Parkinson KN, Adamson AJ, et al. Timing of the decline in physical  
22  
23  
24 7 activity in childhood and adolescence: Gateshead Millennium Cohort Study. *Br J*  
25  
26  
27 8 *Sports Med.* 2018;52:1002-6..  
28  
29  
30  
31 9 35. Corder K, Winpenny E, Love R, et al. Change in physical activity from  
32  
33  
34 10 adolescence to early adulthood: a systematic review and meta-analysis of  
35  
36  
37 11 longitudinal cohort studies. *Br J Sports Med.* 2019;53:496-503.  
38  
39  
40  
41 12 36. Aars NA, Jacobsen BK, Morseth B, et al. Longitudinal changes in body  
42  
43  
44 13 composition and waist circumference by self-reported levels of physical activity in  
45  
46  
47 14 leisure among adolescents: the Tromsø study, Fit Futures. *BMC Sports Sci Med*  
48  
49  
50 15 *Rehabil.* 2019;11:37.  
51  
52  
53  
54  
55  
56  
57  
58  
59  
60

- 1  
2  
3  
4 1 37. O'Loughlin J, Gray-Donald K, Paradis G, et al. One- and two-year predictors of  
5  
6  
7 2 excess weight gain among elementary schoolchildren in multiethnic, low-income,  
8  
9  
10 3 inner-city neighborhoods. *Am J Epidemiol.* 2000;152:739-46.  
11  
12  
13  
14 4 38. Collings PJ, Wijndaele K, Corder K, et al. Objectively measured physical activity  
15  
16  
17 5 and longitudinal changes in adolescent body fatness: an observational cohort study.  
18  
19  
20  
21 6 *Pediatr Obes.* 2016;11:107-14.  
22  
23  
24 7 39. Hutcheon JA, Chiolerio A, Hanley JA. Random measurement error and regression  
25  
26  
27 8 dilution bias. *BMJ.* 2010;340:c2289.  
28  
29  
30  
31 9 40. Kettaneh A, Oppert JM, Heude B, et al. Changes in physical activity explain  
32  
33  
34 10 paradoxical relationship between baseline physical activity and adiposity changes in  
35  
36  
37 11 adolescent girls: the FLVS II study. *Int J Obes (Lond).* 2005;29:586-93.  
38  
39  
40  
41 12 41. Herman Hansen B, Bortnes I, Hildebrand M, et al. Validity of the ActiGraph GT1M  
42  
43  
44 13 during walking and cycling. *J Sports Sci.* 2014;32:510-6.  
45  
46  
47  
48 14 42. van Sluijs EM, Sharp SJ, Ambrosini GL, et al. The independent prospective  
49  
50  
51 15 associations of activity intensity and dietary energy density with adiposity in young  
52  
53  
54 16 adolescents. *Br J Nutr.* 2016;115:921-9.  
55  
56  
57  
58  
59  
60

- 1  
2  
3  
4 1 43. Hjorth MF, Chaput JP, Ritz C, et al. Fatness predicts decreased physical activity  
5  
6  
7 2 and increased sedentary time, but not vice versa: support from a longitudinal study in  
8  
9  
10 3 8- to 11-year-old children. *Int J Obes (Lond)*. 2014;38:959-65.  
11  
12  
13  
14 4 44. Jago R, Salway RE, Ness AR, et al. Associations between physical activity and  
15  
16  
17 5 asthma, eczema and obesity in children aged 12-16: an observational cohort study.  
18  
19  
20  
21 6 *BMJ Open*. 2019;9:e024858. doi:10.1136/bmjopen-2018-024858.  
22  
23  
24  
25 7  
26  
27  
28  
29  
30  
31  
32  
33  
34  
35  
36  
37  
38  
39  
40  
41  
42  
43  
44  
45  
46  
47  
48  
49  
50  
51  
52  
53  
54  
55  
56  
57  
58  
59  
60

## Supplementary file

Appendix Table 1. Association between minutes per day spent in sedentary activity (CPM 0 – 99) at baseline and changes in body composition, adjusted for puberty<sup>#</sup>.

|                              | Boys (n = 143) |             |         | Girls (n = 256) |              |         |
|------------------------------|----------------|-------------|---------|-----------------|--------------|---------|
|                              | Beta           | 95% CI      | p value | Beta            | 95% CI       | p value |
| <b>Δ BMI</b>                 |                |             |         |                 |              |         |
| Model 1                      | -0.02          | -0.14, 0.09 | 0.70    | -0.05           | -0.15, 0.05  | 0.32    |
| Model 2                      | -0.02          | -0.17, 0.13 | 0.82    | -0.10           | -0.24, 0.03  | 0.14    |
| Model 3                      | 0.02           | -0.18, 0.22 | 0.85    | -0.10           | -0.26, 0.06  | 0.20    |
| <b>Δ waist circumference</b> |                |             |         |                 |              |         |
| Model 1                      | 0.12           | -0.27, 0.51 | 0.55    | -0.01           | -0.42, 0.40  | 0.96    |
| Model 2                      | 0.24           | -0.28, 0.76 | 0.37    | -0.38           | -0.92, 0.16  | 0.16    |
| Model 3                      | 0.38           | -0.30, 1.05 | 0.27    | -0.52           | -1.15, 0.11  | 0.10    |
| <b>Δ FMI</b>                 |                |             |         |                 |              |         |
| Model 1                      | -0.01          | -0.12, 0.09 | 0.84    | -0.01           | -0.11, 0.08  | 0.80    |
| Model 2                      | -0.02          | -0.16, 0.13 | 0.83    | -0.06           | -0.18, 0.07  | 0.36    |
| Model 3                      | 0.01           | -0.18, 0.19 | 0.96    | -0.05           | -0.20, 0.10  | 0.49    |
| <b>Δ LMI</b>                 |                |             |         |                 |              |         |
| Model 1                      | 0.00           | -0.05, 0.06 | 0.90    | -0.06           | -0.09, -0.02 | < 0.01  |
| Model 2                      | 0.00           | -0.07, 0.08 | 0.90    | -0.07           | -0.11, -0.02 | < 0.01  |
| Model 3                      | 0.02           | -0.07, 0.10 | 0.73    | -0.07           | -0.13, -0.02 | < 0.01  |
| <b>Δ aLMI</b>                |                |             |         |                 |              |         |
| Model 1                      | -0.00          | -0.03, 0.03 | 0.91    | -0.02           | -0.04, -0.00 | 0.02    |
| Model 2                      | 0.00           | -0.04, 0.04 | 0.97    | -0.03           | -0.05, -0.00 | 0.03    |
| Model 3                      | 0.01           | -0.04, 0.06 | 0.65    | -0.03           | -0.05, 0.00  | 0.08    |

<sup>#</sup>: The table displays the association between minutes spent in sedentary activity and difference in BMI (kg/m<sup>2</sup>), waist circumference, FMI (fat mass in kg/m<sup>2</sup>), LMI (lean mass in kg/m<sup>2</sup>) and aLMI (appendicular lean mass in kg/m<sup>2</sup>) between Fit Futures 1 (2010-2011) and Fit Futures 2 (2012-2013). The models give the beta coefficient for 30 minutes increase in sedentary activity. All models were adjusted for baseline values of the outcome. In model 2 also adjusted for time between measurements and baseline values of pubertal development (pds (boys) and age at menarche (girls)), screen time on weekdays, study specialisation, age in half-years, regularity of eating breakfast and device wear time. In Model 3 adjusted also for minutes spent in Moderate-to-vigorous physical activity (CPM ≥ 1952).

Appendix Table 2. Association between minutes per day spent in light activity (CPM 100 – 1951) at baseline and changes in body composition, adjusted for puberty<sup>#</sup>.

|                              | Boys (n = 143) |             |         | Girls (n = 256) |             |         |
|------------------------------|----------------|-------------|---------|-----------------|-------------|---------|
|                              | Beta           | 95% CI      | p value | Beta            | 95% CI      | p value |
| <b>Δ BMI</b>                 |                |             |         |                 |             |         |
| Model 1                      | 0.05           | -0.10, 0.20 | 0.53    | 0.04            | -0.10, 0.18 | 0.56    |
| Model 2                      | 0.00           | -0.18, 0.19 | 0.98    | 0.11            | -0.05, 0.27 | 0.17    |
| Model 3                      | -0.02          | -0.22, 0.18 | 0.85    | 0.10            | -0.06, 0.26 | 0.20    |
| <b>Δ waist circumference</b> |                |             |         |                 |             |         |
| Model 1                      | -0.01          | -0.53, 0.51 | 0.97    | 0.53            | -0.01, 1.06 | 0.05    |
| Model 2                      | -0.34          | -0.97, 0.29 | 0.29    | 0.51            | -0.11, 1.13 | 0.11    |
| Model 3                      | -0.38          | -1.05, 0.30 | 0.27    | 0.52            | -0.11, 1.15 | 0.11    |
| <b>Δ FMI</b>                 |                |             |         |                 |             |         |
| Model 1                      | 0.05           | -0.09, 0.18 | 0.51    | 0.02            | -0.11, 0.14 | 0.80    |
| Model 2                      | 0.01           | -0.16, 0.18 | 0.93    | 0.06            | -0.09, 0.20 | 0.43    |
| Model 3                      | -0.01          | -0.19, 0.18 | 0.96    | 0.05            | -0.10, 0.20 | 0.49    |
| <b>Δ LMI</b>                 |                |             |         |                 |             |         |
| Model 1                      | -0.01          | -0.08, 0.06 | 0.84    | 0.04            | -0.01, 0.09 | 0.09    |
| Model 2                      | -0.01          | -0.10, 0.07 | 0.80    | 0.08            | 0.02, 0.13  | < 0.01  |
| Model 3                      | -0.02          | -0.10, 0.07 | 0.73    | 0.07            | 0.02, 0.13  | < 0.01  |
| <b>Δ aLMI</b>                |                |             |         |                 |             |         |
| Model 1                      | 0.00           | -0.04, 0.04 | 0.93    | 0.02            | -0.01, 0.04 | 0.19    |
| Model 2                      | -0.01          | -0.05, 0.04 | 0.78    | 0.03            | -0.00, 0.06 | 0.06    |
| Model 3                      | -0.01          | -0.06, 0.04 | 0.65    | 0.03            | -0.00, 0.05 | 0.08    |

<sup>#</sup>: The table displays the association between minutes spent in light activity and difference in BMI (kg/m<sup>2</sup>), waist circumference, FMI (fat mass in kg/m<sup>2</sup>), LMI (lean mass in kg/m<sup>2</sup>) and aLMI (appendicular lean mass in kg/m<sup>2</sup>) between Fit Futures 1 (2010-2011) and Fit Futures 2 (2012-2013). The models give the beta coefficient for 30 minutes increase in light activity. All models were adjusted for baseline values of the outcome. In model 2 also adjusted for time between measurements and baseline values of pubertal development (pds (boys) and age at menarche (girls)), screen time on weekdays, study specialisation, age in half-years, regularity of eating breakfast and device wear time. In Model 3 adjusted also for minutes spent in Moderate-to-vigorous physical activity (CPM ≥ 1952).

Appendix Table 3. Association between minutes per day spent in MVPA (CPM  $\geq$  1952) at baseline and changes in body composition, adjusted for puberty<sup>#</sup>.

|                              | Boys (n = 143) |             |         | Girls (n = 256) |             |         |
|------------------------------|----------------|-------------|---------|-----------------|-------------|---------|
|                              | Beta           | 95% CI      | p value | Beta            | 95% CI      | p value |
| $\Delta$ BMI                 |                |             |         |                 |             |         |
| Model 1                      | 0.11           | -0.08, 0.31 | 0.24    | -0.01           | -0.17, 0.16 | 0.95    |
| Model 2                      | 0.06           | -0.15, 0.28 | 0.55    | 0.07            | -0.12, 0.25 | 0.48    |
| $\Delta$ waist circumference |                |             |         |                 |             |         |
| Model 1                      | 0.28           | -0.38, 0.95 | 0.40    | -0.03           | -0.69, 0.63 | 0.94    |
| Model 2                      | -0.03          | -0.77, 0.72 | 0.95    | -0.00           | -0.72, 0.72 | 0.99    |
| $\Delta$ FMI                 |                |             |         |                 |             |         |
| Model 1                      | 0.02           | -0.16, 0.20 | 0.80    | -0.01           | -0.17, 0.14 | 0.86    |
| Model 2                      | 0.04           | -0.16, 0.24 | 0.68    | 0.05            | -0.12, 0.22 | 0.55    |
| $\Delta$ LMI                 |                |             |         |                 |             |         |
| Model 1                      | 0.08           | -0.02, 0.17 | 0.11    | 0.03            | -0.03, 0.09 | 0.35    |
| Model 2                      | 0.01           | -0.09, 0.11 | 0.81    | 0.02            | -0.04, 0.09 | 0.49    |
| $\Delta$ aLMI                |                |             |         |                 |             |         |
| Model 1                      | 0.05           | -0.01, 0.10 | 0.09    | 0.02            | -0.01, 0.05 | 0.14    |
| Model 2                      | 0.02           | -0.04, 0.07 | 0.60    | 0.02            | -0.01, 0.05 | 0.20    |

<sup>#</sup>: The table displays the association between minutes spent in moderate-to-vigorous physical activity (MVPA) and difference in BMI (kg/m<sup>2</sup>), waist circumference, FMI (fat mass in kg/m<sup>2</sup>), LMI (lean mass in kg/m<sup>2</sup>) and aLMI (appendicular lean mass in kg/m<sup>2</sup>) between Fit Futures 1 (2010-2011) and Fit Futures 2 (2012-2013). The models give the beta coefficient for 15 minutes increase in MVPA. Both models were adjusted for baseline values of the outcome. In model 2 also adjusted for time between measurements and baseline values of pubertal development (pds (boys) and age at menarche (girls)), screen time on weekdays, study specialisation, age in half-years, regularity of eating breakfast and device wear time.

**STROBE** statement for submitted manuscript entitled “*The association between objectively measured physical activity and longitudinal changes in body composition in adolescents; The Tromsø Study Fit Futures Cohort.*”

|                           | <b>Item No</b> | <b>Recommendation</b>                                                                                                                            |
|---------------------------|----------------|--------------------------------------------------------------------------------------------------------------------------------------------------|
| <b>Title and abstract</b> | 1              | (a) P. 1, lines 1-2.<br>(b) P. 3, lines 1-23.                                                                                                    |
| <b>Introduction</b>       |                |                                                                                                                                                  |
| Background/rationale      | 2              | P. 5, lines 1-25 and P. 6, lines 1-3.                                                                                                            |
| Objectives                | 3              | P. 6, lines 3-8.                                                                                                                                 |
| <b>Methods</b>            |                |                                                                                                                                                  |
| Study design              | 4              | P. 6, lines 11-16.                                                                                                                               |
| Setting                   | 5              | P. 6, lines 11-23.                                                                                                                               |
| Participants              | 6              | (a) P. 6, lines 18-23.                                                                                                                           |
| Variables                 | 7              | P. 8, lines 8-25. P. 9, lines 1-22.                                                                                                              |
| Data sources/ measurement | 8*             | P. 6, lines 17-23. P. 7, lines 1-25. P. 8, lines 1-14.                                                                                           |
| Bias                      | 9              | P. 9, lines 12-23.                                                                                                                               |
| Study size                | 10             | P. 6, lines 11-23.                                                                                                                               |
| Quantitative variables    | 11             | P. 9, lines 8-12.                                                                                                                                |
| Statistical methods       | 12             | (a) P. 8, lines 22-25 and P. 9, lines 1-24.<br>(b) P. 9, lines 20-24.<br>(c) P. 6, lines 19-22.<br><br>(e) P. 18, lines 21-25 and P. 19, line 1. |
| <b>Results</b>            |                |                                                                                                                                                  |
| Participants              | 13*            | (a) P. 6, lines 11-23.<br>(b) See (a).                                                                                                           |
| Descriptive data          | 14*            | (a) See Table 1.<br>(b) See 13a<br>(c) See Table 1.                                                                                              |
| Outcome data              | 15*            | See Table 1.                                                                                                                                     |
| Main results              | 16             | (a) See Tables and P. 9, lines 6-20.<br>(b) See Table 1.                                                                                         |
| Other analyses            | 17             | P. 9, lines 20-23, and P. 17, lines 18-24. P. 18, lines 21-25 and P. 19, line 1.                                                                 |
| <b>Discussion</b>         |                |                                                                                                                                                  |
| Key results               | 18             | P. 15, lines 2-8.                                                                                                                                |
| Limitations               | 19             | P. 16, lines 17-21. P. 17, lines 18-25. P. 18, lines 1-7.                                                                                        |
| Interpretation            | 20             | P. 15, lines 9 – 25. P. 16, 1-25. P. 17, lines 1-25. P. 18, lines 1-7.                                                                           |
| Generalisability          | 21             | P. 19, lines 4-6.                                                                                                                                |
| <b>Other information</b>  |                |                                                                                                                                                  |
| Funding                   | 22             | P. 20, lines 16.                                                                                                                                 |



# BMJ Open

## The association between objectively measured physical activity and longitudinal changes in body composition in adolescents; The Tromsø Study Fit Futures Cohort.

|                                 |                                                                                                                                                                                                                                                                                                                                                                                                                                                                                                                                                                                                                                                                                                                                                                                                                                                                                                                                                                                  |
|---------------------------------|----------------------------------------------------------------------------------------------------------------------------------------------------------------------------------------------------------------------------------------------------------------------------------------------------------------------------------------------------------------------------------------------------------------------------------------------------------------------------------------------------------------------------------------------------------------------------------------------------------------------------------------------------------------------------------------------------------------------------------------------------------------------------------------------------------------------------------------------------------------------------------------------------------------------------------------------------------------------------------|
| Journal:                        | <i>BMJ Open</i>                                                                                                                                                                                                                                                                                                                                                                                                                                                                                                                                                                                                                                                                                                                                                                                                                                                                                                                                                                  |
| Manuscript ID                   | bmjopen-2020-036991.R2                                                                                                                                                                                                                                                                                                                                                                                                                                                                                                                                                                                                                                                                                                                                                                                                                                                                                                                                                           |
| Article Type:                   | Original research                                                                                                                                                                                                                                                                                                                                                                                                                                                                                                                                                                                                                                                                                                                                                                                                                                                                                                                                                                |
| Date Submitted by the Author:   | 13-Aug-2020                                                                                                                                                                                                                                                                                                                                                                                                                                                                                                                                                                                                                                                                                                                                                                                                                                                                                                                                                                      |
| Complete List of Authors:       | Aars, Nils; UiT The Arctic University of Norway, Department of Community Medicine; Nordlandssykehuset HF<br>Beldo, Sigurd; UiT Arctic University of Norway, School of Sport Sciences<br>Jacobsen, Bjarne; UiT The Arctic University of Norway, Department of Community Medicine; UiT The Arctic University of Norway, Centre for Sami Health Research<br>Horsch, Alexander; UiT The Arctic University of Norway, Department of Computer Science<br>Morseth, Bente; UiT Arctic University of Norway, School of Sport Sciences; UiT The Arctic University of Norway, Department of Community Medicine<br>Emaus, Nina; UiT The Arctic University of Norway, Department of Health and Care Sciences<br>Furberg, Anne-Sofie; UiT The Arctic University of Norway, Department of Community Medicine; Universitetssykehuset Nord-Norge, Department of Microbiology and Infection Control<br>Grimsgaard, Sameline; UiT The Arctic University of Norway, Department of Community Medicine |
| <b>Primary Subject Heading</b>: | Public health                                                                                                                                                                                                                                                                                                                                                                                                                                                                                                                                                                                                                                                                                                                                                                                                                                                                                                                                                                    |
| Secondary Subject Heading:      | Sports and exercise medicine, Epidemiology                                                                                                                                                                                                                                                                                                                                                                                                                                                                                                                                                                                                                                                                                                                                                                                                                                                                                                                                       |
| Keywords:                       | EPIDEMIOLOGY, PUBLIC HEALTH, SPORTS MEDICINE                                                                                                                                                                                                                                                                                                                                                                                                                                                                                                                                                                                                                                                                                                                                                                                                                                                                                                                                     |
|                                 |                                                                                                                                                                                                                                                                                                                                                                                                                                                                                                                                                                                                                                                                                                                                                                                                                                                                                                                                                                                  |

SCHOLARONE™  
Manuscripts



I, the Submitting Author has the right to grant and does grant on behalf of all authors of the Work (as defined in the below author licence), an exclusive licence and/or a non-exclusive licence for contributions from authors who are: i) UK Crown employees; ii) where BMJ has agreed a CC-BY licence shall apply, and/or iii) in accordance with the terms applicable for US Federal Government officers or employees acting as part of their official duties; on a worldwide, perpetual, irrevocable, royalty-free basis to BMJ Publishing Group Ltd ("BMJ") its licensees and where the relevant Journal is co-owned by BMJ to the co-owners of the Journal, to publish the Work in this journal and any other BMJ products and to exploit all rights, as set out in our [licence](#).

The Submitting Author accepts and understands that any supply made under these terms is made by BMJ to the Submitting Author unless you are acting as an employee on behalf of your employer or a postgraduate student of an affiliated institution which is paying any applicable article publishing charge ("APC") for Open Access articles. Where the Submitting Author wishes to make the Work available on an Open Access basis (and intends to pay the relevant APC), the terms of reuse of such Open Access shall be governed by a Creative Commons licence – details of these licences and which [Creative Commons](#) licence will apply to this Work are set out in our licence referred to above.

Other than as permitted in any relevant BMJ Author's Self Archiving Policies, I confirm this Work has not been accepted for publication elsewhere, is not being considered for publication elsewhere and does not duplicate material already published. I confirm all authors consent to publication of this Work and authorise the granting of this licence.

1  
2  
3  
4 1 **The association between objectively measured physical activity and longitudinal**  
5  
6  
7 2 **changes in body composition in adolescents; The Tromsø Study Fit Futures Cohort.**  
8  
9

10  
11 3 Nils Abel Aars<sup>1, 2\*</sup>  
12

13  
14  
15 4 Sigurd Beldo<sup>3</sup>  
16

17  
18  
19 5 Bjarne K Jacobsen<sup>1, 4</sup>  
20  
21

22  
23 6 Alexander Horsch<sup>5</sup>  
24  
25

26  
27 7 Bente Morseth<sup>3, 1</sup>  
28  
29

30  
31 8 Nina Emaus<sup>6</sup>  
32  
33

34  
35 9 Anne-Sofie Furberg<sup>1, 7</sup>  
36  
37

38  
39 10 Sameline Grimsgaard<sup>1</sup>  
40  
41

42  
43  
44 11  
45

46  
47  
48 12 **Affiliations**  
49

50  
51  
52 13 1. Department of Community Medicine, UiT The Arctic University of Norway, Tromsø,  
53

54  
55  
56 14 Norway  
57  
58  
59  
60

- 1  
2  
3  
4 1 2. Nordland Hospital, Bodø, Norway.  
5  
6  
7  
8 2 3. School of Sport Sciences, UiT The Arctic University of Norway, Alta, Norway  
9  
10  
11  
12 3 4. Centre for Sami Health Research, Department of Community Medicine, UiT The  
13  
14  
15 4 Arctic University of Norway, Tromsø, Norway  
16  
17  
18  
19 5 5. Department of Computer Science, UiT The Arctic University of Norway, Tromsø,  
20  
21  
22  
23 6 Norway  
24  
25  
26  
27 7 6. Department of Health and Care Sciences, UiT The Arctic University of Norway,  
28  
29  
30 8 Tromsø, Norway  
31  
32  
33  
34 9 7. Department of Microbiology and Infection Control, University Hospital of North  
35  
36  
37  
38 10 Norway, Tromsø, Norway  
39  
40  
41  
42 11 \* Corresponding author. Correspondence to [nils.a.aars@uit.no](mailto:nils.a.aars@uit.no)  
43  
44  
45  
46 12 Nils Abel Aars  
47  
48  
49  
50 13 Department of Community Medicine  
51  
52  
53  
54 14 UiT The Arctic University of Norway  
55  
56  
57  
58 15 9037 Tromsø, Norway.  
59  
60

1  
2  
3  
4  
5  
6  
7  
8  
9  
10  
11  
12  
13  
14  
15  
16  
17  
18  
19  
20  
21  
22  
23  
24  
25  
26  
27  
28  
29  
30  
31  
32  
33  
34  
35  
36  
37  
38  
39  
40  
41  
42  
43  
44  
45  
46  
47  
48  
49  
50  
51  
52  
53  
54  
55  
56  
57  
58  
59  
60

1

2 Word count: 3992

For peer review only

1  
2  
3  
4 1 **Abstract**

5  
6  
7 2 **Objectives:** Physical activity may be important in deterring the obesity epidemic. This  
8  
9  
10  
11 3 study aimed to determine if objectively measured physical activity in first year of  
12  
13  
14 4 upper secondary high school predicted changes in body composition over two years  
15  
16  
17  
18 5 of follow-up in a cohort of Norwegian adolescents (n =431).

19  
20  
21  
22 6 **Design:** A longitudinal study of adolescents (mean age 16 (SD 0.4) at baseline,  
23  
24  
25  
26 7 60.3% girls) participating in the Fit Futures studies 1 (2010-11) and 2 (2012-13).

27  
28  
29  
30 8 **Setting:** All eight upper secondary high schools in two municipalities in Northern  
31  
32  
33 9 Norway.

34  
35  
36  
37 10 **Participants:** Students participating in both studies and under the age of 18 at  
38  
39  
40  
41 11 baseline, and with valid measurement of physical activity at baseline and body  
42  
43  
44 12 composition in both surveys.

45  
46  
47  
48 13 **Primary- and secondary outcomes:** Change in objectively measured body mass index  
49  
50  
51  
52 14 and waist circumference, and change in dual-energy x-ray absorptiometry measured  
53  
54  
55  
56 15 fat mass index (FMI), lean mass index (LMI) and appendicular lean mass index  
57  
58  
59 16 (aLMI) between baseline and follow-up.  
60

1  
2  
3  
4 1 **Results:** At baseline, boys had significantly higher physical activity volume ( $p=0.01$ )  
5  
6  
7 2 and spent on average 6.4 (95% CI: 2.1, 10.6) more minutes in moderate-to-vigorous  
8  
9  
10 3 physical activity (MVPA) than girls ( $p < 0.01$ ). In girls, multivariate regression analyses  
11  
12  
13  
14 4 showed that more sedentary time was negatively associated with changes in LMI ( $p$   
15  
16  
17 5  $< 0.01$ ) and aLMI ( $p < 0.05$ ), whereas more light activity had opposite effects on  
18  
19  
20  
21 6 these measures ( $p < 0.01$  and  $p < 0.05$ , respectively). No significant associations  
22  
23  
24 7 between measures of baseline physical activity and changes in body composition  
25  
26  
27  
28 8 parameters was observed in boys.

29  
30  
31  
32 9 **Conclusions:** In this cohort of Norwegian adolescents, sedentary and light physical  
33  
34  
35 10 activity was associated with changes in LMI and aLMI in girls, but not boys. Minutes  
36  
37  
38  
39 11 spent in MVPA in first year of upper secondary high school was not associated with  
40  
41  
42 12 changes in measures of body composition in neither sex after two years.

### 43 44 45 46 13 **Strengths and limitations of this study**

- 47  
48  
49  
50  
51 14 • This study used objective measures of physical activity.

- 1  
2  
3  
4 1 • The study included objectively measured weight, height and waist  
5  
6  
7 2 circumference, and dual-energy x-ray absorptiometry (DXA) measures of fat-  
8  
9  
10 3 and lean mass.  
11  
12  
13  
14 4 • We were not able to fully adjust for nutrition and not for pubertal development.  
15  
16  
17 5 • The 431 participants with complete data from both baseline and follow-up  
18  
19  
20 6 represents 41% of those attending Fit Futures 1, indicating a degree of  
21  
22  
23  
24 7 selection.  
25  
26  
27  
28 8  
29  
30  
31  
32 9  
33  
34  
35  
36  
37  
38  
39  
40  
41  
42  
43  
44  
45  
46  
47  
48  
49  
50  
51  
52  
53  
54  
55  
56  
57  
58  
59  
60



## 1 Background

2 The potential of physical activity to prevent or treat a number of diseases has been  
3 highlighted by the World Health Organization,[1] with inactivity accounting for 9% of  
4 worldwide premature mortality.[2] Public health guidelines state that adolescents  
5 should engage in Moderate-to-Vigorous Physical Activity (MVPA)  $\geq$  60 minutes per  
6 day,[3] but in 2011, only 50% of Norwegian 15 year olds met these  
7 recommendations.[4] During adolescence there is a decline in both total physical  
8 activity and MVPA,[5, 6] and many quit or reduce participation in organized sports.[7]  
9 As of 2013, the prevalence of overweight and obesity (Body Mass Index (BMI)  $\geq$  25  
10 kg/m<sup>2</sup>) in Norwegians aged <20 years appear to be stabilizing at around 20% in boys  
11 and 16% in girls - comparable to the Nordic countries.[8] This is lower than in the  
12 United States (around 29% in boys and girls), [8] but the health effects for those  
13 concerned may still be substantial over the long term.[9]  
14 While physical activity has many positive health effects, its relationship with adiposity  
15 is less clear and it has proven difficult to determine causality, direction and magnitude  
16 of this relationship.[10] Cross-sectional research typically shows a strong inverse

1  
2  
3  
4 1 association between physical activity and weight status,[11] but temporality cannot be  
5  
6  
7 2 ascertained using such study designs.[12] Longitudinal studies may ascertain if lower  
8  
9  
10 3 physical activity precedes excess weight gain, but a review found no evidence for a  
11  
12  
13  
14 4 relationship between objectively measured physical activity and body fat gain in  
15  
16  
17 5 adolescents.[12] The lack of congruent results may in part be explained by the  
18  
19  
20  
21 6 diverse and inadequate measures of both exposure and outcome used in research of  
22  
23  
24 7 the association between physical activity and body composition.[10, 11]  
25  
26  
27  
28 8 Although many methods to measure physical activity are available, the most common  
29  
30  
31  
32 9 and most feasible is self-report which commonly overestimates the total amount of  
33  
34  
35  
36 10 physical activity.[13] Body composition is most commonly assessed using BMI, but  
37  
38  
39 11 BMI does not distinguish between fat- and muscle mass.[14] This has the potential to  
40  
41  
42  
43 12 cause misclassification of overweight status and may attenuate a true association  
44  
45  
46 13 between physical activity and fat or muscle mass. Thus, in the current study, we  
47  
48  
49  
50 14 sought to overcome these limitations by applying objective measures of both physical  
51  
52  
53 15 activity and specific measures of body composition. Our aim was to investigate the  
54  
55  
56  
57 16 association between objectively measured physical activity and changes in five  
58  
59  
60 17 different measures of body composition (body mass index, waist circumference, fat

1  
2  
3  
4 1 mass index, lean mass index and appendicular lean mass index) over two years of  
5  
6  
7 2 follow-up in a cohort of Norwegian adolescents.  
8  
9

#### 10 11 3 12 13 14 15 4 **Methods and materials** 16

17  
18  
19 5 We used data from the first and second Fit Futures cohort studies, performed in  
20  
21  
22  
23 6 2010-2011 and 2012-2013, respectively. In the first study we invited all students  
24  
25  
26 7 (n=1,117) in their first year of upper secondary high school in the neighbouring  
27  
28  
29  
30 8 municipalities of Tromsø and Balsfjord in Northern Norway, and 93% participated.  
31

32  
33 9 The study was repeated two years later, when the students were in their last year of  
34  
35  
36  
37 10 upper secondary high school or had started as apprentices if they studied vocational  
38  
39  
40 11 subjects. The second study included 868 participants, giving an attendance of 77%.  
41

42  
43  
44 12 All eight upper secondary high schools in the two municipalities participated in both  
45  
46  
47 13 studies. Altogether 735 adolescents attended both surveys. For the present study we  
48  
49  
50  
51 14 excluded those aged  $\geq 18$  years of age at baseline (n = 38). Some participants (n =  
52  
53  
54 15 240) did not have valid measurements of physical activity at baseline, and were  
55  
56  
57  
58 16 therefore not included in the study. We also excluded those with missing data on  
59  
60

1  
2  
3  
4 1 change in body composition parameters or variables included in the model (n = 26).  
5  
6  
7 2 Thus, 431 participants were included in the present study (60.3% girls). Appendix  
8  
9  
10 3 Table 1 includes descriptive characteristics of the boys and girls with a valid baseline  
11  
12  
13  
14 4 measurement of physical activity and variables included in the analyses, but who  
15  
16  
17 5 were missing follow-up data on body composition parameters (n = 133).  
18  
19  
20  
21 6 Students were granted leave of absence from school to attend an examination at the  
22  
23  
24  
25 7 Clinical Research Unit at the University Hospital of Northern Norway in both surveys.  
26  
27  
28 8 The participants attended a clinical examination where they also completed a  
29  
30  
31  
32 9 questionnaire, which included questions on lifestyle, screen time, dietary habits etc.  
33  
34  
35  
36 10 The participants signed a letter of informed consent, and those under the age of 16  
37  
38  
39 11 brought a letter of consent signed by their parent or guardian.  
40  
41  
42  
43 12 All measurements were performed by trained personnel. Height was measured to the  
44  
45  
46  
47 13 nearest centimeter and weight to the nearest 100 gram, wearing light clothing and  
48  
49  
50 14 using an automatic electronic scale/stadiometer (Jenix DS 102 stadiometer, Dong  
51  
52  
53  
54 15 Sahn Jenix, Seoul, Korea). Body mass index was calculated as body weight in  
55  
56  
57 16 kilograms/height in meters<sup>2</sup>. Waist circumference was measured to the nearest 0.1  
58  
59  
60

1  
2  
3  
4 1 centimeter at the height of the umbilicus. Fat and soft tissue lean mass in grams was  
5  
6  
7 2 estimated by whole-body dual energy X-ray absorptiometry (DXA) (GE Lunar  
8  
9  
10 3 Prodigy, Lunar Corporation, Madison, WI, USA). Fat mass comprises all fat, while  
11  
12  
13  
14 4 soft tissue lean mass comprises all bodily tissue except fat and skeletal mass. These  
15  
16  
17 5 variables were used to calculate fat mass index (FMI, fat mass in kilograms/height in  
18  
19  
20  
21 6 meters<sup>2</sup>) and lean mass index (LMI, lean mass in kilograms/height in meters<sup>2</sup>). In  
22  
23  
24  
25 7 addition we calculated appendicular lean mass index (aLMI), which is the sum of soft  
26  
27  
28 8 tissue lean mass in kilograms in all four extremities divided by height in meters<sup>2</sup>.  
29  
30  
31 9 Although most commonly used in studies of sarcopenia in elderly,[15] this body  
32  
33  
34  
35 10 composition parameter is arguably more specific to skeletal muscle mass than total  
36  
37  
38  
39 11 lean mass index. The ability of DXA to detect changes in appendicular lean mass in  
40  
41  
42  
43  
44  
45 12 young adolescents is good, and has been validated against Magnetic Resonance  
46  
47  
48  
49  
50  
51  
52  
53 13 Imaging (MRI).[16]  
54  
55  
56  
57 14 Physical activity was objectively measured using the ActiGraph GT3X accelerometer  
58  
59  
60  
61 15 (ActiGraph, LLC, Pensacola, USA). Participants were instructed to wear the device  
62  
63  
64  
65 16 on their right hip for seven consecutive days, and to remove it only when showering,  
66  
67  
68  
69  
70  
71 17 swimming or sleeping. The ActiLife software was used to initialize the accelerometer

1  
2  
3  
4 1 and download data, which was imported into the Quality Control & Analysis Tool  
5  
6  
7 2 (QCAT) for data processing. This software was developed by the research group of  
8  
9  
10 3 professor Horsch in Matlab (The MathWorks, Inc., Massachusetts, USA) for  
11  
12  
13  
14 4 processing of accelerometer data. The accelerometer was set in raw data mode, with  
15  
16  
17 5 a sampling frequency of 30 Hertz and with normal filtering epochs of 10 seconds.  
18  
19  
20  
21 6 Data collection was initiated at 14:00 hours the first day, and concluded at 23:58 on  
22  
23  
24 7 the 8<sup>th</sup> day of measurement. We excluded data from the first day of measurement to  
25  
26  
27  
28 8 reduce reactivity bias. The criteria for a valid measurement of physical activity was  
29  
30  
31 9 wear time of  $\geq$  four consecutive days, with  $\geq$  ten hours wear time per day. This has  
32  
33  
34  
35 10 been demonstrated as representative of activity over a full week.[17] The triaxial  
36  
37  
38 11 algorithm developed by Hecht et al. was used to calculate wear time.[18] Minutes per  
39  
40  
41  
42 12 day in sedentary (0 – 99 CPM), light (100 – 1951 CPM), moderate (1952 – 5723  
43  
44  
45 13 CPM) and vigorous ( $\geq$  5724 CPM) physical activity was determined using the cut-offs  
46  
47  
48  
49 14 developed by Freedson.[19] The choice of these cut-offs enables direct comparisons  
50  
51  
52 15 as the cohort ages, and although these cut-offs are not commonly used for  
53  
54  
55  
56 16 adolescents, we consider the bodily proportions of an adolescent to resemble that of  
57  
58  
59 17 an adult in terms of measured acceleration. The device collected data in both  
60

1  
2  
3 1 uniaxial- and triaxial mode, but in the present study only the uniaxial data had been  
4  
5  
6  
7 2 processed and therefore available. Studies have shown that uniaxial data recorded  
8  
9  
10 3 from the GT3X correlate well with uniaxial data recorded from previous ActiGraph  
11  
12  
13  
14 4 models.[20] Data on objectively measured physical activity was only available from  
15  
16  
17 5 Fit Futures 1.  
18  
19  
20  
21 6 Baseline characteristics were presented as means with standard deviation (SD) or  
22  
23  
24  
25 7 prevalence in percentages with number of subjects (n) (Table 1). Sex-specific  
26  
27  
28 8 difference in body composition between baseline and follow-up was tested using a  
29  
30  
31  
32 9 paired samples t-test. The difference in physical activity between sexes was tested  
33  
34  
35  
36 10 using a two-sample t-test, while sex differences in categories of minutes spent in  
37  
38  
39 11 MVPA was tested using a chi-square test. Difference in linear trend across categories  
40  
41  
42  
43 12 of minutes spent in MVPA was tested using STATA's non-parametric test for trend,  
44  
45  
46 13 developed by Cuzick.[21] Linear regression was used to determine the effect of  
47  
48  
49 14 baseline physical activity on change in body composition, i.e., the change in BMI,  
50  
51  
52  
53 15 waist circumference, FMI, LMI and aLMI from the first to the second Fit Futures  
54  
55  
56 16 Study.  
57  
58  
59  
60

1  
2  
3  
4 1 We used three different predictors of change in body composition, performing three  
5  
6  
7 2 sets of analyses, with first; minutes per day spent in sedentary activity (Table 2)  
8  
9  
10 3 second; minutes per day spent in light activity (Table 3) and third; minutes per day  
11  
12  
13  
14 4 spent in MVPA (Table 4). We divided the continuous variables sedentary- and light  
15  
16  
17 5 activity by 30 and the continuous variable MVPA by 15 before inclusion in the  
18  
19  
20  
21 6 models, thus presenting the beta coefficient for change in body composition  
22  
23  
24 7 parameter per 30 minutes of sedentary- or light activity, or per 15 minutes of MVPA,  
25  
26  
27  
28 8 with 95% confidence intervals and a p-value. In model 1 we adjusted for the baseline  
29  
30  
31 9 measurement of the body composition parameter. In the adjusted models (models 2)  
32  
33  
34  
35 10 we also included time between measurements (mean (SD): 730 (74) days) and  
36  
37  
38 11 baseline values of device wear time, age in half years and questionnaire data on  
39  
40  
41  
42 12 screen time on weekdays (how many hours per weekday the students spent in front  
43  
44  
45 13 of a computer or television - answers ranged from none to more than ten hours per  
46  
47  
48  
49 14 weekday) and regularity of eating breakfast as an indicator of healthy meal patterns  
50  
51  
52 15 (answers ranging from rarely/never to every day). In the analyses of sedentary- and  
53  
54  
55  
56 16 light activity we also adjusted for minutes spent in MVPA (models 3). In a subset of  
57  
58  
59 17 analyses (Appendix Tables 2 - 4) we repeated the analyses performed in Table 2 - 4,  
60



1  
2  
3 1 adjusting also for self-reported pubertal status measured by either pubertal  
4  
5  
6  
7 2 development scale (boys) or age at menarche (girls). These analyses included the  
8  
9  
10 3 143 boys and 256 girls with valid data on pubertal status. In all the analyses, a p-  
11  
12  
13  
14 4 value of  $< 0.05$  was considered statistically significant.  
15  
16

17  
18 5 All analyses were performed sex-specific as decided a-priori, using STATA version  
19  
20  
21 6 14 (StataCorp. 2015. *Stata Statistical Software: Release 14*. College Station, TX:  
22  
23  
24  
25 7 StataCorp LP.).  
26  
27

## 28 29 8 **Patient and public involvement**

30  
31  
32  
33 9 Participating schools were consulted and included in the design phase of the study.  
34  
35  
36

## 37 10 **Results**

38  
39  
40  
41 11 Table 1 displays the participants' body composition measurements at baseline and  
42  
43  
44  
45 12 follow-up, as well as physical activity measurements at baseline. Boys had a  
46  
47  
48  
49 13 statistically significant increase in all measures of body composition. Girls had a  
50  
51  
52 14 statistically significant increase in body weight, BMI, fat mass in kg and FMI, but not  
53  
54  
55  
56 15 in LMI and appendicular lean mass. Boys were statistically significantly more  
57  
58  
59 16 physically active than girls in some aspects, with higher mean counts per minute  
60

1 (p=0.01) and more minutes in MVPA (p<0.01). Time spent in sedentary- or light  
 2 intensities did not differ significantly between sexes. Twenty-seven percent of boys  
 3 and 17% of girls complied with the recommendations of 60 minutes per day  
 4 Moderate-to-Vigorous Physical Activity (MVPA).

Table 1. Characteristics of the longitudinal cohort of the Tromsø Study; Fit Futures 2010-11 and 2012-13 <sup>◇</sup>.

|                                          | Boys (n = 171) |              | Girls (n = 260) |              |
|------------------------------------------|----------------|--------------|-----------------|--------------|
|                                          | FF1            | FF2          | FF1             | FF2          |
| Age (years)                              | 16.0 (0.4)     | 18.2 (0.4)   | 16.1 (0.4)      | 18.1 (0.4)   |
| Height (cm)                              | 177.1 (6.6)    | 179.0 (6.5)* | 165.4 (6.6)     | 166.1 (6.6)* |
| Body weight (kg)                         | 69.0 (12.3)    | 74.3 (13.0)* | 60.8 (10.8)     | 63.4 (11.6)* |
| Body mass index (BMI kg/m <sup>2</sup> ) | 22.0 (3.5)     | 23.2 (3.7)*  | 22.2 (3.7)      | 23.0 (4.0)*  |
| Waist circumference (cm)                 | 81.0 (10.3)    | 83.9 (10.9)* | 76.7 (9.8)      | 78.0 (10.8)* |
| Total Body Fat Mass (kg)                 | 13.3 (9.4)     | 15.6 (10.4)* | 19.9 (8.3)      | 21.7 (9.1)*  |
| Fat Mass Index (FMI kg/m <sup>2</sup> )  | 4.2 (3.0)      | 4.9 (3.2)*   | 7.3 (3.0)       | 7.9 (3.3)*   |
| Total Body Lean Mass (kg)                | 54.0 (6.5)     | 56.4 (6.9)*  | 38.9 (4.5)      | 39.3 (4.7)*  |
| Lean Mass Index (LMI kg/m <sup>2</sup> ) | 17.2 (1.6)     | 17.6 (1.8)*  | 14.2 (1.3)      | 14.2 (1.4)   |
| Appendicular Lean Mass (kg)              | 25.3 (3.4)     | 26.2 (3.6)*  | 17.4 (2.3)      | 17.4 (2.3)   |

|                                                        |                  |            |                            |            |
|--------------------------------------------------------|------------------|------------|----------------------------|------------|
| Appendicular Lean Mass Index (aLMI kg/m <sup>2</sup> ) | 8.1 (0.9)        | 8.2 (0.9)* | 6.4 (0.7)                  | 6.3 (0.7)* |
| Accelerometer variables                                |                  |            |                            |            |
| Wear time per valid day                                | 14.2 (1.2)       |            | 14.1 (1.1)                 |            |
| Counts per minute                                      | 362.9<br>(137.5) |            | 334.0 (111.9) <sup>∞</sup> |            |
| Minutes per day in different intensities               |                  |            |                            |            |
| Sedentary (cpm 0 – 99)                                 | 573.3 (77.3)     |            | 565.3 (63.2)               |            |
| Light (cpm 100 – 1951)                                 | 230.5 (58.8)     |            | 236.2 (48.4)               |            |
| Moderate (cpm 1952 – 5723)                             | 45.8 (20.6)      |            | 40.2 (17.7) <sup>∞</sup>   |            |
| Vigorous (cpm ≥ 5724)                                  | 3.7 (5.8)        |            | 2.9 (4.1) <sup>∞</sup>     |            |
| MVPA# (cpm ≥ 1952)                                     | 49.5 (23.4)      |            | 43.1 (19.6) <sup>∞</sup>   |            |
| Meeting MVPA guidelines per day                        |                  |            |                            |            |
| 0 – 29 minutes                                         | 35 (20.5)        |            | 69 (26.5)                  |            |
| 30 – 59 minutes                                        | 90 (52.6)        |            | 146 (56.2)                 |            |
| ≥ 60 minutes                                           | 46 (26.9)        |            | 45 (17.3) <sup>§</sup>     |            |

◇: Values are means with standard deviation (SD) or n (prevalence in percentages). BMI: body weight in kg/height in meters<sup>2</sup>, FMI: fat mass in kg/height in meters<sup>2</sup>, LMI: lean mass in kg/height in meters<sup>2</sup>, aLMI: appendicular lean mass in kg/height in meters<sup>2</sup>. Data on physical activity in FF2 was not available.

\*: Significantly different from baseline measurement ( $p < 0.05$ )

<sup>∞</sup>: Significantly different from boys (mean).

#: MVPA: moderate to vigorous physical activity, using cut-offs suggested by Freedson.[19]

§: significantly different linear trend from boys ( $p < 0.05$ )

Table 2 displays the association between minutes spent in sedentary activity at baseline and changes in body composition between baseline and follow-up. There was no association between sedentary activity and changes in BMI, waist

1 circumference and FMI in neither boys nor girls. In girls, but not in boys, more  
 2 minutes spent in sedentary activity at baseline was associated with lower LMI ( $p <$   
 3  $0.01$ ) and aLMI ( $p = 0.02$ ). Adjustment for covariates and MVPA slightly attenuated  
 4 the association with aLMI ( $p = 0.05$ ).

Table 2. Association between minutes per day spent in sedentary activity (CPM 0 – 99) at baseline and changes in body composition#.

|                              | Boys (n = 171) |             |         | Girls (n = 260) |              |         |
|------------------------------|----------------|-------------|---------|-----------------|--------------|---------|
|                              | Beta           | 95% CI      | p value | Beta            | 95% CI       | p value |
| $\Delta$ BMI                 |                |             |         |                 |              |         |
| Model 1                      | -0.02          | -0.13, 0.09 | 0.76    | -0.05           | -0.15, 0.05  | 0.33    |
| Model 2                      | -0.02          | -0.17, 0.12 | 0.75    | -0.11           | -0.24, 0.03  | 0.12    |
| Model 3                      | 0.01           | -0.17, 0.20 | 0.88    | -0.11           | -0.27, 0.05  | 0.16    |
| $\Delta$ waist circumference |                |             |         |                 |              |         |
| Model 1                      | 0.17           | -0.21, 0.56 | 0.37    | -0.01           | -0.41, 0.40  | 0.96    |
| Model 2                      | 0.27           | -0.24, 0.78 | 0.30    | -0.33           | -0.87, 0.20  | 0.22    |
| Model 3                      | 0.42           | -0.23, 1.07 | 0.20    | -0.44           | -1.06, 0.18  | 0.17    |
| $\Delta$ FMI                 |                |             |         |                 |              |         |
| Model 1                      | 0.00           | -0.10, 0.10 | 0.99    | -0.01           | -0.11, 0.08  | 0.83    |
| Model 2                      | -0.02          | -0.16, 0.11 | 0.74    | -0.06           | -0.18, 0.07  | 0.36    |
| Model 3                      | 0.00           | -0.17, 0.17 | 0.98    | -0.05           | -0.20, 0.09  | 0.48    |
| $\Delta$ LMI                 |                |             |         |                 |              |         |
| Model 1                      | 0.00           | -0.05, 0.05 | 0.88    | -0.06           | -0.09, -0.02 | <0.01   |
| Model 2                      | 0.01           | -0.06, 0.07 | 0.77    | -0.07           | -0.12, -0.02 | <0.01   |

|               |      |             |      |       |                  |       |
|---------------|------|-------------|------|-------|------------------|-------|
| Model 3       | 0.02 | -0.06, 0.10 | 0.63 | -0.08 | -0.13, -<br>0.03 | <0.01 |
| $\Delta$ aLMI |      |             |      |       |                  |       |
| Model 1       | 0.00 | -0.03, 0.03 | 0.84 | -0.02 | -0.04, -<br>0.00 | 0.02  |
| Model 2       | 0.00 | -0.03, 0.04 | 0.81 | -0.03 | -0.05, -<br>0.01 | 0.02  |
| Model 3       | 0.01 | -0.04, 0.05 | 0.71 | -0.03 | -0.06, 0.00      | 0.05  |

#: The table displays the association between minutes spent in sedentary activity and difference in BMI (kg/m<sup>2</sup>), waist circumference, FMI (fat mass in kg/m<sup>2</sup>), LMI (lean mass in kg/m<sup>2</sup>) and aLMI (appendicular lean mass in kg/m<sup>2</sup>) between Fit Futures 1 (2010-2011) and Fit Futures 2 (2012-2013). The models give the beta coefficient for 30 minutes increase in sedentary activity. All models were adjusted for baseline values of the body composition parameter. In model 2 also adjusted for time between measurements and baseline values of screen time on weekdays, study specialisation, age in half-years, regularity of eating breakfast and device wear time. In Model 3 adjusted also for minutes spent in Moderate-to-vigorous physical activity (CPM  $\geq$  1952).

Table 3 displays the association between minutes spent in light activity at baseline and changes in body composition between baseline and follow-up. There was no association between the exposure and either body composition parameter in boys. In girls there was some evidence to suggest an association with change in waist circumference (p = 0.05), but the association was attenuated after adjustments (p = 0.17). More minutes spent in light physical activity was associated with higher LMI (p < 0.01 (Models 2 and 3)) and aLMI (p = 0.04 (Model 2) and 0.05 (Model 3)).

Table 3. Association between minutes per day spent in light activity (CPM 100 – 1951) at baseline and changes in body composition#.

|                              | Boys (n = 171) |             |         | Girls (n = 260) |             |         |
|------------------------------|----------------|-------------|---------|-----------------|-------------|---------|
|                              | Beta           | 95% CI      | p value | Beta            | 95% CI      | p value |
| $\Delta$ BMI                 |                |             |         |                 |             |         |
| Model 1                      | 0.04           | -0.11, 0.18 | 0.60    | 0.05            | -0.09, 0.19 | 0.47    |
| Model 2                      | 0.01           | -0.17, 0.18 | 0.93    | 0.12            | -0.04, 0.27 | 0.13    |
| Model 3                      | -0.01          | -0.20, 0.17 | 0.88    | 0.11            | -0.05, 0.27 | 0.16    |
| $\Delta$ waist circumference |                |             |         |                 |             |         |
| Model 1                      | -0.11          | -0.62, 0.40 | 0.68    | 0.54            | 0.01, 1.07  | 0.05    |
| Model 2                      | -0.38          | -1.00, 0.23 | 0.22    | 0.43            | -0.19, 1.05 | 0.17    |
| Model 3                      | -0.42          | -1.07, 0.23 | 0.20    | 0.44            | -0.19, 1.06 | 0.17    |
| $\Delta$ FMI                 |                |             |         |                 |             |         |
| Model 1                      | 0.03           | -0.10, 0.16 | 0.67    | 0.02            | -0.10, 0.15 | 0.71    |
| Model 2                      | 0.01           | -0.15, 0.18 | 0.87    | 0.06            | -0.09, 0.20 | 0.43    |
| Model 3                      | -0.00          | -0.17, 0.17 | 0.98    | 0.05            | -0.09, 0.20 | 0.49    |
| $\Delta$ LMI                 |                |             |         |                 |             |         |
| Model 1                      | -0.01          | -0.07, 0.06 | 0.84    | 0.04            | -0.01, 0.09 | 0.08    |
| Model 2                      | -0.02          | -0.09, 0.06 | 0.67    | 0.08            | 0.03, 0.13  | <0.01   |

|  |               |       |             |      |      |             |       |
|--|---------------|-------|-------------|------|------|-------------|-------|
|  | Model 3       | -0.02 | -0.10, 0.06 | 0.63 | 0.08 | 0.03, 0.13  | <0.01 |
|  | $\Delta$ aLMI |       |             |      |      |             |       |
|  | Model 1       | 0.00  | -0.03, 0.04 | 0.87 | 0.02 | -0.01, 0.04 | 0.16  |
|  | Model 2       | -0.01 | -0.05, 0.04 | 0.73 | 0.03 | 0.00, 0.06  | 0.04  |
|  | Model 3       | -0.01 | -0.05, 0.04 | 0.70 | 0.03 | -0.00, 0.06 | 0.05  |

#: The table displays the association between minutes spent in light activity and difference in BMI (kg/m<sup>2</sup>), waist circumference, FMI (fat mass in kg/m<sup>2</sup>), LMI (lean mass in kg/m<sup>2</sup>) and aLMI (appendicular lean mass in kg/m<sup>2</sup>) between Fit Futures 1 (2010-2011) and Fit Futures 2 (2012-2013). The models give the beta coefficient for 30 minutes increase in light activity. All models were adjusted for baseline values of the body composition parameter. In model 2 also adjusted for time between measurements and baseline values of screen time on weekdays, study specialisation, age in half-years, regularity of eating breakfast and device wear time. In Model 3 adjusted also for minutes spent in Moderate-to-vigorous physical activity (CPM  $\geq$  1952).

Table 4 displays the association between minutes in MVPA at baseline and changes in body composition between baseline and follow-up. There was no association between time spent in MVPA and changes in either measure of body composition for either sex.

Table 4. Association between minutes per day spent in MVPA (CPM  $\geq$  1952) at baseline and changes in body composition#.

|  | Boys (n = 171) |        |         | Girls (n = 260) |        |         |
|--|----------------|--------|---------|-----------------|--------|---------|
|  | Beta           | 95% CI | p value | Beta            | 95% CI | p value |
|  |                |        |         |                 |        |         |

|                              |       |             |      |       |             |      |  |
|------------------------------|-------|-------------|------|-------|-------------|------|--|
| $\Delta$ BMI                 |       |             |      |       |             |      |  |
| Model 1                      | 0.11  | -0.07, 0.30 | 0.22 | -0.00 | -0.17, 0.16 | 0.97 |  |
| Model 2                      | 0.08  | -0.13, 0.29 | 0.47 | 0.07  | -0.11, 0.25 | 0.47 |  |
| $\Delta$ waist circumference |       |             |      |       |             |      |  |
| Model 1                      | 0.25  | -0.39, 0.89 | 0.44 | -0.03 | -0.68, 0.63 | 0.94 |  |
| Model 2                      | -0.02 | -0.75, 0.71 | 0.95 | 0.02  | -0.70, 0.74 | 0.96 |  |
| $\Delta$ FMI                 |       |             |      |       |             |      |  |
| Model 1                      | 0.02  | -0.15, 0.19 | 0.83 | -0.01 | -0.17, 0.14 | 0.86 |  |
| Model 2                      | 0.06  | -0.14, 0.25 | 0.57 | 0.05  | -0.12, 0.22 | 0.54 |  |
| $\Delta$ LMI                 |       |             |      |       |             |      |  |
| Model 1                      | 0.07  | -0.02, 0.15 | 0.11 | 0.03  | -0.03, 0.09 | 0.33 |  |
| Model 2                      | 0.01  | -0.08, 0.10 | 0.86 | 0.02  | -0.04, 0.09 | 0.44 |  |
| $\Delta$ aLMI                |       |             |      |       |             |      |  |
| Model 1                      | 0.03  | -0.02, 0.08 | 0.19 | 0.02  | -0.01, 0.05 | 0.13 |  |
| Model 2                      | 0.00  | -0.05, 0.05 | 0.92 | 0.02  | -0.01, 0.05 | 0.18 |  |

#: The table displays the association between minutes spent in moderate-to-vigorous physical activity (MVPA) and difference in BMI ( $\text{kg}/\text{m}^2$ ), waist circumference, FMI (fat mass in  $\text{kg}/\text{m}^2$ ), LMI (lean mass in  $\text{kg}/\text{m}^2$ ) and aLMI (appendicular lean mass in  $\text{kg}/\text{m}^2$ ) between Fit Futures 1 (2010-2011) and Fit Futures 2 (2012-2013). The models give the beta coefficient for 15 minutes increase in MVPA. Both models were adjusted for baseline values of the body composition parameter. In model 2 also adjusted for time between measurements and baseline values of screen time on weekdays, study specialisation, age in half-years, regularity of eating breakfast and device wear time.



1  
2  
3  
4 1  
5  
6  
7  
8 2 Appendix Table 1 shows the descriptive characteristics of the participants with valid  
9  
10  
11 3 baseline measurements of physical activity and adjustment variables, but who were  
12  
13  
14 4 lost to follow-up. Both boys and girls lost to follow-up had significantly higher mean  
15  
16  
17  
18 5 BMI, waist circumference, fat mass and FMI at baseline, as well as significantly less  
19  
20  
21  
22 6 minutes per day spent in light- and moderate-to-vigorous (girls only) physical activity.  
23  
24  
25 7 In Appendix Tables 2-4, we present sub-analyses restricted to those with complete  
26  
27  
28 8 data on pubertal development, confirming the results displayed in Tables 2-4 also  
29  
30  
31  
32 9 after adjustments for pubertal development. Overall, adjustment for pubertal  
33  
34  
35  
36 10 development had no substantial impact on an association between sedentary, light  
37  
38  
39 11 and moderate-to-vigorous physical activity and changes in body composition for  
40  
41  
42  
43 12 either sex in complete case analyses. However, the association between minutes  
44  
45  
46 13 spent in sedentary activity- and light activity and changes in appendicular lean mass  
47  
48  
49 14 index was no longer significant for girls in Model 3. The point estimates did not differ  
50  
51  
52  
53 15 from those from analyses without adjustments for pubertal development, however.  
54  
55  
56

## 57 Discussion

58  
59  
60

1  
2  
3  
4 1 In this longitudinal population-based study of Norwegian adolescents there were in  
5  
6  
7 2 both boys and girls no associations between objectively measured physical activity at  
8  
9  
10 3 baseline and two-year changes in BMI, waist circumference and FMI. Both boys and  
11  
12  
13  
14 4 girls had statistically significant increases in the measures of body composition  
15  
16  
17 5 (except lean mass index and appendicular lean mass in girls). Objectively measured  
18  
19  
20  
21 6 physical activity did not predict changes in boys. In girls there was a significant  
22  
23  
24 7 association between minutes spent in sedentary- and light physical activity and  
25  
26  
27  
28 8 changes in indices of lean mass.

29  
30  
31  
32 9 Although the magnitude of change differed, both sexes experienced increases in  
33  
34  
35  
36 10 measures of body composition. In boys, FMI increased by 0.7 units (+ 16.7%),  
37  
38  
39 11 whereas LMI increased by 0.4 units (+ 2.3 %) from baseline. Similar relative changes  
40  
41  
42 12 were observed in girls, (FMI +8.2 %) and (LMI + 0.7%), indicating that FMI increases  
43  
44  
45  
46 13 relatively more than LMI during late adolescence. We observed statistically significant  
47  
48  
49 14 differences in minutes spent in moderate ( $p < 0.01$ ) and vigorous ( $p = 0.04$ ) intensity  
50  
51  
52  
53 15 between boys and girls, but time spent in other intensity levels did not differ.

54  
55  
56 16 Differences in physical activity by sex is consistent with previous research.[22, 23]

57  
58  
59 17 Differences in changes in body composition by sex are biologically determined during

1 adolescence, with sex hormones resulting in fat mass accrual in girls and lean mass  
2 accrual in boys.[24, 25] The observation that sedentary- and light activity predicted  
3 changes in indices of lean mass in girls, but not boys, may be explained by these  
4 expected biological differences. Physical activity may have somewhat greater  
5 potential to influence lean mass accrual in girls than in boys during this period, as fat-  
6 free mass is relatively stable in girls in late adolescence whereas it increases up to  
7 18 years of age in boys.[26]

8 In the present study sedentary- and light activity had opposing effects on lean mass  
9 in girls. In a study using iso-temporal substitution models, positive prospective effects  
10 on fat mass was found when substituting 30 minutes of sedentary activity with MVPA,  
11 but not when substituted with light activity.[27] It is reasonable that sedentary- and  
12 light physical activity have opposing effects on lean mass.[28] In the present study  
13 sedentary- and light activity was inversely correlated ( $r = - 0.39$ ), but minutes spent in  
14 different intensity levels are not directly a function of each other as wear time in the  
15 participants varies between individuals. Based on wear time inclusion criteria, the  
16 theoretical time span for wear time lies between 10 and 24 hours. Thus, minutes  
17 spent in sedentary activity may not be deduced from the sum of minutes spent in

1  
2  
3  
4 1 other intensities and vice versa, but it is plausible that higher wear time results in  
5  
6  
7 2 more sedentary time. This was evident in an exploratory analyses on the same  
8  
9  
10 3 cohort (not included in the present study), where higher wear time was significantly  
11  
12  
13  
14 4 associated with more sedentary activity and less light activity ( $p < 0.01$ ). Adjusting for  
15  
16  
17 5 wear time (Models 2) did not change the associations substantially for sedentary  
18  
19  
20  
21 6 activity (Table 2), but had some effect on the associations with light physical activity  
22  
23  
24 7 (Table 3). Because of the inverse relationship between minutes spent sedentary and  
25  
26  
27  
28 8 in light activity, it is not possible to determine whether it is sedentary time or light  
29  
30  
31 9 activity-time that is associated with change in LMI. The practical consequences are  
32  
33  
34  
35 10 nevertheless that being active increases lean mass in girls.

36  
37  
38  
39 11 When interpreting results, we must acknowledge the limitations of DXA in the  
40  
41  
42  
43 12 estimation of lean mass, which can be affected by both biological factors and  
44  
45  
46 13 measurement error.[29] Because the relative increase in lean mass was small, only  
47  
48  
49  
50 14 slight differences in for instance individual hydration status at the two time-points may  
51  
52  
53 15 influence estimates and thus the association.

1  
2  
3  
4 1 There was no associations between objectively measured physical activity and  
5  
6  
7 2 change in BMI, waist circumference and FMI for either sex. It may be that the  
8  
9  
10 3 negative effects of less physical activity have not yet had time to manifest themselves  
11  
12  
13  
14 4 in a population still undergoing physiological changes as a result of natural growth,  
15  
16  
17 5 especially considering the relatively short 2-year follow-up. Our results are in line with  
18  
19  
20  
21 6 a systematic review suggesting that objectively measured PA is not an important  
22  
23  
24 7 predictor of change in adiposity in children, adolescents and adults.[12] In contrast,  
25  
26  
27  
28 8 another systematic review found a protective effect of physical activity on adiposity in  
29  
30  
31 9 adolescents.[10] There were however several methodological weaknesses in the  
32  
33  
34  
35 10 studies included in this review, particularly regarding the validity of the measurement  
36  
37  
38  
39 11 of both physical activity and body composition. In contrast, our study employed  
40  
41  
42 12 robust measures of both these exposures- and outcomes, a combination which is  
43  
44  
45 13 lacking in much past research on the association between the two.[10-12]  
46  
47  
48  
49 14 In adolescents, physical activity is influenced by friends, family and other social  
50  
51  
52  
53 15 support,[30] and is less stable than in adults.[31-33] Follow-up data on objectively  
54  
55  
56  
57 16 measured physical activity was not available in the present study, but some evidence  
58  
59  
60 17 suggests that the decline in physical activity is steeper prior to the onset of

1  
2  
3  
4 1 adolescence.[34] Reductions in level of physical activity during the transition from  
5  
6  
7 2 adolescence to young adulthood nevertheless often occur.[35] Prior observations  
8  
9  
10 3 from the same cohort showed that change in self-reported physical activity between  
11  
12  
13  
14 4 baseline and follow-up was a stronger predictor of change in body composition than  
15  
16  
17 5 self-reported baseline physical activity.[36] Other studies have suggested that  
18  
19  
20  
21 6 change in activity during follow-up might obscure an association with body  
22  
23  
24 7 composition.[37, 38] In a sub-analyses, one of four in both the highest and lowest  
25  
26  
27  
28 8 categories of MVPA at baseline reported decreased (high MVPA at baseline) and  
29  
30  
31 9 increased (low MVPA at baseline) self-reported physical activity at follow up, thus  
32  
33  
34  
35 10 indicating that physical activity in adolescents is fluctuant. These two observations,  
36  
37  
38  
39 11 assuming that measurement of both MVPA and self-reported hours per week of  
40  
41  
42 12 physical activity are representative of actual physical activity behaviour at the time,  
43  
44  
45 13 work in opposing directions with regard to the effect of physical activity on changes in  
46  
47  
48  
49 14 adiposity. This phenomenon is known as regression dilution bias and may flatten the  
50  
51  
52 15 regression slope and cause an underestimate of the actual association.[39] With an  
53  
54  
55  
56 16 annual decline in total physical activity of 7% in adolescents, researchers must  
57  
58  
59 17 consider the possibility that measured physical activity has a “best before-date”. It  
60

1  
2  
3  
4 1 remains questionable whether baseline measurements of a fluctuant behaviour such  
5  
6  
7 2 as physical activity is representative of actual habits during the period of follow-up. It  
8  
9  
10 3 may be that the measurement represents current, but not future (or even prior)  
11  
12  
13  
14 4 habits.[12, 40] This has implications for longitudinal studies of the relationship  
15  
16  
17 5 between physical activity and body composition.[38]  
18  
19  
20  
21  
22 6  
23  
24  
25  
26 7

### 7 Strengths and limitations

8 The primary strength of this study are objective measures of both physical activity  
9  
10 and body composition parameters, and the inclusion of tissue-specific measures of  
11  
12 body composition. Some limitations have to be considered. As the Fit Futures study  
13  
14 did not include a validated food frequency questionnaire or similar instrument for  
15  
16 nutritional assessment, we were not able to fully adjust for the potential confounding  
17  
18 effects of nutrition and changes in food habits of adolescents on changes in body  
19  
20 composition. Accelerometer-measured physical activity has limitations. A hip worn  
21  
22 accelerometer such as the ActiGraph GT3X is not able to correctly measure cycling  
23  
24 and swimming.[41] Furthermore, accelerometers are dependent on user-compliance,  
25  
26  
27  
28  
29  
30  
31  
32  
33  
34  
35  
36  
37  
38  
39  
40  
41  
42  
43  
44  
45  
46  
47  
48  
49  
50  
51  
52  
53  
54  
55  
56  
57  
58  
59  
60

1 and non-wear time therefore affects the amount of activity which is actually  
2 measured. Subjective judgement determines data management and analyses, e.g.  
3 the decision to exclude participants with wear time < 10 hours and < 4 consecutive  
4 days, is a trade-off between quality of data and the number of participants with valid  
5 data. We lacked complete data on physical activity and adjustment variables in 212  
6 participants, but changes in BMI, waist circumference, FMI, LMI (except in girls,  $p =$   
7 0.04) and aLMI were not significantly different between those with- and without  
8 complete exposure data. Furthermore, of those with valid data concerning both  
9 physical activity and body composition parameters at baseline, close to 25% did not  
10 attend the follow up (Appendix Table 1). This group differed significantly from those  
11 included in the main analyses with respect to both physical activity and body  
12 composition parameters. The prospective associations between physical activity and  
13 changes in body composition parameters in this group ( $n = 133$ ) may be different  
14 from those observed in the group of participants included in the main analyses ( $n =$   
15 431), and the associations in all the 564 participants with valid baseline data may  
16 therefore be different from what we find in the main analyses. This is however not  
17 possible to determine given the lack of follow-up data.



1  
2  
3  
4 1 Although longitudinal observational studies are superior to cross-sectional studies to  
5  
6  
7 2 examine causation, they are also susceptible to directional bias, since participants  
8  
9  
10 3 may avoid physical activity because they are overweight, and not be overweight  
11  
12  
13  
14 4 because they are inactive.[42-44] Finally, as the participants were 16 years old, much  
15  
16  
17 5 may already have happened both to the level of physical activity and the different  
18  
19  
20  
21 6 measures of body composition prior to participation. In light of this, 2 years of follow-  
22  
23  
24 7 up may be a short time frame to determine the potential effects of physical activity on  
25  
26  
27  
28 8 changes in the different body composition parameters.  
29  
30  
31  
32  
33  
34  
35

## 36 **Conclusion**

37  
38  
39  
40 11 Objectively measured physical activity was not significantly associated with change in  
41  
42  
43  
44 12 objectively measured BMI, waist circumference or FMI after two years in this cohort  
45  
46  
47 13 of Norwegian adolescents. There was evidence to suggest that sedentary- and light  
48  
49  
50  
51 14 activity affected indices of lean mass in girls, but not boys.  
52  
53  
54  
55  
56  
57  
58  
59  
60

## 1 Acknowledgements

2  
3  
4  
5  
6  
7  
8 2 The authors thank the participants in the study, as well as the staff at the Clinical  
9  
10  
11 3 Research Unit at the University Hospital of North Norway for data collection and  
12  
13  
14 4 clinical measurements. We also thank the Fit Futures Steering Committee in both  
15  
16  
17  
18 5 studies.  
19  
20  
21

## 22 Footnotes

### 23 24 25 26 7 Contributors

27  
28  
29  
30 8 NAA wrote the draft of the manuscript, which was revised and edited by all authors  
31  
32  
33  
34 9 several times during the process. SB produced the accelerometer variables in close  
35  
36  
37  
38 10 collaboration with AH, who wrote the software which converted raw accelerometer  
39  
40  
41 11 data to variables. BKJ contributed to the statistical analyses, and BM specifically  
42  
43  
44  
45 12 contributed to the discussion of physical activity. NE and ASF were among the  
46  
47  
48 13 principal investigators in FF1 and FF2 and contributed significantly to the acquisition  
49  
50  
51 14 of data. SG formulated the research question and conceived the study. All authors  
52  
53  
54  
55 15 have substantially contributed to the study, and have read and approved the final  
56  
57  
58 16 manuscript.  
59  
60

1  
2  
3 1 Funding  
4  
5  
6

7 2 This particular manuscript has not received any specific funding.  
8  
9

10  
11 3 Competing interests  
12  
13

14  
15 4 The authors declare that they have no competing interests.  
16  
17

18  
19 5 Consent for publication  
20  
21

22  
23 6 Not applicable  
24  
25

26  
27 7 Ethics approval  
28  
29

30  
31 8 This study was approved by The Regional Committee of Medical and Health  
32  
33

34  
35 9 Research Ethics (2014/1666/REK nord).  
36  
37

38  
39 10 Data availability statement  
40  
41

42  
43 11 The data that support the findings of this study are available from UiT – The Arctic  
44  
45

46  
47 12 University of Norway. Restrictions apply to the availability of these data, which were  
48  
49

50  
51 13 used under license for the current study, and are thus not publicly available.  
52  
53  
54  
55  
56  
57  
58  
59  
60

## 1 References

1. World Health Organization. Global action plan on physical activity 2018–2030: more active people for a healthier world. Geneva 2018.
2. Lee IM, Shiroma EJ, Lobelo F, et al. Effect of physical inactivity on major non-communicable diseases worldwide: an analysis of burden of disease and life expectancy. *Lancet* 2012;380:219-29.
3. World Health Organization. Global Recommendations on Physical Activity for Health. WHO Guidelines. Geneva 2010.
4. Kolle E SJ, Hansen BH, Anderssen SA. [Fysisk aktivitet blant 6-, 9- og 15-åringer i Norge. Resultater fra en kartlegging i 2011]. The Norwegian Directorate of Health, Oslo, Norway. 2012.
5. Dumith SC, Gigante DP, Domingues MR, et al. Physical activity change during adolescence: a systematic review and a pooled analysis. *Int J Epidemiol.* 2011;40:685-98.
6. Collings PJ, Wijndaele K, Corder K, et al. Magnitude and determinants of change in objectively-measured physical activity, sedentary time and sleep duration from

- 1  
2  
3  
4 1 ages 15 to 17.5y in UK adolescents: the ROOTS study. *Int J Behav Nutr Phys Act.*  
5  
6  
7 2 2015;12:61.  
8  
9  
10 3 7. Crane J, Temple V. A systematic review of dropout from organized sport among  
11  
12  
13 4 children and youth. *Eur Phys Educ Rev.* 2015;21:114-31.  
14  
15  
16  
17 5 8. Ng M, Fleming T, Robinson M, et al. Global, regional, and national prevalence of  
18  
19  
20 6 overweight and obesity in children and adults during 1980-2013: a systematic  
21  
22  
23 7 analysis for the Global Burden of Disease Study 2013. *Lancet.* 2014;384:766-81.  
24  
25  
26  
27 8 9. NCD Risk Factor Collaboration (NCD-RisC). Worldwide trends in body-mass  
28  
29  
30 9 index, underweight, overweight, and obesity from 1975 to 2016: a pooled analysis of  
31  
32  
33 10 2416 population-based measurement studies in 128.9 million children, adolescents,  
34  
35  
36  
37 11 and adults. *Lancet.* 2017. doi:10.1016/S0140-6736(17)32129-3.  
38  
39  
40  
41 12 10. Reichert FF, Baptista Menezes AM, Wells JC, et al. Physical activity as a  
42  
43  
44 13 predictor of adolescent body fatness: a systematic review. *Sports Med.* 2009;39:279-  
45  
46  
47 14 94.  
48  
49  
50  
51 15 11. Jimenez-Pavon D, Kelly J, Reilly JJ. Associations between objectively measured  
52  
53  
54 16 habitual physical activity and adiposity in children and adolescents: Systematic  
55  
56  
57 17 review. *Int J Pediatr Obes.* 2010;5:3-18.  
58  
59  
60

- 1  
2  
3  
4 1 12. Wilks DC, Besson H, Lindroos AK, et al. Objectively measured physical activity  
5  
6  
7 2 and obesity prevention in children, adolescents and adults: a systematic review of  
8  
9  
10 3 prospective studies. *Obes Rev.* 2011;12:e119-29.  
11  
12  
13  
14 4 13. Dyrstad SM, Hansen BH, Holme IM, et al. Comparison of self-reported versus  
15  
16  
17 5 accelerometer-measured physical activity. *Med Sci Sports Exerc.* 2014;46:99-106.  
18  
19  
20  
21 6 14. Aars NA, Jacobsen BK, Furberg AS, et al. Self-reported physical activity during  
22  
23  
24 7 leisure time was favourably associated with body composition in Norwegian  
25  
26  
27 8 adolescents. *Acta Paediatr.* 2018. doi:10.1111/apa.14660.  
28  
29  
30  
31 9 15. Goulding A, Taylor RW, Grant AM, et al. Relationships of appendicular LMI and  
32  
33  
34 10 total body LMI to bone mass and physical activity levels in a birth cohort of New  
35  
36  
37 11 Zealand five-year olds. *Bone.* 2009;45:455-9.  
38  
39  
40  
41  
42 12 16. Bridge P, Pocock NA, Nguyen T, et al. Validation of longitudinal DXA changes in  
43  
44  
45 13 body composition from pre- to mid-adolescence using MRI as reference. *J Clin*  
46  
47  
48 14 *Densitom.* 2011;14:340-7.  
49  
50  
51  
52 15 17. Trost SG, Pate RR, Freedson PS, et al. Using objective physical activity  
53  
54  
55 16 measures with youth: how many days of monitoring are needed? *Med Sci Sports*  
56  
57  
58 17 *Exerc.* 2000;32:426-31.  
59  
60

- 1  
2  
3  
4 1 18. Hecht A, Ma S, Porszasz J, et al. Methodology for using long-term accelerometry  
5  
6  
7 2 monitoring to describe daily activity patterns in COPD. *COPD*. 2009;6:121-9.  
8  
9  
10 3 19. Freedson PS, Melanson E, Sirard J. Calibration of the Computer Science and  
11  
12  
13 4 Applications, Inc. accelerometer. *Med Sci Sports Exerc*. 1998;30:777-81.  
14  
15  
16  
17 5 20. Sasaki JE, John D, Freedson PS. Validation and comparison of ActiGraph activity  
18  
19  
20 6 monitors. *J Sci Med Sport*. 2011;14:411-6.  
21  
22  
23  
24 7 21. Cuzick J. A Wilcoxon-type test for trend. *Stat Med*. 1985;4:87-90.  
25  
26  
27  
28 8 22. Kolle E, Steene-Johannessen J, Andersen LB, et al. Objectively assessed  
29  
30  
31 9 physical activity and aerobic fitness in a population-based sample of Norwegian 9-  
32  
33  
34 10 and 15-year-olds. *Scand J Med Sci Sports*. 2010;20:e41-7.  
35  
36  
37  
38 11 23. Van Hecke L, Loyen A, Verloigne M, et al. Variation in population levels of  
39  
40  
41 12 physical activity in European children and adolescents according to cross-European  
42  
43  
44 13 studies: a systematic literature review within DEDIPAC. *Int J Behav Nutr Phys Act*.  
45  
46  
47 14 2016;13:70.  
48  
49  
50  
51  
52 15 24. Baxter-Jones AD, Eisenmann JC, Mirwald RL, et al. The influence of physical  
53  
54  
55 16 activity on lean mass accrual during adolescence: a longitudinal analysis. *J Appl*  
56  
57  
58 17 *Physiol (1985)*. 2008;105:734-41.  
59  
60

- 1  
2  
3  
4 1 25. Wohlfahrt-Veje C, Tinggaard J, Winther K, et al. Body fat throughout childhood in  
5  
6  
7 2 2647 healthy Danish children: agreement of BMI, waist circumference, skinfolds with  
8  
9  
10 3 dual X-ray absorptiometry. *Eur J Clin Nutr.* 2014;68:664-70.  
11  
12  
13  
14 4 26. Siervogel RM, Demerath EW, Schubert C, et al. Puberty and body composition.  
15  
16  
17 5 *Horm Res.* 2003;60:36-45.  
18  
19  
20  
21 6 27. Sardinha LB, Marques A, Minderico C, et al. Cross-sectional and prospective  
22  
23  
24 7 impact of reallocating sedentary time to physical activity on children's body  
25  
26  
27 8 composition. *Pediatr Obes.* 2017;12:373-9.  
28  
29  
30  
31 9 28. Kenney WL, Wilmore JH, Costill DL. Physiology of sport and exercise. Seventh  
32  
33  
34 10 edition. Champaign, IL: Human Kinetics; 2020.  
35  
36  
37  
38 11 29. Lohman TG, Milliken LA. ACSM's body composition assessment. Champaign, IL:  
39  
40  
41 12 Human Kinetics; 2020.  
42  
43  
44  
45 13 30. Mendonca G, Cheng LA, Melo EN, et al. Physical activity and social support in  
46  
47  
48 14 adolescents: a systematic review. *Health Educ Res.* 2014;29:822-39.  
49  
50  
51  
52 15 31. Telama R, Yang X. Decline of physical activity from youth to young adulthood in  
53  
54  
55 16 Finland. *Med Sci Sports Exerc.* 2000;32:1617-22.  
56  
57  
58  
59  
60



- 1  
2  
3  
4 1 32. Varma VR, Dey D, Leroux A, et al. Re-evaluating the effect of age on physical  
5  
6  
7 2 activity over the lifespan. *Prev Med.* 2017;101:102-8.  
8  
9  
10 3 33. Caspersen CJ, Pereira MA, Curran KM. Changes in physical activity patterns in  
11  
12  
13 4 the United States, by sex and cross-sectional age. *Med Sci Sports Exerc.*  
14  
15  
16  
17 5 2000;32:1601-9.  
18  
19  
20  
21 6 34. Farooq MA, Parkinson KN, Adamson AJ, et al. Timing of the decline in physical  
22  
23  
24 7 activity in childhood and adolescence: Gateshead Millennium Cohort Study. *Br J*  
25  
26  
27 8 *Sports Med.* 2018;52:1002-6..  
28  
29  
30  
31 9 35. Corder K, Winpenny E, Love R, et al. Change in physical activity from  
32  
33  
34 10 adolescence to early adulthood: a systematic review and meta-analysis of  
35  
36  
37 11 longitudinal cohort studies. *Br J Sports Med.* 2019;53:496-503.  
38  
39  
40  
41 12 36. Aars NA, Jacobsen BK, Morseth B, et al. Longitudinal changes in body  
42  
43  
44 13 composition and waist circumference by self-reported levels of physical activity in  
45  
46  
47 14 leisure among adolescents: the Tromsø study, Fit Futures. *BMC Sports Sci Med*  
48  
49  
50 15 *Rehabil.* 2019;11:37.  
51  
52  
53  
54  
55  
56  
57  
58  
59  
60

- 1  
2  
3  
4 1 37. O'Loughlin J, Gray-Donald K, Paradis G, et al. One- and two-year predictors of  
5  
6  
7 2 excess weight gain among elementary schoolchildren in multiethnic, low-income,  
8  
9  
10 3 inner-city neighborhoods. *Am J Epidemiol.* 2000;152:739-46.  
11  
12  
13  
14 4 38. Collings PJ, Wijndaele K, Corder K, et al. Objectively measured physical activity  
15  
16  
17 5 and longitudinal changes in adolescent body fatness: an observational cohort study.  
18  
19  
20 6 *Pediatr Obes.* 2016;11:107-14.  
21  
22  
23  
24 7 39. Hutcheon JA, Chiolerio A, Hanley JA. Random measurement error and regression  
25  
26  
27 8 dilution bias. *BMJ.* 2010;340:c2289.  
28  
29  
30  
31 9 40. Kettaneh A, Oppert JM, Heude B, et al. Changes in physical activity explain  
32  
33  
34 10 paradoxical relationship between baseline physical activity and adiposity changes in  
35  
36  
37 11 adolescent girls: the FLVS II study. *Int J Obes (Lond).* 2005;29:586-93.  
38  
39  
40  
41 12 41. Herman Hansen B, Bortnes I, Hildebrand M, et al. Validity of the ActiGraph GT1M  
42  
43  
44 13 during walking and cycling. *J Sports Sci.* 2014;32:510-6.  
45  
46  
47  
48 14 42. van Sluijs EM, Sharp SJ, Ambrosini GL, et al. The independent prospective  
49  
50  
51 15 associations of activity intensity and dietary energy density with adiposity in young  
52  
53  
54 16 adolescents. *Br J Nutr.* 2016;115:921-9.  
55  
56  
57  
58  
59  
60

- 1  
2  
3  
4 1 43. Hjorth MF, Chaput JP, Ritz C, et al. Fatness predicts decreased physical activity  
5  
6  
7 2 and increased sedentary time, but not vice versa: support from a longitudinal study in  
8  
9  
10 3 8- to 11-year-old children. *Int J Obes (Lond)*. 2014;38:959-65.  
11  
12  
13  
14 4 44. Jago R, Salway RE, Ness AR, et al. Associations between physical activity and  
15  
16  
17 5 asthma, eczema and obesity in children aged 12-16: an observational cohort study.  
18  
19  
20  
21 6 *BMJ Open*. 2019;9:e024858. doi:10.1136/bmjopen-2018-024858.  
22  
23  
24  
25 7  
26  
27  
28  
29  
30  
31  
32  
33  
34  
35  
36  
37  
38  
39  
40  
41  
42  
43  
44  
45  
46  
47  
48  
49  
50  
51  
52  
53  
54  
55  
56  
57  
58  
59  
60

## Supplementary file

Appendix Table 1. Descriptive characteristics of participants lost to follow-up (n = 133), with p-value for difference from sample in Table 1\*.

|                                                        | Boys (n = 79) | P for difference | Girls (n = 54) | P for difference |
|--------------------------------------------------------|---------------|------------------|----------------|------------------|
| Age (years)                                            | 16.1 (0.4)    | 0.26             | 16.1 (0.4)     | 0.42             |
| Height (cm)                                            | 176.7 (13.8)  | 0.31             | 164.5 (5.9)    | 0.18             |
| Body weight (kg)                                       | 73.3 (18.0)   | 0.01             | 63.5 (1.9)     | 0.06             |
| Body mass index (BMI kg/m <sup>2</sup> )               | 23.4 (5.2)    | 0.01             | 23.4 (4.4)     | 0.02             |
| Waist circumference (cm)                               | 85.1 (13.9)   | <0.01            | 80.0 (12.4)    | 0.02             |
| Total Body Fat Mass (kg)                               | 17.6 (12.8)   | <0.01            | 22.8 (10.3)    | 0.01             |
| Fat Mass Index (FMI kg/m <sup>2</sup> )                | 5.6 (4.0)     | <0.01            | 8.4 (3.5)      | 0.01             |
| Total Body Lean Mass (kg)                              | 53.9 (7.8)    | 0.46             | 38.6 (4.6)     | 0.33             |
| Lean Mass Index (LMI kg/m <sup>2</sup> )               | 17.2 (1.9)    | 0.43             | 14.2 (1.4)     | 0.42             |
| Appendicular Lean Mass (kg)                            | 25.3 (4.1)    | 0.49             | 17.4 (2.5)     | 0.48             |
| Appendicular Lean Mass Index (aLMI kg/m <sup>2</sup> ) | 8.1 (1.0)     | 0.41             | 6.4 (0.76)     | 0.29             |
| Accelerometer variables                                |               |                  |                |                  |
| Wear time per valid day                                | 14.3 (1.2)    | 0.26             | 13.7 (1.0)     | <0.01            |
| Counts per minute                                      | 338.4 (112.1) | 0.08             | 300.5 (121.5)  | 0.03             |
| Minutes per day in different intensities               |               |                  |                |                  |
| Sedentary (cpm 0 – 99)                                 | 570.1 (82.6)  | 0.38             | 562.6 (68.9)   | 0.39             |
| Light (cpm 100 – 1951)                                 | 244.3 (64.7)  | 0.05             | 223.4 (46.3)   | 0.04             |
| Moderate (cpm 1952 – 5723)                             | 42.9 (19.6)   | 0.15             | 33.0 (17.6)    | <0.01            |
| Vigorous (cpm ≥ 5724)                                  | 2.3 (2.9)     | 0.03             | 2.7 (5.1)      | 0.40             |
| MVPA <sup>#</sup> (cpm ≥ 1952)                         | 45.2 (21.0)   | 0.08             | 35.6 (20.0)    | 0.01             |
| Meeting MVPA guidelines per day                        |               |                  |                |                  |
| 0 – 29 minutes                                         | 21 (26.6)     |                  | 24 (44.4)      |                  |
| 30 – 59 minutes                                        | 41 (51.9)     |                  | 23 (42.6)      |                  |
| ≥ 60 minutes                                           | 17 (21.5)     |                  | 7 (13.0)*      |                  |

\*: Statistically significantly different linear trend from sample included in manuscript (Table 1).

Appendix Table 2. Association between minutes per day spent in sedentary activity (CPM 0 – 99) at baseline and changes in body composition, adjusted for puberty<sup>#</sup>.

|                              | Boys (n = 143) |             |         | Girls (n = 258) |              |         |
|------------------------------|----------------|-------------|---------|-----------------|--------------|---------|
|                              | Beta           | 95% CI      | p value | Beta            | 95% CI       | p value |
| $\Delta$ BMI                 |                |             |         |                 |              |         |
| Model 1                      | -0.02          | -0.14, 0.09 | 0.70    | -0.05           | -0.15, 0.05  | 0.32    |
| Model 2                      | -0.01          | -0.17, 0.14 | 0.85    | -0.11           | -0.24, 0.03  | 0.12    |
| Model 3                      | 0.03           | -0.17, 0.23 | 0.76    | -0.11           | -0.27, 0.05  | 0.19    |
| $\Delta$ waist circumference |                |             |         |                 |              |         |
| Model 1                      | 0.12           | -0.27, 0.51 | 0.55    | -0.01           | -0.42, 0.39  | 0.95    |
| Model 2                      | 0.24           | -0.28, 0.77 | 0.36    | -0.38           | -0.91, 0.15  | 0.16    |
| Model 3                      | 0.37           | -0.32, 1.06 | 0.29    | -0.52           | -1.14, 0.10  | 0.10    |
| $\Delta$ FMI                 |                |             |         |                 |              |         |
| Model 1                      | -0.01          | -0.12, 0.09 | 0.84    | -0.01           | -0.11, 0.08  | 0.81    |
| Model 2                      | -0.01          | -0.15, 0.13 | 0.85    | -0.06           | -0.18, 0.07  | 0.35    |
| Model 3                      | 0.01           | -0.17, 0.20 | 0.90    | -0.05           | -0.20, 0.10  | 0.49    |
| $\Delta$ LMI                 |                |             |         |                 |              |         |
| Model 1                      | 0.00           | -0.05, 0.06 | 0.90    | -0.06           | -0.09, -0.02 | < 0.01  |
| Model 2                      | 0.01           | -0.07, 0.08 | 0.89    | -0.07           | -0.12, -0.02 | < 0.01  |
| Model 3                      | 0.02           | -0.08, 0.11 | 0.74    | -0.08           | -0.13, -0.02 | < 0.01  |
| $\Delta$ aLMI                |                |             |         |                 |              |         |
| Model 1                      | -0.00          | -0.03, 0.03 | 0.91    | -0.02           | -0.04, -0.00 | 0.02    |
| Model 2                      | 0.00           | -0.04, 0.04 | 0.92    | -0.03           | -0.05, -0.00 | 0.02    |
| Model 3                      | 0.01           | -0.04, 0.07 | 0.59    | -0.03           | -0.06, 0.00  | 0.06    |

#: The table displays the association between minutes spent in sedentary activity and difference in BMI ( $\text{kg}/\text{m}^2$ ), waist circumference, FMI (fat mass in  $\text{kg}/\text{m}^2$ ), LMI (lean mass in  $\text{kg}/\text{m}^2$ ) and aLMI (appendicular lean mass in  $\text{kg}/\text{m}^2$ ) between Fit Futures 1 (2010-2011) and Fit Futures 2 (2012-2013). The models give the beta coefficient for 30 minutes increase in sedentary activity. All models were adjusted for baseline values of the outcome. In model 2 also adjusted for time between measurements and baseline values of pubertal development (pds (boys) and age at menarche (girls)), screen time on weekdays, study specialisation, age in half-years, regularity of eating breakfast and device wear time. In Model 3 adjusted also for minutes spent in Moderate-to-vigorous physical activity ( $\text{CPM} \geq 1952$ ).

Appendix Table 3. Association between minutes per day spent in light activity (CPM 100 – 1951) at baseline and changes in body composition, adjusted for puberty<sup>#</sup>.

|                              | Boys (n = 143) |             |         | Girls (n = 258) |             |         |
|------------------------------|----------------|-------------|---------|-----------------|-------------|---------|
|                              | Beta           | 95% CI      | p value | Beta            | 95% CI      | p value |
| <b>Δ BMI</b>                 |                |             |         |                 |             |         |
| Model 1                      | 0.05           | -0.10, 0.20 | 0.53    | 0.04            | -0.09, 0.18 | 0.54    |
| Model 2                      | -0.00          | -0.19, 0.18 | 0.97    | 0.11            | -0.04, 0.27 | 0.15    |
| Model 3                      | -0.03          | -0.23, 0.17 | 0.76    | 0.11            | -0.05, 0.27 | 0.19    |
| <b>Δ waist circumference</b> |                |             |         |                 |             |         |
| Model 1                      | -0.01          | -0.53, 0.51 | 0.97    | 0.53            | -0.00, 1.07 | 0.05    |
| Model 2                      | -0.34          | -0.98, 0.30 | 0.30    | 0.50            | -0.11, 1.11 | 0.11    |
| Model 3                      | -0.37          | -1.06, 0.32 | 0.29    | 0.51            | -0.11, 1.13 | 0.10    |
| <b>Δ FMI</b>                 |                |             |         |                 |             |         |
| Model 1                      | 0.05           | -0.09, 0.18 | 0.51    | 0.02            | -0.11, 0.14 | 0.78    |
| Model 2                      | 0.00           | -0.17, 0.18 | 0.97    | 0.06            | -0.09, 0.20 | 0.43    |
| Model 3                      | -0.01          | -0.20, 0.17 | 0.90    | 0.05            | -0.10, 0.20 | 0.49    |
| <b>Δ LMI</b>                 |                |             |         |                 |             |         |
| Model 1                      | -0.01          | -0.08, 0.06 | 0.84    | 0.04            | -0.01, 0.09 | 0.08    |
| Model 2                      | -0.01          | -0.10, 0.07 | 0.80    | 0.08            | 0.02, 0.13  | < 0.01  |
| Model 3                      | -0.02          | -0.11, 0.07 | 0.74    | 0.08            | 0.02, 0.13  | < 0.01  |
| <b>Δ aLMI</b>                |                |             |         |                 |             |         |
| Model 1                      | 0.00           | -0.04, 0.04 | 0.93    | 0.02            | -0.01, 0.04 | 0.17    |
| Model 2                      | -0.01          | -0.06, 0.04 | 0.73    | 0.03            | 0.00, 0.06  | 0.04    |
| Model 3                      | -0.01          | -0.07, 0.04 | 0.59    | 0.03            | -0.00, 0.06 | 0.06    |

<sup>#</sup>: The table displays the association between minutes spent in light activity and difference in BMI (kg/m<sup>2</sup>), waist circumference, FMI (fat mass in kg/m<sup>2</sup>), LMI (lean mass in kg/m<sup>2</sup>) and aLMI (appendicular lean mass in kg/m<sup>2</sup>) between Fit Futures 1 (2010-2011) and Fit Futures 2 (2012-2013). The models give the beta coefficient for 30 minutes increase in light activity. All models were adjusted for baseline values of the outcome. In model 2 also adjusted for time between measurements and baseline values of pubertal development (pds (boys) and age at menarche (girls)), screen time on weekdays, study specialisation, age in half-years, regularity of eating breakfast and device wear time. In Model 3 adjusted also for minutes spent in Moderate-to-vigorous physical activity (CPM ≥ 1952).

Appendix Table 4. Association between minutes per day spent in MVPA (CPM  $\geq$  1952) at baseline and changes in body composition, adjusted for puberty<sup>#</sup>.

|                              | Boys (n = 143) |             |         | Girls (n = 258) |             |         |
|------------------------------|----------------|-------------|---------|-----------------|-------------|---------|
|                              | Beta           | 95% CI      | p value | Beta            | 95% CI      | p value |
| $\Delta$ BMI                 |                |             |         |                 |             |         |
| Model 1                      | 0.11           | -0.08, 0.31 | 0.24    | -0.00           | -0.17, 0.16 | 0.97    |
| Model 2                      | 0.07           | -0.15, 0.29 | 0.51    | 0.07            | -0.11, 0.25 | 0.43    |
| $\Delta$ waist circumference |                |             |         |                 |             |         |
| Model 1                      | 0.28           | -0.38, 0.95 | 0.40    | -0.02           | -0.68, 0.64 | 0.95    |
| Model 2                      | -0.06          | -0.82, 0.70 | 0.88    | 0.02            | -0.69, 0.72 | 0.97    |
| $\Delta$ FMI                 |                |             |         |                 |             |         |
| Model 1                      | 0.02           | -0.16, 0.20 | 0.80    | -0.01           | -0.17, 0.14 | 0.88    |
| Model 2                      | 0.05           | -0.16, 0.25 | 0.66    | 0.06            | -0.11, 0.22 | 0.52    |
| $\Delta$ LMI                 |                |             |         |                 |             |         |
| Model 1                      | 0.08           | -0.02, 0.17 | 0.11    | 0.03            | -0.03, 0.09 | 0.34    |
| Model 2                      | 0.01           | -0.09, 0.11 | 0.84    | 0.03            | -0.04, 0.09 | 0.42    |
| $\Delta$ aLMI                |                |             |         |                 |             |         |
| Model 1                      | 0.05           | -0.01, 0.10 | 0.09    | 0.02            | -0.01, 0.05 | 0.13    |
| Model 2                      | 0.02           | -0.04, 0.07 | 0.60    | 0.02            | -0.01, 0.06 | 0.15    |

#: The table displays the association between minutes spent in moderate-to-vigorous physical activity (MVPA) and difference in BMI ( $\text{kg}/\text{m}^2$ ), waist circumference, FMI (fat mass in  $\text{kg}/\text{m}^2$ ), LMI (lean mass in  $\text{kg}/\text{m}^2$ ) and aLMI (appendicular lean mass in  $\text{kg}/\text{m}^2$ ) between Fit Futures 1 (2010-2011) and Fit Futures 2 (2012-2013). The models give the beta coefficient for 15 minutes increase in MVPA. Both models were adjusted for baseline values of the outcome. In model 2 also adjusted for time between measurements and baseline values of pubertal development (pds (boys) and age at menarche (girls)), screen time on weekdays, study specialisation, age in half-years, regularity of eating breakfast and device wear time.

**STROBE** statement for submitted manuscript entitled “*The association between objectively measured physical activity and longitudinal changes in body composition in adolescents; The Tromsø Study Fit Futures Cohort.*”

|                              | <b>Item No</b> | <b>Recommendation</b>                                                                                                                                                                                      |
|------------------------------|----------------|------------------------------------------------------------------------------------------------------------------------------------------------------------------------------------------------------------|
| <b>Title and abstract</b>    | 1              | (a) P. 1, lines 1-2.<br>(b) P. 3, lines 1-23.                                                                                                                                                              |
| <b>Introduction</b>          |                |                                                                                                                                                                                                            |
| Background/rationale         | 2              | P. 5, lines 1-25 and P. 6, lines 1-3.                                                                                                                                                                      |
| Objectives                   | 3              | P. 6, lines 3-8.                                                                                                                                                                                           |
| <b>Methods</b>               |                |                                                                                                                                                                                                            |
| Study design                 | 4              | P. 6, lines 11-16.                                                                                                                                                                                         |
| Setting                      | 5              | P. 6, lines 11-23.                                                                                                                                                                                         |
| Participants                 | 6              | (a) P. 6, lines 18-23.                                                                                                                                                                                     |
| Variables                    | 7              | P. 8, lines 11-24. P. 9, lines 1-25.                                                                                                                                                                       |
| Data sources/<br>measurement | 8*             | P. 6, lines 17-23. P. 7, lines 3-24. P. 8, lines 1-17.                                                                                                                                                     |
| Bias                         | 9              | P. 9, lines 17-25 and P. 10, lines 1-3.                                                                                                                                                                    |
| Study size                   | 10             | P. 6, lines 11-23.                                                                                                                                                                                         |
| Quantitative variables       | 11             | P. 9, lines 12-17.                                                                                                                                                                                         |
| Statistical methods          | 12             | (a) P. 9, lines 1-24 and P. 10, lines 1-6.<br>(b) P. 9, line 1 and P. 10, lines 1-3.<br>(c) P. 6, lines 19-24 and P. 7, lines 1-2.<br>(d) P. 6, lines 23-24 and P. 7, lines 1-2.<br>(e) P. 19, lines 1-12. |
| <b>Results</b>               |                |                                                                                                                                                                                                            |
| Participants                 | 13*            | (a) P. 6, lines 11-23.<br>(b) See (a).                                                                                                                                                                     |
| Descriptive data             | 14*            | (a) See Table 1.<br>(b) See 13a<br>(c) See Table 1.                                                                                                                                                        |
| Outcome data                 | 15*            | See Table 1.                                                                                                                                                                                               |
| Main results                 | 16             | (a) See Tables and P. 9, lines 11-25.<br>(b) See Table 1.                                                                                                                                                  |
| Other analyses               | 17             | P. 10, lines 1-3, and P. 14, lines 9-17. P. 15, lines 1-4. P. 17, lines 22-25. P. 19, lines 1-12.                                                                                                          |
| <b>Discussion</b>            |                |                                                                                                                                                                                                            |
| Key results                  | 18             | P. 15, lines 6-12.                                                                                                                                                                                         |
| Limitations                  | 19             | P. 16, lines 21-25. P. 17, lines 22-25. P. 18 lines 1-11 and lines 16-25. P. 19, lines 1-19.                                                                                                               |
| Interpretation               | 20             | P. 15, lines 13-24. P. 16, 1-25. P. 17, lines 1-25. P. 18, lines 1-11.                                                                                                                                     |
| Generalisability             | 21             | P. 19, lines 1-12 and lines 16-18.                                                                                                                                                                         |
| <b>Other information</b>     |                |                                                                                                                                                                                                            |



1  
2  
3  
4  
5  
6  
7  
8  
9  
10  
11  
12  
13  
14  
15  
16  
17  
18  
19  
20  
21  
22  
23  
24  
25  
26  
27  
28  
29  
30  
31  
32  
33  
34  
35  
36  
37  
38  
39  
40  
41  
42  
43  
44  
45  
46  
47  
48  
49  
50  
51  
52  
53  
54  
55  
56  
57  
58  
59  
60

---

Funding

---

22

P. 21, lines 16.

---

For peer review only
