# Supplementary material for: Association between objectively measured physical activity and longitudinal changes in body composition in adolescents: the Tromsø study fit futures cohort
Source: PubMed Central journal article supplement — BMJ Open. 2020 Oct 7;10(10):e036991. doi: 10.1136/bmjopen-2020-036991 (PMC7542926; doi:10.1136/bmjopen-2020-036991), 2020-10-07
Supplement: bmjopen-2020-036991supp001.pdf [file bmjopen-2020-036991supp001.pdf]

## Supplementary file

| Appendix Table 1. Descriptive characteristics of participants lost to follow-up (n = 133), with p-value for difference from sample in Table 1*. |               |                  |                |                  |
|-------------------------------------------------------------------------------------------------------------------------------------------------|---------------|------------------|----------------|------------------|
|                                                                                                                                                 | Boys (n = 79) | P for difference | Girls (n = 54) | P for difference |
| Age (years)                                                                                                                                     | 16.1 (0.4)    | 0.26             | 16.1 (0.4)     | 0.42             |
| Height (cm)                                                                                                                                     | 176.7 (13.8)  | 0.31             | 164.5 (5.9)    | 0.18             |
| Body weight (kg)                                                                                                                                | 73.3 (18.0)   | 0.01             | 63.5 (1.9)     | 0.06             |
| Body mass index (BMI kg/m <sup>2</sup> )                                                                                                        | 23.4 (5.2)    | 0.01             | 23.4 (4.4)     | 0.02             |
| Waist circumference (cm)                                                                                                                        | 85.1 (13.9)   | <0.01            | 80.0 (12.4)    | 0.02             |
| Total Body Fat Mass (kg)                                                                                                                        | 17.6 (12.8)   | <0.01            | 22.8 (10.3)    | 0.01             |
| Fat Mass Index (FMI kg/m <sup>2</sup> )                                                                                                         | 5.6 (4.0)     | <0.01            | 8.4 (3.5)      | 0.01             |
| Total Body Lean Mass (kg)                                                                                                                       | 53.9 (7.8)    | 0.46             | 38.6 (4.6)     | 0.33             |
| Lean Mass Index (LMI kg/m <sup>2</sup> )                                                                                                        | 17.2 (1.9)    | 0.43             | 14.2 (1.4)     | 0.42             |
| Appendicular Lean Mass (kg)                                                                                                                     | 25.3 (4.1)    | 0.49             | 17.4 (2.5)     | 0.48             |
| Appendicular Lean Mass Index (aLMI kg/m <sup>2</sup> )                                                                                          | 8.1 (1.0)     | 0.41             | 6.4 (0.76)     | 0.29             |
| Accelerometer variables                                                                                                                         |               |                  |                |                  |
| Wear time per valid day                                                                                                                         | 14.3 (1.2)    | 0.26             | 13.7 (1.0)     | <0.01            |
| Counts per minute                                                                                                                               | 338.4 (112.1) | 0.08             | 300.5 (121.5)  | 0.03             |
| Minutes per day in different intensities                                                                                                        |               |                  |                |                  |
| Sedentary (cpm 0 – 99)                                                                                                                          | 570.1 (82.6)  | 0.38             | 562.6 (68.9)   | 0.39             |
| Light (cpm 100 – 1951)                                                                                                                          | 244.3 (64.7)  | 0.05             | 223.4 (46.3)   | 0.04             |
| Moderate (cpm 1952 – 5723)                                                                                                                      | 42.9 (19.6)   | 0.15             | 33.0 (17.6)    | <0.01            |
| Vigorous (cpm ≥ 5724)                                                                                                                           | 2.3 (2.9)     | 0.03             | 2.7 (5.1)      | 0.40             |
| MVPA <sup>#</sup> (cpm ≥ 1952)                                                                                                                  | 45.2 (21.0)   | 0.08             | 35.6 (20.0)    | 0.01             |
| Meeting MVPA guidelines per day                                                                                                                 |               |                  |                |                  |
| 0 – 29 minutes                                                                                                                                  | 21 (26.6)     |                  | 24 (44.4)      |                  |
| 30 – 59 minutes                                                                                                                                 | 41 (51.9)     |                  | 23 (42.6)      |                  |
| ≥ 60 minutes                                                                                                                                    | 17 (21.5)     |                  | 7 (13.0)*      |                  |

\*: Statistically significantly different linear trend from sample included in manuscript (Table 1).

Appendix Table 2. Association between minutes per day spent in sedentary activity (CPM 0 – 99) at baseline and changes in body composition, adjusted for puberty<sup>#</sup>.

|                              | Boys (n = 143) |             |         | Girls (n = 258) |              |         |
|------------------------------|----------------|-------------|---------|-----------------|--------------|---------|
|                              | Beta           | 95% CI      | p value | Beta            | 95% CI       | p value |
| $\Delta$ BMI                 |                |             |         |                 |              |         |
| Model 1                      | -0.02          | -0.14, 0.09 | 0.70    | -0.05           | -0.15, 0.05  | 0.32    |
| Model 2                      | -0.01          | -0.17, 0.14 | 0.85    | -0.11           | -0.24, 0.03  | 0.12    |
| Model 3                      | 0.03           | -0.17, 0.23 | 0.76    | -0.11           | -0.27, 0.05  | 0.19    |
| $\Delta$ waist circumference |                |             |         |                 |              |         |
| Model 1                      | 0.12           | -0.27, 0.51 | 0.55    | -0.01           | -0.42, 0.39  | 0.95    |
| Model 2                      | 0.24           | -0.28, 0.77 | 0.36    | -0.38           | -0.91, 0.15  | 0.16    |
| Model 3                      | 0.37           | -0.32, 1.06 | 0.29    | -0.52           | -1.14, 0.10  | 0.10    |
| $\Delta$ FMI                 |                |             |         |                 |              |         |
| Model 1                      | -0.01          | -0.12, 0.09 | 0.84    | -0.01           | -0.11, 0.08  | 0.81    |
| Model 2                      | -0.01          | -0.15, 0.13 | 0.85    | -0.06           | -0.18, 0.07  | 0.35    |
| Model 3                      | 0.01           | -0.17, 0.20 | 0.90    | -0.05           | -0.20, 0.10  | 0.49    |
| $\Delta$ LMI                 |                |             |         |                 |              |         |
| Model 1                      | 0.00           | -0.05, 0.06 | 0.90    | -0.06           | -0.09, -0.02 | < 0.01  |
| Model 2                      | 0.01           | -0.07, 0.08 | 0.89    | -0.07           | -0.12, -0.02 | < 0.01  |
| Model 3                      | 0.02           | -0.08, 0.11 | 0.74    | -0.08           | -0.13, -0.02 | < 0.01  |
| $\Delta$ aLMI                |                |             |         |                 |              |         |
| Model 1                      | -0.00          | -0.03, 0.03 | 0.91    | -0.02           | -0.04, -0.00 | 0.02    |
| Model 2                      | 0.00           | -0.04, 0.04 | 0.92    | -0.03           | -0.05, -0.00 | 0.02    |
| Model 3                      | 0.01           | -0.04, 0.07 | 0.59    | -0.03           | -0.06, 0.00  | 0.06    |

#: The table displays the association between minutes spent in sedentary activity and difference in BMI ( $\text{kg}/\text{m}^2$ ), waist circumference, FMI (fat mass in  $\text{kg}/\text{m}^2$ ), LMI (lean mass in  $\text{kg}/\text{m}^2$ ) and aLMI (appendicular lean mass in  $\text{kg}/\text{m}^2$ ) between Fit Futures 1 (2010-2011) and Fit Futures 2 (2012-2013). The models give the beta coefficient for 30 minutes increase in sedentary activity. All models were adjusted for baseline values of the outcome. In model 2 also adjusted for time between measurements and baseline values of pubertal development (pds (boys) and age at menarche (girls)), screen time on weekdays, study specialisation, age in half-years, regularity of eating breakfast and device wear time. In Model 3 adjusted also for minutes spent in Moderate-to-vigorous physical activity ( $\text{CPM} \geq 1952$ ).

Appendix Table 3. Association between minutes per day spent in light activity (CPM 100 – 1951) at baseline and changes in body composition, adjusted for puberty<sup>#</sup>.

|                              | Boys (n = 143) |             |         | Girls (n = 258) |             |         |
|------------------------------|----------------|-------------|---------|-----------------|-------------|---------|
|                              | Beta           | 95% CI      | p value | Beta            | 95% CI      | p value |
| <b>Δ BMI</b>                 |                |             |         |                 |             |         |
| Model 1                      | 0.05           | -0.10, 0.20 | 0.53    | 0.04            | -0.09, 0.18 | 0.54    |
| Model 2                      | -0.00          | -0.19, 0.18 | 0.97    | 0.11            | -0.04, 0.27 | 0.15    |
| Model 3                      | -0.03          | -0.23, 0.17 | 0.76    | 0.11            | -0.05, 0.27 | 0.19    |
| <b>Δ waist circumference</b> |                |             |         |                 |             |         |
| Model 1                      | -0.01          | -0.53, 0.51 | 0.97    | 0.53            | -0.00, 1.07 | 0.05    |
| Model 2                      | -0.34          | -0.98, 0.30 | 0.30    | 0.50            | -0.11, 1.11 | 0.11    |
| Model 3                      | -0.37          | -1.06, 0.32 | 0.29    | 0.51            | -0.11, 1.13 | 0.10    |
| <b>Δ FMI</b>                 |                |             |         |                 |             |         |
| Model 1                      | 0.05           | -0.09, 0.18 | 0.51    | 0.02            | -0.11, 0.14 | 0.78    |
| Model 2                      | 0.00           | -0.17, 0.18 | 0.97    | 0.06            | -0.09, 0.20 | 0.43    |
| Model 3                      | -0.01          | -0.20, 0.17 | 0.90    | 0.05            | -0.10, 0.20 | 0.49    |
| <b>Δ LMI</b>                 |                |             |         |                 |             |         |
| Model 1                      | -0.01          | -0.08, 0.06 | 0.84    | 0.04            | -0.01, 0.09 | 0.08    |
| Model 2                      | -0.01          | -0.10, 0.07 | 0.80    | 0.08            | 0.02, 0.13  | < 0.01  |
| Model 3                      | -0.02          | -0.11, 0.07 | 0.74    | 0.08            | 0.02, 0.13  | < 0.01  |
| <b>Δ aLMI</b>                |                |             |         |                 |             |         |
| Model 1                      | 0.00           | -0.04, 0.04 | 0.93    | 0.02            | -0.01, 0.04 | 0.17    |
| Model 2                      | -0.01          | -0.06, 0.04 | 0.73    | 0.03            | 0.00, 0.06  | 0.04    |
| Model 3                      | -0.01          | -0.07, 0.04 | 0.59    | 0.03            | -0.00, 0.06 | 0.06    |

<sup>#</sup>: The table displays the association between minutes spent in light activity and difference in BMI (kg/m<sup>2</sup>), waist circumference, FMI (fat mass in kg/m<sup>2</sup>), LMI (lean mass in kg/m<sup>2</sup>) and aLMI (appendicular lean mass in kg/m<sup>2</sup>) between Fit Futures 1 (2010-2011) and Fit Futures 2 (2012-2013). The models give the beta coefficient for 30 minutes increase in light activity. All models were adjusted for baseline values of the outcome. In model 2 also adjusted for time between measurements and baseline values of pubertal development (pds (boys) and age at menarche (girls)), screen time on weekdays, study specialisation, age in half-years, regularity of eating breakfast and device wear time. In Model 3 adjusted also for minutes spent in Moderate-to-vigorous physical activity (CPM ≥ 1952).

| Appendix Table 4. Association between minutes per day spent in MVPA (CPM $\geq$ 1952) at baseline and changes in body composition, adjusted for puberty <sup>#</sup> . |                |             |         |                 |             |         |
|------------------------------------------------------------------------------------------------------------------------------------------------------------------------|----------------|-------------|---------|-----------------|-------------|---------|
|                                                                                                                                                                        | Boys (n = 143) |             |         | Girls (n = 258) |             |         |
|                                                                                                                                                                        | Beta           | 95% CI      | p value | Beta            | 95% CI      | p value |
| $\Delta$ BMI                                                                                                                                                           |                |             |         |                 |             |         |
| Model 1                                                                                                                                                                | 0.11           | -0.08, 0.31 | 0.24    | -0.00           | -0.17, 0.16 | 0.97    |
| Model 2                                                                                                                                                                | 0.07           | -0.15, 0.29 | 0.51    | 0.07            | -0.11, 0.25 | 0.43    |
| $\Delta$ waist circumference                                                                                                                                           |                |             |         |                 |             |         |
| Model 1                                                                                                                                                                | 0.28           | -0.38, 0.95 | 0.40    | -0.02           | -0.68, 0.64 | 0.95    |
| Model 2                                                                                                                                                                | -0.06          | -0.82, 0.70 | 0.88    | 0.02            | -0.69, 0.72 | 0.97    |
| $\Delta$ FMI                                                                                                                                                           |                |             |         |                 |             |         |
| Model 1                                                                                                                                                                | 0.02           | -0.16, 0.20 | 0.80    | -0.01           | -0.17, 0.14 | 0.88    |
| Model 2                                                                                                                                                                | 0.05           | -0.16, 0.25 | 0.66    | 0.06            | -0.11, 0.22 | 0.52    |
| $\Delta$ LMI                                                                                                                                                           |                |             |         |                 |             |         |
| Model 1                                                                                                                                                                | 0.08           | -0.02, 0.17 | 0.11    | 0.03            | -0.03, 0.09 | 0.34    |
| Model 2                                                                                                                                                                | 0.01           | -0.09, 0.11 | 0.84    | 0.03            | -0.04, 0.09 | 0.42    |
| $\Delta$ aLMI                                                                                                                                                          |                |             |         |                 |             |         |
| Model 1                                                                                                                                                                | 0.05           | -0.01, 0.10 | 0.09    | 0.02            | -0.01, 0.05 | 0.13    |
| Model 2                                                                                                                                                                | 0.02           | -0.04, 0.07 | 0.60    | 0.02            | -0.01, 0.06 | 0.15    |

<sup>#</sup>: The table displays the association between minutes spent in moderate-to-vigorous physical activity (MVPA) and difference in BMI ( $\text{kg}/\text{m}^2$ ), waist circumference, FMI (fat mass in  $\text{kg}/\text{m}^2$ ), LMI (lean mass in  $\text{kg}/\text{m}^2$ ) and aLMI (appendicular lean mass in  $\text{kg}/\text{m}^2$ ) between Fit Futures 1 (2010-2011) and Fit Futures 2 (2012-2013). The models give the beta coefficient for 15 minutes increase in MVPA. Both models were adjusted for baseline values of the outcome. In model 2 also adjusted for time between measurements and baseline values of pubertal development (pds (boys) and age at menarche (girls)), screen time on weekdays, study specialisation, age in half-years, regularity of eating breakfast and device wear time.
